1  
2 **Systematic identification of cancer cell vulnerabilities to natural killer**  
3 **cell-mediated immune surveillance**

4  
5 Matthew F. Pech, Linda E. Fong, Jacqueline E. Villalta, Leanne J.G. Chan, Samir Kharbanda,  
6 Jonathon J. O'Brien, Fiona E. McAllister, Ari J. Firestone, Calvin H. Jan, Jeff Settleman<sup>#</sup>

7  
8 Calico Life Sciences LLC, 1170 Veterans Boulevard, South San Francisco, CA, United States  
9 <sup>#</sup>correspondence: [jsettleman@gmail.com](mailto:jsettleman@gmail.com)

10

11 **Abstract**

12

13 Only a subset of cancer patients respond to T-cell checkpoint inhibitors, highlighting the need for  
14 alternative immunotherapeutics. We performed CRISPR-Cas9 screens in a leukemia cell line to  
15 identify perturbations that enhance natural killer effector functions. Our screens defined critical  
16 components of the tumor-immune synapse and highlighted the importance of cancer cell  
17 interferon- $\gamma$  signaling in modulating NK activity. Surprisingly, disrupting the ubiquitin ligase  
18 substrate adaptor DCAF15 strongly sensitized cancer cells to NK-mediated clearance. DCAF15  
19 disruption induced an inflamed state in leukemic cells, including increased expression of  
20 lymphocyte costimulatory molecules. Proteomic and biochemical analysis revealed that cohesin  
21 complex members were endogenous client substrates of DCAF15. Genetic disruption of DCAF15  
22 was phenocopied by treatment with indisulam, an anticancer drug that functions through DCAF15  
23 engagement. In AML patients, reduced DCAF15 expression was associated with improved  
24 survival. These findings suggest that DCAF15 inhibition may have useful immunomodulatory  
25 properties in the treatment of myeloid neoplasms.

26

## 27 **Introduction**

28

29 Major advances in tumor control have recently been achieved by targeting immune inhibitory  
30 signaling pathways. Treatment with “checkpoint inhibitors,” antibodies targeting PD1, PD-L1, or  
31 CTLA4, lead to durable responses across a wide range of indications, but only in a subset of  
32 patients. Treatment response is positively correlated with tumor mutational burden and infiltration  
33 of CD8<sup>+</sup> effector T cells, which recognize tumor cells via peptides bound to major  
34 histocompatibility complex class I (MHC-I) molecules, suggesting that checkpoint inhibitors work  
35 best at clearing highly immunogenic cancers with repressed T cell responses <sup>1-3</sup>. Substantial efforts  
36 are being made to extend the benefits of immunotherapy to additional patients, including  
37 combining checkpoint inhibitors with other therapies, drugging additional lymphocyte-  
38 suppressive pathways, and boosting the activity of other arms of the immune system <sup>4</sup>.

39

40 Resistance to therapy has long been a major problem in cancer treatment. Drugs targeting tumor  
41 growth pathways can profoundly reduce tumor burden, but resistance invariably arises, driven by  
42 the substantial genetic and phenotypic heterogeneity present within human tumors <sup>5</sup>. Recent  
43 clinical and experimental data have similarly highlighted the ability of cancer cells to escape  
44 checkpoint inhibitor-induced immune control. B2M and JAK1/2 mutations have been identified  
45 in melanoma patients with acquired resistance to checkpoint inhibitors <sup>6,7</sup>. These mutations impair  
46 recognition of the tumor by the adaptive immune system, either by directly disrupting antigen  
47 presentation or by rendering the cells insensitive to IFN $\gamma$ , an important inducer of MHC-I  
48 expression. Functional genetic screens using T cell-cancer cell cocultures have highlighted similar  
49 mechanisms of resistance *in vitro* <sup>8-11</sup>. Even treatment-naïve tumors can be highly immuno-edited,  
50 presenting with IFN $\gamma$  pathway mutations, reduced MHC-I expression and loss of the peptide  
51 sequences that can serve as antigens <sup>12-15</sup>. Together, these findings highlight a critical need for  
52 therapies that can either increase MHC expression or work in a MHC-independent fashion.

53

54 Anti-tumor immunity is not solely mediated by the adaptive immune compartment. Innate immune  
55 cells, most notably natural killer (NK) cells, can have both direct tumoricidal activity and also help  
56 to fully elaborate long-lasting anti-tumor responses <sup>16-19</sup>. NK cells are cytotoxic lymphocytes  
57 capable of mounting rapid responses to damaged, infected, or stressed cells, including cancer cells.

58 T and NK cells share effector functions, releasing cytokines and exocytosing lytic granules upon  
59 activation to kill target cells. However, NK activation status is controlled by the integrated signals  
60 from germline-encoded NK-activating and -inhibiting receptors (aNKRs/iNKRs). Generally,  
61 iNKR ligands are expressed by normal and healthy cells, whereas aNKR ligands are upregulated  
62 after DNA damage or viral insult<sup>19,20</sup>. MHC-I molecules provide a potent inhibitory signal sensed  
63 by NK cells, enabling the innate immune system to respond productively to MHC-deficient cells.  
64 As a result, there is considerable interest in amplifying NK responses to cancers, as well as  
65 developing NK-based cell therapies<sup>18-20</sup>.

66  
67 Here, we performed genetic screens in an MHC-deficient leukemic cell line to systematically  
68 identify modulators of NK-mediated anti-cancer immunity. These screens, unexpectedly, revealed  
69 the potential therapeutic utility of targeting the CRL4 substrate adaptor DCAF15 in myeloid  
70 malignancies. Disruption of DCAF15 strongly sensitized cancer cells to NK-mediated killing,  
71 resulting from increased cancer cell expression of lymphocyte costimulatory molecules. Proteomic  
72 experiments revealed that DCAF15 interacted with and promoted the ubiquitination of the cohesin  
73 complex members. Treatment with indisulam, an anticancer drug that modulates DCAF15  
74 function, reduced interaction with cohesin members and mimicked DCAF15 loss-of-function  
75 immunophenotypes.

76

## 77 **Results**

78

### 79 **A genome-scale CRISPR screen identifies modulators of NK effector functions**

80

81 We performed genome-scale CRISPR screens in K562 cells to identify perturbations that modulate  
82 NK-92-mediated killing (Figure 1A). K562 human chronic myelogenous leukemia cells are a NK-  
83 sensitive cancer cell line that weakly expresses MHC-I. For screening purposes, a clonal isolate of  
84 K562 cells expressing high levels of spCas9 was generated and validated (Figure 1- figure  
85 supplement 1A-C). NK-92 cells are a human lymphoma-derived cell line phenotypically similar  
86 to activated NK cells.<sup>21</sup> These cells exhibit interleukin-2 (IL-2)-dependent growth, express a large  
87 number of aNKRs and few iNKRs<sup>22</sup>, and display potent cytolytic activity against K562 cells.

88

89 In pilot experiments, labeled K562 cells were co-cultured with NK-92 cells to determine an  
90 effector-to-target (E:T) ratio that applied sufficient selective pressure for screening (Figure 1-  
91 figure supplement 1D-F). IL-2 was removed during the co-culture to promote the eventual death  
92 of NK-92 cells, allowing the collection of genomic DNA preparations undiluted by effector cell  
93 DNA. A multi-day timeframe between the NK-92 challenge and screen readout was used to  
94 capture tumor cell fitness changes related both to the direct cytolytic activities of NK cells as well  
95 as the longer-term effects from NK-released cytokines.

96  
97 For the co-culture screen, cas9-expressing K562 cells were infected with a genome-scale single  
98 guide RNA (sgRNA) library targeting all unique coding genes and miRNAs, as well as one  
99 thousand non-targeting controls (Table S2). Seven days post-infection, cells were either grown  
100 normally or challenged with NK-92 cells at a 1:1 or 2.5:1 E:T ratio, reducing K562 cell counts 19-  
101 fold or 43-fold, respectively, by the end of the screen (Figure 1B). Deep sequencing was used to  
102 compare changes in sgRNA abundance between the challenged and unchallenged state after 8 days  
103 of co-culture, and genes were ranked using the MAGeCK software<sup>23</sup>. (Figure 1C, Table S2) There  
104 was good agreement between the results from screens performed at the different E:T ratios (Figure  
105 1- figure supplement 2).

106  
107 The screen revealed two broad classes of “hits”— sgRNAs targeting components of the tumor-  
108 immune synapse or components of the IFN $\gamma$  signaling pathway (Figure 1C-D). Disruption of  
109 ICAM1 was the top-ranked NK-92 evasion mechanism, scoring many orders of magnitude  
110 stronger than any other gene—an observation consistent with the critical role of ICAM1-LFA1  
111 interactions in establishing initial target-lymphocyte adhesion and polarizing cytotoxic granules  
112 towards the synapse<sup>16</sup>. Single guide RNAs targeting multiple other tumor-immune synapse  
113 components were also enriched after NK-92 challenge, including NCR3LG1 (#26-ranked gene by  
114 MaGeCK score), the activating ligand for NKP30 on NK cells<sup>24</sup>; CD58 (#37), an adhesion  
115 molecule that binds CD2<sup>25,26</sup>; and CD84 (#80), a SLAM-related receptor that binds homotypically  
116 to promote activation and cytokine secretion in lymphocytes<sup>27-29</sup>. Other than NECTIN2, sgRNAs  
117 targeting NK-inhibitory surface proteins did not score prominently as NK-sensitization  
118 mechanisms, consistent with the weak MHC-I expression on K562 cells and the limited repertoire  
119 of NK inhibitory receptors expressed on NK-92 cells<sup>22</sup>. NECTIN2 transmits both stimulatory or

120 inhibitory signals to NK cells, depending on whether it is bound to DNAM1 (CD226) or TIGIT,  
121 respectively <sup>30,31</sup>.

122

123 After ICAM1, the top 10 highest scoring NK-92 evasion mechanisms were dominated by sgRNAs  
124 targeting the proximal components of the IFN $\gamma$  signaling pathway, including STAT1, JAK1,  
125 IFNGR2, JAK2 and INFGR1 (Figure 1D). Consistent with the importance of cancer cell IFN $\gamma$   
126 signaling, sgRNAs targeting negative regulators of the interferon response were strongly depleted  
127 after NK-92 challenge. Disruption of the protein tyrosine phosphatases PTPN2 and PTPN1 were  
128 the #2 and #5 ranked NK-92 -sensitizing mechanisms, respectively. Presumably, these proteins  
129 suppress IFN $\gamma$ -induced immunomodulation by dephosphorylating STAT and JAK proteins, as has  
130 been reported in CRISPR screens using T-cell coculture systems or syngeneic tumor models <sup>9,10</sup>.  
131 Taken together, these findings indicate that our *in vitro* functional genomics screens effectively  
132 revealed known components of physiologically-relevant immune synapse and cytokine pathways.

133

#### 134 **Prospective identification of novel genes affecting sensitization to NK cells**

135

136 Mechanisms of NK-92 sensitization identified in the screen were diverse, revealing many strongly-  
137 scoring genes not previously linked to either interferon signaling or NK cell biology (Figure 1).  
138 Most surprisingly, the top-ranked mechanism for promoting NK-92 mediated clearance was  
139 disruption of DCAF15, an uncharacterized substrate adaptor for CRL4 ubiquitin E3 ligases.  
140 DCAF15 is a member of the large family of DDB1 and Cul4-associated factors (DCAFs) <sup>32</sup>. CRL4  
141 complexes enable cells to mark proteins for proteosomal degradation, helping regulate intracellular  
142 protein homeostasis. As substrate adaptors for CRL4, DCAF proteins provide specificity to the  
143 complex, determining which client proteins are ubiquitinated <sup>33</sup>. As with most substrate adaptors,  
144 the normal client repertoire of DCAF15 is undefined, and relatively little is known about the  
145 biological function of DCAF15.

146

147 We also noted that disruption of two cohesin-related genes, STAG2 and HDAC8, scored as NK-  
148 92 sensitization factors (ranked #26 and #19, respectively). Cohesin is a ring-shaped complex  
149 involved in chromatin replication, organization and repair, with STAG2 acting as a core complex  
150 member and HDAC8 controlling chromatin accessibility <sup>34</sup>. Cohesin dysregulation has cell

151 context-specific consequences, including DNA damage and aneuploidy; in leukemic cells, cohesin  
152 mutations are thought to enforce stem cell programs by altering chromatin organization<sup>35</sup>.

153

### 154 **A phenotypic screen based on MHC-I upregulation to identify modulators of the** 155 **IFN $\gamma$ response**

156

157 The prominent role for IFN $\gamma$  signaling in the immune response to cancer cells, both clinically and  
158 in our screens, prompted us to define more specifically which NK-92-sensitizing genes are  
159 involved in modulating the IFN $\gamma$  response. MHC-I levels are highly upregulated in K562 cells  
160 after IFN $\gamma$  exposure, increasing 5.9+/-0.98 fold after 24hrs of exposure to IFN $\gamma$ . This induction  
161 was dependent on STAT1 and was nearly doubled by disrupting PTPN2 (Figure 2A-B and Figure  
162 2- figure supplement 1). We therefore used IFN $\gamma$ -induced cell surface MHC-I expression as a  
163 proxy for the strength of the interferon response. K562 cells transduced with a genome-scale  
164 CRISPR library were treated with IFN $\gamma$  for 24hrs and MHC-I expression was measured by flow  
165 cytometry. The brightest 20% and dimmest 20% of cells were sorted, and deep sequencing was  
166 used to compare sgRNA abundance between the populations (Figure 2C, Table S3).

167

168 As expected, cells with impaired MHC-I upregulation were highly enriched for sgRNAs targeting  
169 the IFN $\gamma$ -JAK-STAT pathway (IFNGR1/2, JAK1/2, STAT1, IRF1/2), as well as the antigen  
170 processing/presentation machinery (B2M, TAP1/2, TAPBP, PDIA3, HLA-C/B) (Figure 2D).  
171 Conversely, disruption of PTPN2 or STAG2 induced an exuberant MHC-I response. Surprisingly,  
172 sgRNAs targeting epigenetic factors were highly enriched within the brightest MHC-I expressing  
173 cells—most prominently, members of the BCOR complex PCGF1 and KDM2B, members of the  
174 PRC2 complex EZH2 and SUZ12, as well as factors affecting histone methylation/acetylation  
175 status.

176

177 Rank-rank comparisons between the NK and MHC screens were informative in prospectively  
178 defining a core group of IFN $\gamma$  response genes in K562 cells (Figure 2E). Comparing sgRNAs  
179 enriched after NK-92 challenge with those causing impaired MHC-I upregulation clearly  
180 delineated the known proximal components of the IFN $\gamma$  signaling pathway (IFNGR1/2, JAK1/2,

181 STAT1), and highlighted several poorly characterized genes such as GSE1, SPPL3 and NR2F2  
182 (Figure 2E).

183

184 Surprisingly, comparing sgRNAs depleted after NK-92 challenge with those causing an  
185 exaggerated MHC-I response highlighted the CRL4 substrate adaptor DCAF15 most prominently,  
186 alongside the cohesin members STAG2 and HDAC8 (Figure 2E). As expected, negative feedback  
187 regulators of the IFN $\gamma$  pathway (PTPN1 and PTPN2) were also recovered by this analysis. We  
188 focused additional studies on understanding the function of DCAF15, given its prominence in both  
189 the NK sensitization (#1 ranked hit at 2.5 E:T ratio; #12 ranked hit at 1:1 E:T ratio) and MHC  
190 upregulation (#13 ranked hit) screens.

191

### 192 **Disruption of DCAF15 enhances NK effector functions**

193

194 To evaluate hits from the CRISPR screens, we generated individual gene knockout (KO) cell lines  
195 by lentiviral sgRNA expression, producing polyclonal cell lines with high levels of gene disruption  
196 (Figure 2- figure supplement 1 and Figure 3-figure supplement 1). Fluorescently-labeled control  
197 or test KO target cell lines were subjected to competitive co-culture assays in the presence of either  
198 NK-92 or primary NK effector cells, with changes in the relative ratios of target cell types  
199 measured over time by flow cytometry (Figure 3A).

200

201 As expected, disrupting ICAM1 in K562 cells conferred very high levels of protection against NK-  
202 92 cells (Figure 3B-C; 19.7-fold enrichment). Disabling signaling downstream of IFN $\gamma$  by  
203 disrupting STAT1 provided an intermediate level of resistance (2.45-fold enrichment). K562s are  
204 very sensitive to NK-mediated killing, providing a large dynamic range for detection of resistance-  
205 promoting factors, while limiting the ability of the assay to detect similarly large increases in  
206 sensitization. Nevertheless, multiple independent sgRNAs targeting DCAF15 promoted  
207 sensitization to NK-92 cells (1.6-fold depletion), with a similar degree of preferential killing  
208 observed for NECTIN2 or PTPN2 KO cells (NECTIN2: 1.95-fold depletion; PTPN2: 1.4-fold  
209 depletion).

210



211 We repeated NK-92 competitive co-culture experiments after disruption of DCAF15, PTPN2,  
212 STAT1 and ICAM1 in Daudi cells, a B2M-deficient B-cell lymphoma line (Figure 3D, Figure 3-  
213 figure supplement 1D-F). ICAM1 KO Daudi cells were highly protected against NK-92 cell  
214 killing, whereas disruption of DCAF15 or PTPN2 led to enhanced killing. In contrast to K562  
215 cells, STAT1 disruption in Daudi cells promoted their preferential killing.

216

217 To extend these observations to primary NK cells, human peripheral NK cells were isolated from  
218 PBMCs of 6 healthy donors, activated and challenged in competitive co-cultures with various  
219 K562 KO cell genotypes (Figure 3E and Figure 3- figure supplement 2). Disruption of DCAF15  
220 or PTPN2 promoted sensitization to primary NK cells, albeit with reduced magnitudes of effect  
221 compared to NK-92 cells (PTPN2: 1.3-fold depletion; DCAF15: 1.15-fold depletion). In 3 out of  
222 6 donors, NK cells showed increased degranulation, as measured by cell surface CD107a  
223 expression, when challenged with DCAF15 KO cells (Figure 3F). ICAM1 disruption promoted  
224 resistance to NK cell attack, but only conferred partial protection (2.3-fold enrichment). The effect  
225 of STAT1 disruption was extremely variable, with STAT1 KO K562 cells strongly preferentially  
226 killed by primary NK cells from a subset of donors. These findings implicate DCAF15 and PTPN2  
227 as novel modulators of NK-mediated cancer cell immunity.

228

### 229 **Loss of the cullin-RING E3 ligase substrate adaptor DCAF15 leads to an inflamed state** 230 **distinct from dysregulated IFN $\gamma$ signaling**

231

232 DCAF15 was a strong hit in both the NK sensitization and MHC upregulation screens, suggesting  
233 that DCAF15 disruption sensitizes K562 cells to NK-mediated killing by dysregulating the IFN $\gamma$   
234 response. Consistent with the screening results, polyclonal K562 cells expressing DCAF15  
235 sgRNAs (“DCAF15 KO cells”) displayed 2.45-fold higher levels of MHC-I than control knockout  
236 cells after 24hrs of IFN $\gamma$  exposure, an effect comparable in magnitude to PTPN2 disruption (Figure  
237 4A). We then tested whether DCAF15 KO cells exhibited hallmarks of dysregulated JAK-STAT  
238 signaling, using PTPN2 KO cells as a positive control. We were unable to see any difference in  
239 induction of STAT1 phosphorylation after IFN $\gamma$  exposure in DCAF15 KO cells, or differences in  
240 steady state levels of STAT1/2, JAK1/2 or IFNGR1 (Figure 4B and data not shown). DCAF15 KO  
241 cells appeared healthy and proliferated at a normal rate (Figure 4 – figure supplement S1A). As in

242 wild-type K562 cells, long-term IFN $\gamma$  exposure was neither cytotoxic nor cytostatic to DCAF15  
243 KO cells (Figure 4c and <sup>36</sup>). In contrast, PTPN2 KO cells showed higher levels of STAT1<sup>PY701</sup>  
244 induction after IFN $\gamma$  exposure, and their proliferative rate was temporarily reduced after transient  
245 exposure to IFN $\gamma$ , or more substantially slowed down by continuous treatment with the cytokine  
246 (Figure 4B-C).

247  
248 We explored the transcriptional and immunophenotypic response of cells to IFN $\gamma$  treatment. RNA-  
249 seq and flow cytometry was performed on control, DCAF15 KO or PTPN2 KO K562 cells basally  
250 and after 24hrs of IFN $\gamma$  exposure. Wild-type cells dramatically upregulated transcription of anti-  
251 viral genes and components of the antigen processing and presentation pathway after IFN $\gamma$   
252 treatment (Figure 4 – figure supplement 1B and Table S4). On the cell surface, K562 cells  
253 exhibited STAT1-dependent upregulation of ICAM1 expression after IFN $\gamma$  treatment, with a  
254 variety of other important NK ligands unaffected by cytokine treatment (Figure 4- figure  
255 supplement 1C).

256  
257 Clustering analysis clearly showed that PTPN2 KO cells were transcriptionally distinct from  
258 control or DCAF15 KO cells both before and after cytokine exposure (Figure 4D). In the basal  
259 state, PTPN2 KO cells were enriched for inflammation and interferon-associated Gene Ontology  
260 (GO) terms (Figure 4 – figure supplement 1D). After cytokine exposure, gene set enrichment  
261 analysis revealed that PTPN2 KO cells had exaggerated transcriptional responses to interferon and  
262 were also enriched for apoptotic GO gene categories (Figure 4 – figure supplement 1E). PTPN2  
263 KO cells also showed greater IFN $\gamma$ -induced MHC-I and ICAM1 cell surface expression (Figure  
264 2A and Figure 4 – figure supplement 1C). These results suggest that loss of appropriate IFN $\gamma$   
265 negative feedback may both promote cell death and modulate NK cell interactions.

266  
267 In contrast, DCAF15 KO cells did not show substantial differences in their transcriptional response  
268 to IFN $\gamma$  (Figure 4D). However, DCAF15 KO cells were enriched for GO terms associated with  
269 NK-mediated cytotoxicity, antigen presentation and cell adhesion, consistent with our phenotypic  
270 characterization of these cells (Figure 4E). Together, these findings indicate that while DCAF15

271 KO K562 cells exhibit a relatively normal response to IFN $\gamma$  stimulation, they are nonetheless in  
272 an inflamed state primed to interact with cytotoxic lymphocytes.

273

### 274 **DCAF15 knockout cells enhance NK-92 triggering via CD80 expression**

275

276 Intriguingly, differential expression analysis showed that one of the most significantly upregulated  
277 genes in DCAF15 KO K562 cells was CD80 (Figure 4F; Q value 3.7e-23, Beta value 0.98). CD80  
278 is an important co-stimulatory molecule for lymphocytes, regulating T cell activation and tolerance  
279 by ligation to CD28, CTLA4 or PDL1<sup>37</sup>. During antigen-presenting cell (APC) activation, the  
280 upregulation of MHC molecules and CD80 provide critical antigenic and costimulatory signals to  
281 T cells<sup>38</sup>. K562 cells are an undifferentiated and multipotential CML cell line, well-studied for  
282 their ability to differentiate towards many different lineages, including APC-like states<sup>39</sup>. We  
283 hypothesized that upregulation of MHC-I and CD80 in DCAF15 KO cells may reflect a broader  
284 acquisition of APC-like properties. Indeed, immunophenotyping of unstimulated DCAF15 KO  
285 cells revealed higher levels of the APC markers CD80, CD40 as well as class I and II MHC  
286 molecules (Figure 5A; 2.23-fold CD80 increase; 2.01-fold CD40 increase; 1.44-fold MHC-I  
287 increase; 1.22-fold MHC-II increase). DCAF15 KO cells did not display higher levels of the APC  
288 maturation marker CD83 (Figure 5A). Expression levels of B7H6, ICAM1, ULBP2/5/6, IFNGR1,  
289 CD58 and NECTIN2 were either unaltered in DCAF15 KO cells or modestly changed in a fashion  
290 not expected to increase sensitivity to NK cells (Figure 5 – figure supplement 1A). Importantly,  
291 the changes to the DCAF15 KO cell immunophenotype could be rescued by constitutive  
292 expression of a sgRNA-resistant DCAF15 open-reading frame (Figure 5 – figure supplement 1B-  
293 D).

294

295 Transducing tumors with the B7 ligands CD80 or CD86 can enhance anti-tumor immunity by  
296 enabling the tumor cells to directly deliver antigenic and costimulatory signals to T and NK cells  
297<sup>40-43</sup>. While best understood in the context of T cell biology, B7 ligands have been shown to  
298 promote NK activation, via CD28-dependent and -independent pathways<sup>42-46</sup>. We confirmed that  
299 NK-92 cells are CD28-positive, whereas we could not detect CD28 on peripheral CD3<sup>-</sup> CD56<sup>+</sup>  
300 NK cells (Figure 5 – figure supplement 1E-F). K562 cells stably over-expressing wild-type CD80  
301 were generated (Figure 5B; 49-fold higher CD80 levels than endogenous). Over-expression was

302 sufficient to increase K562 sensitivity to NK-92 mediated killing (Figure 5C), whereas  
303 overexpression of a mutant form of CD80 carrying point mutations that abrogate CD28 binding<sup>47</sup>  
304 (CD80<sup>Q65A,M72A</sup>) had no effect.

305  
306 We next determined whether the increased CD80 expression in DCAF15 KO cells was important  
307 for their altered NK-92 sensitivity. Changes in NK-92 degranulation were measured after  
308 incubation with K562 cells pretreated with either control or CD80 blocking antibodies (Figure  
309 5D). As expected, ICAM1 KO cells triggered less NK-92 degranulation than control cells (by  
310 52±12%) and were not significantly affected by CD80 antagonism (Figure 5E). DCAF15 KO cells  
311 showed a 17±8% increased ability to trigger NK-92 cells and were approximately twice as  
312 sensitive to CD80 antagonism compared to control cells (Figure 5E-F). Following CD80  
313 antagonism, degranulation triggered by DCAF15 KO was not significantly different from  
314 untreated control cells. Taken together, these results indicate that DCAF15 disruption in K562  
315 cells induces an APC-like immunophenotype conducive to promoting lymphocyte responses, with  
316 higher CD80 expression especially important for increased NK-92 cell triggering.

317

### 318 **The anti-leukemia drug indisulam inhibits DCAF15 function**

319

320 Aryl sulfonamide drugs have demonstrated promising anti-cancer properties in hematological  
321 malignancies<sup>48</sup>. Recently, it was discovered that these agents work by binding DCAF15 and  
322 redirecting the ubiquitination activity of the CRL4-DCAF15 E3 ligase towards the essential  
323 splicing factor RBM39<sup>49,50</sup>. This mechanism of action is conceptually similar to that of the “IMiD”  
324 thalidomide analogs, which promote the degradation of various lymphocyte transcription factors  
325 by engaging the CRL4-cereblon E3 ubiquitin ligase<sup>51-53</sup>. Presumably, sulfonamides and IMiDs  
326 also impair the degradation of the normal client proteins when they induce neomorphic activity of  
327 the substrate adaptor. This has not been proven, however, as it is difficult to systematically  
328 determine the normal substrate repertoire of adaptor proteins.

329

330 We hypothesized that treating cells with low concentrations of the aryl sulfonamide indisulam  
331 would phenocopy DCAF15 depletion (Figure 6A). Three-day dose-response experiments revealed  
332 that K562 cells were sensitive to indisulam, and that DCAF15 disruption reduced this sensitivity,

333 consistent with previous reports<sup>50</sup> (Figure 6B). Dose-response experiments across a panel of 16  
334 hematological cancer cell lines confirmed the reported positive relationship between DCAF15  
335 mRNA expression levels and indisulam sensitivity<sup>49</sup> (Figure 6 – figure supplement 1A;  $R^2=0.33$ ,  
336  $P=0.02$ ).

337  
338 We empirically determined that 100nM indisulam treatment moderately lowered RBM39 levels  
339 while minimally affecting cell viability and proliferation over a four-day period (Figure 6C-D and  
340 <sup>50</sup>). Remarkably, this treatment regime was able to recapitulate the increased CD80 expression  
341 seen in K562 DCAF15 KO cells (Figure 6E; 2.14-fold increase), and more modestly, the effects  
342 on MHC-I and CD40 expression (1.36-fold and 1.27-fold increase, respectively). CD80  
343 upregulation was first detected 24hrs after treatment initiation and plateaued after 48hrs (Figure 6  
344 – figure supplement 1B). Importantly, indisulam treatment did not further upregulate CD80 in  
345 K562 DCAF15 KO cells, suggesting that the pharmaco-modulation of CD80 levels was entirely  
346 mediated through DCAF15 (Figure 6F).

347  
348 To extend these observations to other cell lines, a panel of hematological cancer cell lines was  
349 screened to identify those with detectable CD80 expression (Figure 6 – figure supplement 1C).  
350 The CML cell line KU812 expressed similar levels of CD80 as K562, whereas the Daudi  
351 lymphoma cell line expressed significantly higher basal CD80 levels. These cell lines were  
352 subjected to similar 4-day low-dose regimes of indisulam, which only modestly affected the  
353 growth and viability of the cells (Figure 6 – figure supplement 1D). Both Daudi and KU812 cells  
354 up-regulated CD80 levels after indisulam treatment (Figure 6G; 2.45-fold for Daudi, 1.71-fold for  
355 KU812). Indisulam was not able to induce *de novo* CD80 expression in CD80-negative cell lines  
356 (Figure 6 – figure supplement 1E). Thus, in certain cellular contexts, aryl sulfonamides are  
357 immuno-modulatory agents that alter co-stimulatory protein levels by disrupting the normal  
358 functions of DCAF15.

359  
360 **Reduced DCAF15 expression is associated with improved survival in AML patients**

361  
362 Given the *in vitro* findings, we hypothesized that lower DCAF15 expression in myeloid  
363 malignancies could be associated with better clinical outcomes. We tested this hypothesis using

364 publicly available acute myeloid leukemia (AML) datasets<sup>54,55</sup>. In both adult and pediatric AML,  
365 lower expression of DCAF15 mRNA was associated with increased median overall survival time  
366 (Figure 6H-I). The improved survival of DCAF15-low patients was not driven by a correlation  
367 between DCAF15 expression and more aggressive AML subtypes (Figure 6 – figure supplement  
368 1F-G). Taken together, these findings indicate that lower DCAF15 function, achieved  
369 pharmacologically or by genetic means, is associated with favorable immunophenotypes *in vitro*  
370 and improved outcomes in AML patients.

371

### 372 **Cohesin complex members are CRL4-DCAF15 E3 ligase client proteins**

373

374 The normal substrate repertoire of DCAF15 is unknown. To systemically identify direct DCAF15  
375 client proteins, we undertook proximity-based proteomic analysis of DCAF15 interaction partners  
376 (Figure 7A). DCAF15 was fused to a promiscuous bacterial biotin ligase<sup>56</sup> (“DCAF15-BioID”)  
377 and stably expressed in K562 cells, enabling recovery of interaction partners by streptavidin pull-  
378 down. We first confirmed that exogenous C-terminally tagged DCAF15 was able to rescue  
379 DCAF15 KO phenotypes and associate with CRL4 complex members DDB1 and CUL4A (Figure  
380 5 – figure supplement 1B-D and Figure 7 – figure supplement 1A). During stable DCAF15  
381 overexpression, we observed that the basal concentration of biotin in the media (~3 $\mu$ M) was  
382 sufficient to induce BioID activity in the absence of exogenous (50 $\mu$ M) biotin supplementation  
383 (Figure 7B). However, proteasome inhibition by MG132 increased accumulation of DCAF15-  
384 BioID and biotinylated species. As a control, results were compared to a GFP-BioID fusion,  
385 expected to generically biotinylate proteins. GFP-BioID accumulated much more readily than  
386 DCAF15-BioID, and its biotinylation activity was not affected by MG132 treatment.

387

388 After 24hrs of biotin and MG132 treatment, biotinylated protein species were recovered under  
389 stringent denaturing conditions. Isobaric labeling and mass spectrometry were used to  
390 quantitatively compare the DCAF15 interactome to the GFP interactome (Figure 7C and Table  
391 S5). This approach clearly recovered DCAF15 and the core CRL4 complex, including DDA1,  
392 DDB1 and CUL4A (DCAF15: 155.6-fold change, P=2.5e-152; DDA1: 24.5-fold change, P=6.5e-  
393 139; DDB1: 4.86-fold change, P=8.1e-21; CUL4A: 3.8-fold change, P=8.5e-18).

394



395 Surprisingly, two of the most differentially biotinylated proteins were the cohesin complex  
396 members SMC1A and SMC3 (SMC1: 2.39-fold change,  $P=0.00098$ ; SMC3: 2.76-fold change,  
397  $P=5e-5$ ). We confirmed the interaction between DCAF15-BioID and endogenous SMC1 and 3 by  
398 streptavidin-pulldown followed by western blotting (Figure 7D). To determine whether this  
399 association with cohesin was a generic feature of CRL4 complexes or specific to the CRL4 loaded  
400 with DCAF15, we examined the interaction partners of a different substrate adaptor. DCAF16 is  
401 a nuclear-localized CUL4 substrate adaptor, which, like DCAF15, interacts with DDB1 despite  
402 lacking a canonical WD40 docking domain<sup>32</sup>. When stably expressed in K562 cells, DCAF16-  
403 BioID fusions accumulated similarly to DCAF15-BioID, interacted with DDB1 but did not  
404 biotinylate SMC proteins (Figure 7E). As low concentrations of indisulam phenocopy certain  
405 aspects of DCAF15 depletion (Figure 6), we asked whether indisulam treatment would alter the  
406 interaction of DCAF15 with cohesin. DCAF15-BioID cells were pre-treated with indisulam for  
407 72hrs prior to biotin and MG132 addition. This treatment regime lead to substantial indisulam-  
408 dependent biotinylation of RBM39 and reduced recovery of biotinylated SMC proteins (Figure  
409 7E).

410  
411 To test whether DCAF15 promoted SMC1 ubiquitination, we co-transfected 293T cells with his-  
412 tagged ubiquitin, DCAF15 and SMC1A, and purified ubiquitinated species under denaturing  
413 conditions by nickel affinity chromatography. Co-expression of DCAF15, but not GFP, led to the  
414 recovery of poly-ubiquitinated SMC1A (Figure 7F). Treatment with indisulam reduced the amount  
415 of ubiquitinated SMC1A recovered. These orthogonal proteomic and biochemical assays support  
416 the notion that cohesin proteins are *bona fide* client ubiquitination substrates for DCAF15, with  
417 these interactions impaired by DCAF15-engaging aryl sulfonamide drugs.

418

## 419 **Discussion**

420

421 Clinical and experimental data have revealed that disrupting optimal antigen presentation levels is  
422 a common mechanism by which cancer cells escape recognition by the adaptive immune system.  
423 We performed CRISPR-Cas9 screens using NK-92:K562 co-cultures to uncover perturbations that  
424 enhance natural killer mediated anti-cancer immunity. We discovered and characterized how  
425 disruption of DCAF15 or PTPN2 sensitizes a variety of cancer cell types to both NK-92 and

426 primary NK cells. In addition, the screens clearly identified known lymphocyte adhesion factors  
427 and aNKR/iNKR ligands, such as ICAM1, NCR3LG1, CD58, CD84 and NECTIN2. Performing  
428 additional genetic screens on diverse cancer cell lines and natural killer subtypes will enable a  
429 more complete understanding of the relative importance of various aNKRs and iNKRs and should  
430 identify novel immunotherapeutic targets.

431  
432 There was a strong IFN $\gamma$  signature within our NK-92:K562 screens. We determined that disruption  
433 of PTPN2, a negative regulator of IFN $\gamma$  signaling, consistently enhanced NK cell sensitivity.  
434 Interestingly, preventing cancer cell IFN $\gamma$  signaling had a much more variable effect than removing  
435 negative feedback on the pathway, promoting resistance or sensitization to NK cells in target and  
436 effector cell dependent manner. This variability likely reflects the complexity of cancer cell IFN $\gamma$   
437 signaling, which can include MHC upregulation, growth suppression and immunomodulation.

438  
439 In K562 cells, PTPN2 KO rendered IFN $\gamma$  treatment growth suppressive, likely through the  
440 induction of apoptosis, while also enhancing the immunomodulatory effects of the cytokine. The  
441 immunophenotypic changes include enhanced MHC-I expression, which likely inhibits full  
442 activation of NK cell cytotoxicity, especially in primary NK cells that express a broader KIR  
443 repertoire than NK-92 cells<sup>22</sup>. PTPN2 disruption has previously been shown to enhance activated  
444 T-cell mediated killing, as well as potentiate the effect of immunotherapy in syngeneic tumor  
445 models<sup>9,10,57</sup>. These data suggest that targeting PTPN2 may be a generalizable strategy to sensitize  
446 tumor cells to multiple arms of the immune system.

447  
448 The importance of the cancer cell IFN $\gamma$  response prompted us to systemically identify  
449 perturbations that modulated IFN $\gamma$  signaling, as read out by cytokine-induced MHC-I  
450 upregulation. As expected, this screen clearly delineated the proximal components of the IFN $\gamma$ -  
451 JAK-STAT pathway, as well as the antigen processing/presentation machinery. Surprisingly,  
452 disruption of DCAF15, a poorly characterized substrate adaptor for the CRL4 E3 ligase, was a top  
453 scoring hit in both the MHC-I and NK screens. We therefore focused our efforts on understanding  
454 the role of DCAF15 in this context. We determined that DCAF15 KO cells did not have a grossly  
455 dysregulated response to IFN $\gamma$ , but scored in the MHC-I screen due to higher unstimulated levels  
456 of MHC-I. This change reflected a broader phenotypic switch in DCAF15 KO cells reminiscent



457 of APC activation, including the upregulation of a variety of co-stimulatory and antigen-presenting  
458 molecules (Figure 7G). Higher CD80 levels in DCAF15 KO cells were especially important for  
459 increasing NK-92 cell triggering. Cross-talk between APCs and NK cells is a well-established  
460 phenomenon that mutually regulates both cell types<sup>58</sup>. These interactions, which often occur at  
461 sites of inflammation or secondary lymphoid organs, can promote APC maturation or lysis in a  
462 context-dependent fashion. Further work is needed to determine whether DCAF15 plays a role in  
463 the activation of APCs and their interactions with NK cells.

464

465 Our data suggest that the surface factors upregulated by DCAF15 disruption are not direct client  
466 proteins of the substrate receptor, but rather represent events secondary to altered turnover of the  
467 normal DCAF15 client protein(s). We pioneered a novel approach to systemically purify substrates  
468 of DCAF family members, as conventional biochemical methods are poorly suited to recover the  
469 transient, low-affinity interactions between substrate adaptors and client proteins. The use of  
470 DCAF-BioID fusion proteins and proteasome inhibition protects labile substrates from  
471 degradation and robustly recovers biotinylated proteins under stringent, denaturing conditions. We  
472 anticipate this will be a generalizable strategy for discovering client proteins for the whole family  
473 of CUL4 CRL substrate receptors.

474

475 Proteomic analysis and subsequent validation experiments showed that DCAF15 loaded into  
476 CLR4 complexes, interacted with cohesin complex members SMC1 and SMC3, and promoted  
477 their ubiquitination. We were intrigued by these interactions given the similar CRISPR screening  
478 scoring pattern of DCAF15 to the cohesin factors STAG2 and HDAC8 (Figure 2E); the shared  
479 roles of cohesin and CRL4 E3 ligases in DNA metabolism, organization, replication and repair  
480<sup>34,59,60</sup>; and the ability of cohesin mutations to dysregulate hematopoietic differentiation in myeloid  
481 malignancies<sup>35</sup>. Rather than globally controlling SMC protein levels, we speculate that CRL4-  
482 DCAF15 complexes ubiquitinate cohesin at specific genomic sites to regulate chromatin topology  
483 or repair (Figure 7G). In this model, disruption of either STAG2, HDAC8 or DCAF15 impair  
484 cohesin function with overlapping phenotypic consequences. Further work is needed to elaborate  
485 the control of cohesin function by DCAF15 and how this may promote APC-like differentiation.

486

487 Recently, it was discovered that aryl sulfonamide drugs including indisulam are capable of binding  
488 to DCAF15 and altering CRL-DCAF15 substrate specificity towards the splicing factor RBM39  
489 <sup>49,50</sup>. The cytotoxic effects of indisulam were driven by splicing defects resulting from RBM39  
490 degradation. Our studies confirmed indisulam-induced RBM39 degradation and the indisulam-  
491 dependent interaction between DCAF15 and RBM39. We also discovered indisulam-induced  
492 phenotypes attributable to inhibition of DCAF15's normal functions. Concentrations of indisulam  
493 with limited RBM39 degradation or cytotoxicity had immunomodulatory properties that  
494 phenocopied genetic DCAF15 disruption. Biochemically, the recruitment of endogenous client  
495 proteins to CRL4-DCAF15 and subsequent ubiquitination was impaired by indisulam treatment.  
496 We also determined that AML patients with naturally occurring lower levels of DCAF15 had  
497 improved overall survival. While these clinical data are preliminary in nature, they provide a  
498 rationale for drugging DCAF15 in myeloid neoplasms, achieved through judicious dosing of  
499 existing anti-cancer sulfonamides or the development of pure DCAF15 inhibitors.

500

501

502 **FIGURES**

503 **Figure 1. A genome-scale CRISPR screen identifies modulators of NK effector functions**

- 504 A) Overview of the genome-scale NK CRISPR screening system.
- 505 B) K562 population doublings (PDs) during the CRISPR screen, as measured by total number  
506 of live cells. Note that early timepoints from the co-culture reflect the presence of both  
507 K562 and NK-92 cells.
- 508 C) Analysis of the NK CRISPR screen results. Changes in sgRNA abundance were compared  
509 between the 2.5:1 E:T co-culture condition and day 15 dropout cells using the MAGeCK  
510 algorithm. The top 10 enriched or depleted genes are shown, as rank-ordered by MAGeCK  
511 score; other manually selected genes are highlighted with their rank indicated. FDR, false  
512 discovery rate.
- 513 D) Overview of high-scoring components of the tumor-immune synapse and IFN $\gamma$  signaling  
514 pathway recovered by the screen. sgRNAs against genes enriched after exposure to NK-92  
515 cells are marked in red, while depleted sgRNAs are marked in blue.

516

517 **Figure 1 – figure supplement 1. Optimization of NK CRISPR screens.**

- 518 A) Western blot showing spCas9 expression in clonal isolates of K562 cells infected with a  
519 Cas9-expressing lentivirus. Asterisk highlights the clone used for screening purposes.
- 520 B) Measurement of Cas9 activity using an EGFP disruption assay. Cas9-expressing K562  
521 cells were infected at a low MOI with a lentivirus expressing EGFP and a sgRNA targeting  
522 EGFP. The percent of cells that lost EGFP expression was measured over time by flow  
523 cytometry.
- 524 C) Measurement of Cas9 activity using sgRNAs targeting mismatch-repair (MMR) complex  
525 members. A Cas9-expressing K562 clonal isolate was infected at a low MOI with a  
526 lentivirus expressing sgRNAs against core members of the MMR complex. Protein  
527 disruption was measured by western blot 10 days after sgRNA infection. Note that certain  
528 MMR complex members depend on other binding partners for stability.
- 529 D) Experimental design for determining selective pressure of different E:T cell ratios. K562  
530 cells were labeled with carboxyfluorescein succinimidyl ester (CFSE) prior to co-culture  
531 with NK-92 cells.

- 532 E) Effect of increasing E:T cell ratio on total number of viable target cells over time. During  
533 early timepoints, CFSE fluorescence was used to generate target cell counts. At later  
534 timepoints, total cell counts accurately reflected target cell counts due to NK-92 cell death.  
535 F) Representative image of NK-92:K562 co-cultures at 5:1 E:T ratio. NK-92 cells (unlabeled)  
536 form aggregate structures enveloping the target cells (green). Scale bar, 250 $\mu$ M.

537

538 **Figure 1 – figure supplement 2. Additional NK CRISPR screen data.**

- 539 A) Analysis of the NK CRISPR screen results performed at a lower E:T ratio. sgRNA  
540 abundance was compared between the 1:1 E:T ratio co-culture condition and day 15  
541 dropout cells using the MAGeCK algorithm. The computed false discovery rate (FDR) is  
542 plotted against the  $-\log_{10}$  transformation of the MAGeCK score. The top 5 enriched or  
543 depleted genes are shown, as rank-ordered by MAGeCK score; other manually selected  
544 genes are highlighted with their rank indicated in parentheses.

545

- 546 **Supplemental Table 1.** Design of genome-scale CRISPR library. sgRNA sequences and  
547 coordinates of the intended target locus are provided.

548

- 549 **Supplemental Table 2.** NK CRISPR screen data. Normalized sgRNA counts and MAGeCK  
550 analysis output are provided.

551

552 **Figure 2. A phenotypic screen based on MHC-I upregulation to identify modulators of the**  
553 **IFN $\gamma$  response**

- 554 A) Flow cytometry measurement of MHC-I expression in K562 cells transduced with the  
555 indicated sgRNAs after 24hrs of 10ng/ml IFN $\gamma$  treatment.

- 556 B) Fold upregulation of MHC-I expression after IFN $\gamma$  treatment in K562 cells transduced with  
557 the indicated sgRNAs. Mean and standard deviation are shown. \*\*\* P value= 0.0002, \*\*  
558 P value=0.03, Mann-Whitney test.

- 559 C) Design of CRISPR screen for IFN $\gamma$ -induced upregulation of MHC-I expression. SSC, side-  
560 scatter.

- 561 D) Analysis of the MHC-I upregulation CRISPR screen results. The MAGeCK algorithm was  
562 used to compare sgRNA abundance between cells in the bottom two and top two deciles

563 of MHC-I expression. The false discovery rate (FDR) is plotted against the  $-\log_{10}$   
564 transformation of the MAGeCK score. The top 5 to 10 enriched or depleted genes are  
565 shown, as rank-ordered by MAGeCK score; other manually selected genes are highlighted  
566 with their rank indicated in parentheses.

567 E-F) Comparison of the NK and MHC screening results. Results of each screen were rank-  
568 ordered based on their MAGeCK score. Select genes are highlighted.

569

570 **Figure 2 – figure supplement 1. Confirmation of gene disruption in K562 cells.**

571 A) Western blot of total STAT1 levels in K562 cells infected with control or STAT1 sgRNAs.

572 B) Western blot of PTPN2 levels in K562 cells infected with control or PTPN2 sgRNAs.

573

574 **Supplemental Table 3.** Raw MHC-I screen data. Normalized protospacer counts and MAGeCK  
575 analysis output are included.

576

577 **Figure 3. Disruption of DCAF15 enhances NK effector functions**

578 A) Experimental design of competitive co-culture experiments, with FACS data illustrating a  
579 hypothetical sgRNA that enhances NK-mediated target cell clearance.

580 B) Representative results from NK-92:K562 competitive co-culture experiments performed at  
581 a 2.5:1 E:T ratio.

582 C) Results of competitive co-culture performed at a 2.5:1 E:T ratio and measured 48-96hrs  
583 after challenge of K562 cells with NK-92 cells. Mean and standard deviation are shown.  
584 \*\*\* P-value <0.0001, Mann-Whitney test.

585 D) Results of competitive co-culture performed at a 1:1 E:T ratio and measured 48-96hrs after  
586 challenge of K562 cells with IL-2 activated isolated peripheral NK cells. \*\* P-value <0.01,  
587 \* P-value =0.06, Wilcoxon matched-pairs signed rank test.

588 E) Results of competitive co-culture performed at a 2.5:1 E:T ratio and measured 48-96hrs  
589 after challenge of Daudi cells with NK-92 cells. Mean and standard deviation are shown.  
590 \*\*\* P-value <0.0001, \*\* P-value=0.0022, \* P-value=0.09, Mann-Whitney test.

591 F) Flow cytometry analysis of NK cell degranulation (cell surface CD107A expression) after  
592 2hr coculture of primary NK cells with indicated target cell types at 2.5:1 E:T ratio. Line

593 indicates median value. \*\* P-value =0.095, \* P-value=0.067, NS P-value>0.10, Mann-  
594 Whitney test.

595

596 **Figure 3 – figure supplement 1. Confirmation of gene disruption in K562 and Daudi cells.**

597 A) Measurement of cell surface NECTIN2 expression by flow cytometry in K562 cells  
598 expressing control or NECTIN2 sgRNAs. Gates show background levels of fluorescence.

599 B) Measurement of cell surface ICAM1 expression by flow cytometry in K562 cells  
600 expressing control or ICAM1 sgRNAs. Gates show background levels of fluorescence.

601 C) Measurement of DCAF15 mRNA expression by RNAseq in K562 cells transduced with  
602 control or DCAF15 sgRNAs.

603 D) Western blot of PTPN2 levels in Daudi cells infected with control or PTPN2 sgRNAs.

604 E) Measurement of cell surface ICAM1 expression by flow cytometry in Daudi cells  
605 expressing control or ICAM1 sgRNAs. Gates show background levels of fluorescence.

606 F) Measurement of DCAF15 mRNA expression by RNAseq in Daudi cells transduced with  
607 control or DCAF15 sgRNAs.

608

609 **Figure 3 – figure supplement 2. Co-culture of primary NK cells with K562 cells.**

610 A) Flow cytometry analysis of purity of isolated peripheral NK cells 24hrs after IL-2  
611 stimulation.

612 B) Flow cytometry analysis of activation status of CD3-CD56+ NK cells after 24hrs of IL-2  
613 stimulation.

614

615 **Figure 4. DCAF15 disruption leads to an inflamed state distinct from dysregulated IFN $\gamma$ -  
616 JAK-STAT signaling**

617 A) Flow cytometry measurement of cell surface MHC-I expression in K562 cells transduced  
618 with the indicated sgRNAs after 24hrs of 10ng/ml IFN $\gamma$  treatment. \*\*\* P <0.0001; \*\* P=  
619 0.0044, Mann-Whitney test.

620 B) Western blots illustrating total and phosphorylated STAT1 after 30 minutes of 1ng/ml IFN $\gamma$   
621 treatment in K562 cells infected with the indicated sgRNAs.

- 622 C) Growth rate of K562 cells expressing the indicated sgRNAs, cultured under basal  
623 conditions (“untreated”), treated 24hrs with 10ng/ml IFN $\gamma$  (“IFN $\gamma$  pulse”), or continuously  
624 retreated with 10ng/ml IFN $\gamma$  every day (“IFN $\gamma$  constant”).
- 625 D) Principle component analysis (for principle components (PC) 1 and 3) of transcriptomes  
626 from K562 cells expressing the indicated sgRNAs and treated +/- 10ng/ml IFN $\gamma$  for 24hrs.
- 627 E) Selected GO terms, identified by RNA-seq, enriched in DCAF15 KO cells. Negative log10  
628 transformation of the Benjamini-Hochberg corrected P value.
- 629 F) Volcano plot of genes differentially expressed between DCAF15 KO cells compared to  
630 control KO cells. Selected genes are highlighted. The FDR-corrected P-value generated  
631 from a likelihood ratio test (Q-value) is plotted against an approximate measure of the fold  
632 change in expression (Beta value).

633

634 **Figure 4 – figure supplement 1**

- 635 A) Growth rate of K562 cells expressing sgRNAs against DCAF15 or a control gene. Results  
636 from 2-3 independent experiments and 2-3 different sgRNAs per gene. Mean and standard  
637 deviation are shown. DCAF15 sgRNAs, 1.1+/-0.01 population doublings per day. Control  
638 sgRNAs, 1.13+/-0.03 population doublings per day.
- 639 B) Volcano plot of genes differentially expressed in control K562 cells after 24hrs of IFN $\gamma$   
640 treatment. Selected genes are highlighted. Genes that were off-scale and could not be  
641 plotted are shown in the oval. The FDR-corrected P-value generated from a likelihood ratio  
642 test (Q-value) is plotted against an approximate measure of the fold change in expression  
643 (Beta value).
- 644 C) Flow cytometry analysis of the change in cell surface expression of the indicated cell  
645 surface markers in K562 cells transduced with the indicated sgRNAs after 24hrs of 10ng/ml  
646 IFN $\gamma$  treatment. \*\* P value= 0.003, \* P value=0.026, Mann-Whitney test.
- 647 D) Gene set enrichment analysis (GSEA) of genes differentially upregulated in PTPN2 KO  
648 cells. nES, normalized enrichment score. Categories with a FDR Q-value of <0.1 are  
649 shaded in blue.
- 650 E) GSEA of genes differentially upregulated in PTPN2 KO cells after IFN $\gamma$  treatment.
- 651



652 **Supplemental Table 4.** List of differentially expressed genes determined by RNA-seq of control,  
653 DCAF15 or PTPN2 KO K562 cells.

654

655 **Figure 5. DCAF15 knockout cells enhance NK-92 triggering via CD80 expression**

656 A) Flow cytometry measurements of the indicated cell surface markers in K562 cells  
657 expressing the indicated sgRNAs. N=9-24 samples per condition. \*\*\* P<0.0001, \*\*  
658 P=0.001, ns P>0.1, Mann-Whitney Test.

659 B) Flow cytometry measurement of CD80 surface expression in control K562 cells or those  
660 transduced with lentivirus to overexpress CD80. Gate shows level of background  
661 fluorescence in unstained cells.

662 C) Results of competitive co-culture between indicated K562 cell types and NK-92 cells,  
663 performed at 1:1 E:T ratio. K562 cells were unmanipulated (“control”) or overexpressed  
664 wild-type CD80 (CD80<sup>wt</sup>) or mutant CD80 (CD80<sup>mut</sup>; contains Q65A and M72A point  
665 mutations that abrogate CD28 binding). \* P=0.005, \*\* P=0.0007, NS P>0.1, unpaired T  
666 test.

667 D) Experimental design of CD80 blockade experiment.

668 E) Effect of blocking antibodies to CD80 on NK-92 activation, measured by CD107 flow  
669 cytometry on NK-92 cells after 4hrs of co-culture. Data points from experiments performed  
670 on the same day are joined by lines of the same color. \*\* P=0.03, \* P=0.06, ns P>0.1,  
671 Wilcoxon matched-pairs signed rank test. Experiment performed 4 times, 2x sgRNAs per  
672 condition.

673 F) Percent decrease in NK-92 degranulation after CD80 antibody treatment of indicated target  
674 cells. Data points from experiments performed same day are joined by lines. Mean is  
675 indicated. \*\* P=0.03, Wilcoxon matched-pairs signed rank test.

676

677 **Figure 5 – figure supplement 1**

678 A) Flow cytometry measurements of the indicated cell surface markers in K562 cells  
679 expressing the indicated sgRNAs. N=2-14 samples per condition. Ns P>0.1, \* P=0.04, \*\*  
680 P=0.01, Mann-Whitney Test.

681 B) Experimental design for rescuing DCAF15 disruption in K562 by lentiviral expression of  
682 a sgRNA-resistant DCAF15 open reading frame.



- 683 C) Western blot of DCAF15 rescue construct expression.
- 684 D) Flow cytometry measurements of the indicated cell surface markers in K562 cells  
685 expressing the indicated sgRNAs and rescue constructs. N=6-24 samples per condition.  
686 \*\*\* P<0.0001, \*\* P=0.004, Mann-Whitney test.
- 687 E) Flow cytometry measurement of CTLA4 and CD28 expression on NK-92 cells. Gates show  
688 background fluorescence levels in unstained cells.
- 689 F) Flow cytometry measurement of CD28 expression in peripheral unstimulated NK cells.

690

691 **Figure 6. The anti-leukemia drug indisulam inhibits DCAF15 function**

- 692 A) Proposed model for DCAF15 gain- and loss-of-function phenotypes triggered by indisulam  
693 treatment.
- 694 B) Dose response of K562 cells expressing the indicated sgRNAs to indisulam. Relative  
695 viability measured by ATP content. N=2 experiments. Mean and standard deviation are  
696 shown.
- 697 C) Growth of K562 cells treated with 0.1 $\mu$ M indisulam over 4 days. N=12 per timepoint.  
698 Mean and standard deviation are shown.
- 699 D) Western blot for total RBM39 levels in K562 cells after 0.1 $\mu$ M indisulam treatment for the  
700 indicated number of days.
- 701 E) Flow cytometry measurements of the indicated cell surface markers in K562 cells after  
702 indisulam treatment. Mean and standard deviation are shown. \*\*\* P<0.0001, \*\* P=0.0085,  
703 \* P=0.013, mean significantly different from 1, one sample T test.
- 704 F) CD80 expression measured by flow cytometry in indisulam-treated K562 cells expressing  
705 the indicated sgRNAs. Mean and standard deviation are shown. N=4-6 samples. \*\*  
706 P=0.0095, \* P=0.0286, ns P>0.1, Mann-Whitney test.
- 707 G) Effect of indisulam treatment on CD80 expression in the indicated cell lines. N=3-12  
708 samples. Mean and standard deviation are shown. \*\*\* P<0.0001, \*\* P= 0.0066, mean  
709 significantly different from 1, one sample T test.
- 710 H) Kaplan-Meier analysis of overall survival in adult AML patients from TCGA LAML  
711 project stratified by DCAF15 expression. “DCAF15 high” and “DCAF15 low” represents  
712 patients in top or bottom 50% of DCAF15 expression, respectively. N=142 patients. 95%

713 confidence interval shown. Median survival, 16.17 vs 12.18 months. P-value from log-rank  
714 test.

715 l) Kaplan-Meier analysis of overall survival in pediatric AML patients from TARGET project  
716 stratified by DCAF15 expression. “DCAF15 high” and “DCAF15 low” represents patients  
717 in top or bottom 20% of DCAF15 expression, respectively. N=76 patients. 95% confidence  
718 interval shown. Median survival, 21.17 vs NA. P-value from log-rank test.

719

## 720 **Figure 6 – figure supplement 1**

721 A) Relationship between DCAF15 mRNA expression and indisulam sensitivity across a panel  
722 of cell lines.

723 B) Time-course of CD80 expression after indisulam treatment in K562 cells measured by flow  
724 cytometry. Blue shading indicates period of CD80 upregulation. N=2-4 samples per  
725 timepoint. Mean and standard deviation are shown.

726 C) CD80 expression measured by flow cytometry across a panel of cancer cell lines. Dashed  
727 line indicates background level of antibody staining, with cell lines in red have expressing  
728 above background levels of the protein. CML, chronic myelogenous leukemia. BL,  
729 Burkitt’s lymphoma. AML, acute myeloid leukemia. AMoL, acute monocytic leukemia.  
730 T-ALL, T-acute lymphoblastic leukemia. MM, multiple myeloma. ALCL, anaplastic large  
731 cell lymphoma.

732 D) Growth of Daudi and KU812 cells treated with 0.1 $\mu$ M indisulam over 4 days. N=3 per  
733 timepoint. Mean and standard deviation are shown.

734 E) Fold change in CD80 expression in the indicated cell lines after 4 days treatment with  
735 0.1 $\mu$ M indisulam.

736 F) Box and whisker plot of DCAF15 expression in TCGA LAML samples, stratified by  
737 subtype using the French American British (FAB) AML classification scheme. Analysis  
738 from UALCAN portal <sup>61</sup>. Subtypes with significantly different median expression values  
739 are indicated.

740 G) FAB classification of adult AML patients in the TCGA LAML project, stratified by top  
741 50% (“DCAF15 high”) or bottom 50% (“DCAF15 low”) of DCAF15 expression.

742

## 743 **Figure 7. Cohesin complex members are CRL4-DCAF15 E3 ligase client proteins**

- 744
- 745 A) Experimental system for discovering DCAF15 interaction partners by proximity ligation.
- 746 B) Indicated constructs were stably expressed in K562 cells, and biotinylated proteins detected
- 747 by HRP-conjugated streptavidin (“ $\alpha$ -biotin”). Asterisks denote major endogenous biotin-
- 748 containing proteins. “MG132” and “Biotin” refer to 18hrs treatment with 5 $\mu$ M MG132 or
- 749 50 $\mu$ M biotin.
- 750 C) Proteins identified by quantitative mass spectrometry as differentially biotinylated by
- 751 DCAF15-BioID as compared to GFP-BioID. Log<sub>2</sub>-fold changes are plotted against
- 752 precision of the measurement (1/ coefficient of variation). Colors denote the posterior
- 753 probability that a protein fold change was small (referred to as “P-null” in the legend), as
- 754 explained in the methods. Data points in red are select CRL4 core complex members. Data
- 755 points in blue are endogenous biotin-containing proteins.
- 756 D-E) Affinity capture of biotinylated proteins by streptavidin beads (“biotin IP”) and detection
- 757 by western blot. Indicated constructs were stably expressed in K562 cells. “Indisulam”
- 758 refers to 48hrs 0.1 $\mu$ M indisulam treatment prior to MG132 and biotin addition.
- 759 F) Capture of 6xhis-ubiquitinated species by nickel chromatography under denaturing
- 760 conditions and detection by western blot. The indicated expression plasmids were
- 761 transiently transfected into 293T cells. Input samples were prepared from whole cell lysates
- 762 (WCL). “MG132” and “Indisulam” refer to 12hrs treatment with 10 $\mu$ M MG132 or 2 $\mu$ M
- 763 Indisulam prior to harvest.
- 764 G) Model of DCAF15 function.

765

### 766 **Figure 7 – figure supplement 1**

- 767 A) Exogenous DCAF15 interacts with CRL4 core complex members. Indicated constructs
- 768 were stably expressed in K562 cells. Anti-Flag immunoprecipitations were performed and
- 769 analyzed by western blot.

770

771 **Supplemental Table 5.** Comparison of biotinylated proteins recovered from K562 cells

772 expressing DCAF15-BioID or GFP-BioID using isobaric labeling and mass spectrometry.

773

774 **Supplemental Table 6.** List of sgRNA sequences used.

775

776 **Supplemental Table 7.** List of antibodies used.

777

778 **Supplemental Table 8.** Primer design for sequencing sgRNA libraries.

779

780

## 781 **Materials and methods**

782

### 783 ***Cell lines***

784 All cell lines were purchased from ATCC and were tested monthly for mycoplasma contamination.  
785 Cell lines other than NK-92 were maintained in RPMI supplemented with 10% FBS, 1mM  
786 GlutaMAX and 1% antibiotic, antimycotic. NK-92 cells were grown in Myelocult H5100 (Stem  
787 cell Technologies) supplemented with 100U/ml human IL-2 (Peprotech cat#200-02). IL-2 stock  
788 solution was made by reconstituting lyophilized cytokine to 10e6 U/ml in 50mM acetic acid, 0.1%  
789 BSA in PBS.

790

### 791 ***Construction of the CRISPR Library***

792 CRISPR screening was performed using bespoke genome-scale libraries, to be described in detail  
793 elsewhere. In brief, the sgRNA library was designed with 120,021 sgRNAs present, representing  
794 6 guides each against 21,598 genes and 4 guides each against 1,918 miRNAs, as well as 1000 non-  
795 targeting negative control guides (Table S1). sgRNAs targeting protein-coding genes were based  
796 on the Avana libraries<sup>62</sup>. sgRNAs targeting miRNAs were based on the design of the Gecko v2.0  
797 libraries<sup>63</sup>. The protospacer library was synthesized by Twist Biosciences. The synthesized oligo  
798 library was amplified using emulsion PCR followed by purification. The vaccinia virus DNA  
799 polymerase was used to clone the protospacers into a lentiviral construct (In-fusion, Takara). The  
800 lentiviral construct was linearized by Bfu1 digestion (New England Biolabs). To ensure complete  
801 digestion, Bfu1 activity was stimulated by addition of 500nM of a double-stranded oligo  
802 containing a Bfu1 site (5' atagcacctgctata 3') (based on<sup>64</sup>).

803

804 The guide RNAs were expressed from a human U6 promoter, using a modified sgRNA design (A-  
805 U flip, longer stem-loop) previously described<sup>65</sup>. An EF1a-Puro-T2A-cerulean-wpre ORF was  
806 used for selection purposes and for measuring infection rates. The library was electroporated into  
807 MegaX cells and plated across 37x 500cm<sup>2</sup> LB-carbenicillin plates. The library was recovered and  
808 pooled by scraping and column-based plasmid purification (Zymopure GigaPrep).

809

### 810 ***Preparation of virions***

811 16M 293T cells were plated onto 177cm<sup>2</sup> dishes (9x plates total). 24hrs later, cell media was  
812 replaced with 32mls of DMEM+10% FBS (D-10). Cells were transfected with the library by  
813 lipofection (per plate: 158ul lipofectamine 2000, 8mls of Optimem, 3.95µg of VSVG, 11.8µg of  
814 Pax2, 15.78µg of library). The transfection mixture was left on the cells overnight, then changed  
815 to 25mls of D-10. Viral supernatant was collected 48hrs later. Debris was removed by  
816 centrifugation at 200g. Aliquots were flash-frozen and stored at -80°C.

817

### 818 ***Validation of the Cas9-expressing cell line used for screening***

819 K562 cells were lentivirally infected with an EF1a-spCas9-T2A-blastR construct. Following  
820 10µg/ml blasticidin selection, cells were dilution cloned. Clonal isolates with high levels of cas9  
821 expression (as determined by western blot) were selected for further characterization. To determine  
822 the kinetics and efficacy of gene cutting under screening conditions (*e.g.*, low multiplicity of  
823 infection (MOI) of the sgRNA construct), cells were infected with a lentiviral construct  
824 expressing both EGFP and a sgRNA targeting GFP. Following puromycin selection, the loss of  
825 EGFP expression was monitored by flow cytometry. In other experiments, the ability to effectively  
826 deplete endogenous proteins was determined by using a series of sgRNAs targeting the mismatch  
827 repair complex and measuring protein depletion by western blot.

828

### 829 ***NK screen***

830 Five hundred million spCas9-expressing K562 cells were mixed with CRISPR sgRNA library  
831 virions and 1L of media, then distributed across 34 6-well plates. Cells were spin-infected at 1900  
832 rpm for 30 min at room-temperature with CRISPR library virus, conditions calculated to achieve  
833 a MOI of ~0.3 and 1000 cells per sgRNA library representation. MOI was measured by tracking  
834 the percent of the population expressing the cerulean marker found in the sgRNA library. Cells  
835 were incubated overnight in viral supernatant prior to being pooled, spun down to remove virions,  
836 and returned to spinner-flask culture (Bell-Flo Flask, Bellco Glass Inc). 24 to 48hrs post-infection,  
837 2µg/ml puromycin selection was started for four days. Cells were maintained in log-growth phase  
838 with a minimal representation of 500M cells. Seven days post guide-infection, NK cell challenge  
839 was initiated. For the 2.5:1 E:T challenge, 100M K562 cells were mixed with 250M NK-92 cells  
840 in 1L of Myelocult, and split across 25 177cm<sup>2</sup> dishes. For the 1:1 E:T challenge, 100M K562 cells  
841 were mixed with 100M NK-92 cells in 400mls of Myelocult, and split across 10 177cm<sup>2</sup> dishes.

842 As a control, K562 cells were continuously propagated in RPMI media. 2 days after initiating the  
843 NK-92 challenge, the co-culture was switched to RPMI media. NK-92 cells, when grown in RPMI  
844 without IL-2, are rapidly lost from the culture. Six days after the media switch, 100M cell pellets  
845 were generated for library construction. All cell pellets were stored cryopreserved in cell-freezing  
846 media (Gibco #12648).

847

#### 848 ***MHC-I screen***

849 Generation of K562 cells expressing the sgRNA library was performed as described above. On  
850 day 8 post-guide infection, 150M cells were stimulated with 10ng/ml IFN $\gamma$  (R&D Systems 285-  
851 IF). 24hrs later, cells were spun down, washed, and stained in 3mls of 1:200 anti-HLA ABC-APC  
852 (W6/32 clone, BioLegend) in PBS, 2% FBS for 30min at 4 $^{\circ}$ c. Approximately 10M of the brightest  
853 20% and dimmest 20% of cells were sorted (BD FACSAria Fusion). Cell purity was determined  
854 to be >95% by re-analysis post-sorting. A replicate of this experiment was performed on day 14  
855 post-guide infection.

856

#### 857 ***CRISPR library preparation and sequencing***

858 Genomic DNA was prepared by thawing cryopreserved cell pellets and proceeding with DNA  
859 extraction using column-based purification methods (NucleoSpin Blood XL, Machery-Nagel).  
860 Protospacer libraries were generated by a two-step PCR strategy, modified from <sup>66</sup>. In the first  
861 round of PCR, 150 $\mu$ g of gDNA (equivalent to 15M K562 cells and 125-fold coverage of the  
862 library) was used in a 7.5ml PCR reaction to amplify the protospacers. This reaction was performed  
863 using a 500nM mixture of primers containing 0-9bp staggers, to ensure base-pair diversity during  
864 Illumina sequencing (see supplemental table S7). The reaction was performed with Phusion master  
865 mix (New England Biolabs) and 3% DMSO with the following cycling conditions: 1 cycle X 30 s  
866 at 98 $^{\circ}$ C, 21 cycles X 15 s at 98 $^{\circ}$ C, 20 s at 63 $^{\circ}$ C, 15 s at 72 $^{\circ}$ C, 1 cycle X 2 min at 72 $^{\circ}$ C. In the  
867 second round of PCR, 4 $\mu$ l of the initial PCR product was used as the template in a 200 $\mu$ l PCR  
868 reaction to make the sample compatible with Illumina chemistry and to add unique I5 and I7  
869 barcodes to the sample. The reaction was performed with Phusion master mix (New England  
870 Biolabs), 500nM primers and 3% DMSO with the following cycling conditions: 1 cycle X 30 sec  
871 at 98 $^{\circ}$ C, 12 cycles X 15 s 98 $^{\circ}$ C, 20 s at 60 $^{\circ}$ C, 15 s at 72 $^{\circ}$ C, 1 cycle X 2 min at 72 $^{\circ}$ C. The library  
872 was size-selected first by a 1:1 SPRI bead selection (AMPure XP beads, Beckman Coulter),

873 quantified by high-sensitivity dsDNA Qubit (ThermoFisher Scientific), and pooled. An agarose  
874 size selection step (PippinHT, Sage Science) was performed prior to sequencing on an Illumina  
875 HiSeq4000.

876

### 877 ***Screen analysis***

878 Libraries were sequenced to a depth of ~20 million reads per condition. Reads were aligned to the  
879 sgRNA library using bowtie2. Protospacer count tables were generated from these alignments with  
880 python scripts and processed with MAGeCK. MAGeCK analysis was used to score and prioritize  
881 sgRNAs, using default settings in the algorithm<sup>23</sup>. A subset of genes, mostly from highly related  
882 gene families, have more than 6 sgRNAs targeting them. As the MAGeCK scoring method tends  
883 to prioritize consistency of effect over magnitude of effect, genes with more than 6 guides targeting  
884 them were excluded from the analysis. MAGeCK scores were  $-\log_{10}$  normalized, and values were  
885 plotted against FDR values.

886

### 887 ***NK-92 competitive co-culture assay***

888 Cas9-expressing K562 or Daudi cells were transduced at a high MOI with a lentiviral sgRNA  
889 construct expressing the guide of interest, puromycin resistance and CMV promoter-driven  
890 expression of either a red or green fluorescent protein. Knockout cell populations were maintained  
891 in a polyclonal state. Gene disruption was confirmed at the protein level by flow cytometry or  
892 western blot, and by RNA-seq when antibody reagents were not available. Complete knockout in  
893 >90% of the population was routinely achieved (Figure 2 – figure supplement 1 and Figure 3-  
894 figure supplement 1). Cells were counted and 0.25M red-labeled test cells were mixed with 0.25M  
895 green-labeled control cells (expressing a sgRNA against an olfactory receptor gene). The mixture  
896 was either grown in RPMI or mixed with 1.25M NK-92 cells in 4mls Myelocult media in 6-well  
897 plates. The ratio of green-to-red cells was measured 2 to 4 days post-challenge, with the fold-  
898 change normalized to the ratio in the non-challenged state (to control for differences in basal cell  
899 growth rate).

900

### 901 ***Primary NK cell isolation***

902 PBMCs were isolated from leukocyte-enriched blood of human donors (Stanford Blood Center).  
903 Donors were not genotyped or pre-screened for infectious disease markers. Natural killer cells



904 were isolated by negative selection using magnetic columns (Miltenyi 130-092-657). Purity post-  
905 selection was routinely >97% CD56+ CD3-. Isolated NK cells were plated at 1M/ml density in  
906 96-well u-bottom plates and stimulated overnight with 1000U/ml IL-2 in complete RPMI with  
907 10% FBS.

908

#### 909 ***Primary NK cell degranulation assay***

910 Following IL-2 activation, NK cells were counted and mixed with target cells in 96-well u-bottom  
911 plates. 100,000 NK cells were mixed with 40,000 target cells in a final volume of 200 $\mu$ l for a 2.5:1  
912 E:T ratio. Cells were co-cultured at 37°C for 2 hrs, then stained with anti-CD56-BV421 (1:200)  
913 and anti-CD107a-APC (1:200 dilution) for 30m at 4°C. CD107a expression was assayed by flow  
914 cytometry in the 7-AAD- CD56+ RFP- GFP- cell population. Primary NK cells exhibited very  
915 little basal degranulation in the absence of target cells (<1% CD107a+). The assay was repeated  
916 with 6 primary donors with technical duplicates.

917

#### 918 ***Primary NK cell competitive co-culture assay***

919 Following IL-2 activation, NK cells were counted and mixed at a 1:1 E:T ratio with RFP-labeled  
920 target cells and GFP-labeled control cells in a 96-well u-bottom plate. 50,000 NK cells were  
921 combined with 25,000 Red and 25,000 Green cells in a final volume of 200 $\mu$ l and continuously  
922 expanded in 96-well plates to as needed. The ratio of GFP+ to RFP+ cells was measured by flow  
923 cytometry on days 2 and 4 post-challenge, and the fold change was normalized to the ratio in the  
924 non-challenged state (to control for differences in basal cell growth rate). The assay was repeated  
925 with 6 primary donors with technical duplicates.

926

#### 927 ***Flow cytometry***

928 0.5 to 1M cells were spun down and stained with APC-conjugated antibodies for 30mins at 4°C in  
929 PBS with 2% FBS. Cells were analyzed on a BD LSRFortessa. The geometric mean fluorescence  
930 intensity of singlet, DAPI-excluding cells was measured, and normalized to the background  
931 fluorescence of that particular genotype of cells.

932

#### 933 ***DCAF15 rescue experiments***

934 The DCAF15 open reading frame was synthesized based off reference sequence NM\_138353, but  
935 with silent mutations designed to confer resistance to all three sgRNAs. To ensure resistance to  
936 sgRNA-directed gene cutting, silent mutations were introduced to the PAM domain and the  
937 proximal region of the protospacer (guide #1: 5' GCTGCACACCAAGTACCAGGTGG to  
938 GCTGCACACCAAaTAtCAaGTaG. Guide #2: 5' TGACATCTACGTCAGCACCGTGG to  
939 TGACATCTACGTCtcCACaGTaG; Guide #3: 3' GCAGCTTCCGGAAGAGGCGAGGG to  
940 GCAGCTTCCGGAAtaaCGtGGt).

941  
942 The rescue construct was expressed lentivirally from an EF1a promoter, with a c-terminal 3-flag  
943 epitope tag. Rescue cells were selected with hygromycin. The rescue construct was introduced two  
944 weeks after the initial introduction of the DCAF15 sgRNAs, and stable cell lines generated by a  
945 week of selection in 375µg/ml hygromycin. Expression of the construct was confirmed by lysing  
946 cells in PBS+0.1% NP40 (as per <sup>49</sup>) and western blotting for the Flag tag.

947

#### 948 ***CD80 blocking experiments***

949 RFP-labeled target cells (0, 0.75M, or 2.5M) were resuspended in 0.5mls Myelocult + 5µg/ml  
950 control (MOPC-21 clone) or blocking CD80 (2D10 clone) antibodies. Cells were incubated for 30  
951 mins at room temperature. 0.5M NK-92 cells in 0.5mls Myelocult were added to the well with  
952 1:200 anti-CD107a-APC antibody. Cells were co-cultured for 4hrs at 37°C. Flow cytometry was  
953 used to measure CD107A-APC expression in the NK-92 (RFP-negative) population. NK-92 cells  
954 were found to display a basal level of CD107a expression in the absence of effector cells. Increases  
955 above basal staining levels were used to define NK-92 degranulation. The experiment was repeated  
956 4 times to establish biological replicates.

957

#### 958 ***CD80 over-expression experiments***

959 A full-length CD80 open reading frame, based on reference sequence NM\_005191.4, was  
960 synthesized with a c-terminal 3x Flag tag and expressed lentivirally from the EF1a promoter. Over-  
961 expressing cells were selected with hygromycin. As a control construct, a mutant version of CD80  
962 was synthesized with Q65A and M72A mutations in the “V-type” Ig-like domain. Each of these  
963 residues makes contacts with CTLA4 in published CD80-CTLA4 co-crystal structures <sup>67</sup> and

964 alanine scanning experiments have shown that these residues are required for CD80 binding to  
965 CD28 or CTLA4<sup>47</sup>.

966

#### 967 ***sgRNA sequences used***

968 See supplemental table 6.

969

#### 970 ***Antibodies used***

971 See supplemental table 8.

972

#### 973 ***Cell viability after in vitro cytokine stimulation***

974 Cells were plated at 0.25M/ml in media with or without 10ng/ml IFN $\gamma$ . Every day, an aliquot of  
975 cells was counted (Vi-CELL XR, Beckman Coulter), and cells were diluted in fresh media to  
976 maintain them in logarithmic growth phase. Continuously-treated cells were re-fed with fresh  
977 10ng/ml IFN $\gamma$  every day, whereas pulse-treated cells only received 24hrs of cytokine treatment.

978

#### 979 ***Western Blotting***

980 Cells were counted, spun down and washed in PBS prior to lysis in NP40 lysis buffer (25mM  
981 HEPES pH 7.5, 150mM NaCl, 1.5mM MgCl<sub>2</sub>, 0.5% NP40, 10% glycerol, 2mM DTT) with  
982 protease and phosphatase inhibitors. Lysates were normalized by cell count and/or protein  
983 concentration. 20-40 $\mu$ g of lysates were used for western blot analysis using standard procedures.  
984 Antibody binding was detected by enhanced chemiluminescence (SuperSignal Dura, Thermo  
985 Scientific).

986

#### 987 ***RNA-sequencing analysis***

988 Cells were seeded at 0.33M/ml density. Twenty-four hours later, 2M cells were collected. RNA  
989 was first purified by TRizol extraction and then further purified using column-based methods and  
990 polyA selection. RNAseq libraries were constructed using TruSeq Stranded mRNA Library Prep  
991 Kits (Illumina) and were sequenced on an Illumina Hiseq4000 machine using 150bp paired-end  
992 reads. Transcript abundances were quantified using Salmon (v0.9.1) in pseudo-alignment mode,  
993 without adapter trimming, using the Ensembl GRCh38 transcriptome<sup>68</sup>. Differential expression  
994 analysis was performed using Sleuth (v0.29.0)<sup>69</sup>. RNA-seq analysis was executed and visualized

995 using an in-house web-based platform. RNA sequencing data is available under accession number  
996 GEO:GSE134173.

997

### 998 *Indisulam treatment*

999 Indisulam (Sigma SML1225) was reconstituted at 10mM in DMSO and stored in single use  
1000 aliquots at -80°C. For indisulam dose-response experiments, 5000 cells were plated in 384-well  
1001 plates (Greiner) and treated with indisulam over a 72hr period. A 12-point dose-response was  
1002 performed between 10µM and 4.9µM of drug, as dispensed by a Tecan D300e. Cell viability was  
1003 measured by ATP quantification (Cell Titer Glo, Promega). Dose-response measurements were  
1004 fitted to a sigmoidal curve and an IC50 determined (Prism, GraphPad Software). DCAF15  
1005 expression data from different cell lines was downloaded from the Cancer Cell Line Encyclopedia  
1006 <sup>70</sup> (<https://portals.broadinstitute.org/ccle>)

1007

1008 For low-dose indisulam experiments, cells were plated at 0.4M/ml in media with or without 100nM  
1009 indisulam (1:100,000 dilution of stock). Cells were diluted every day in fresh media and drug to  
1010 maintain them in logarithmic growth phase. Cells were analyzed for CD80 expression 96hrs after  
1011 initiation of treatment.

1012

### 1013 *AML survival analysis*

1014 FPKM RNAseq quantification for patient samples from the TARGET and TCGA LAML cohorts  
1015 was obtained from the NIH NCI Genomic Data Commons DATA portal  
1016 (<https://portal.gdc.cancer.gov/>). Clinical data for that TARGET AML and TCGA LAML cohorts  
1017 were obtained from the Genomic Data Commons DATA portal and the Broad Institute TCGA  
1018 Genome Data Analysis Center (<http://gdac.broadinstitute.org/>) respectively. Patients with  
1019 matching clinical and transcript abundance data patients were stratified by DCAF15 expression as  
1020 indicated. Survival time and vital status were defined as 'Overall Survival Time in Days' and 'Vital  
1021 Status' respectively for the Target AML cohort. For the TCGA LAML study survival time for  
1022 deceased patients ('patient.vital\_status'=dead) was defined as 'patient.days\_to\_death' while for  
1023 living patients ('patient.vital\_status'=alive) 'patient.days\_to\_last\_followup' was used for survival  
1024 time. Survival analysis and Kaplan–Meier plots were generated using lifelines software for python  
1025 (<https://doi.org/10.5281/zenodo.2584900>).

1026

1027 ***DCAF15 proximity ligation***

1028 K562 cells were infected with lentivirus expressing DCAF15-3flag-BioID-HA-T2A-BlastR,  
1029 DCAF16-3flag-BioID-HA-T2A-BlastR, or 3flag-GFP-T2A-BioID-HA-T2A-BlastR. Stable cell  
1030 lines were generated by 10 $\mu$ g/ml blasticidin selection. In triplicate, 20M cells were grown in media  
1031 supplemented with 50 $\mu$ m biotin and 5 $\mu$ m MG132. 18hrs later, cell pellets were washed three times  
1032 with ice cold PBS and lysed in mild lysis buffer (PBS 0.1% NP40 + PI/PPI), conditions determined  
1033 to maximize the solubility of over-expressed DCAF15. 1mg of clarified lysate was used for  
1034 enrichment of biotinylated species. Lysates were mixed with 60ul of streptavidin beads (Pierce  
1035 #88817) for 4hrs at 4 $^{\circ}$ c in 500 $\mu$ l total volume. Beads were collected on a magnetic column, washed  
1036 twice with 1ml RIPA buffer (25mM HEPES-KOH pH 7.4, 150mM NaCl, 1% Triton X-100, 0.5%  
1037 sodium deoxycholate, 0.1% SDS, 1mM EDTA) and three times with 1ml urea buffer (2M urea,  
1038 10mM TRIS-HCl pH 8.0).

1039

1040 For western blotting experiments, after urea washing, beads were equilibrated in mild lysis buffer.  
1041 Elution was performed by incubating the beads 15min at 23 $^{\circ}$ C, 15min at 95 $^{\circ}$ C in 30 $\mu$ l 2.5X  
1042 Laemlli buffer supplemented with 10mM biotin and 20mM DTT. The eluate was brought down to  
1043 1X concentration with lysis buffer prior to western blotting. We note that detection of total  
1044 biotinylated species by western blot was extremely sensitive to detection conditions. Membranes  
1045 were blocked for 10min in PBS, 2.5%BSA, 0.4% Triton-X 100. 1ng/ml streptavidin-HRP in  
1046 blocking buffer was added for 25min at room temperature. The membrane was washed for 15min  
1047 in PBS 0.4% TritonX-100 prior to ECL exposure.

1048

1049 To measure BioID activity after indisulam treatment, cells were treated for 48hrs with 0.1 $\mu$ m  
1050 indisulam, followed by 24hrs in indisulam with 50 $\mu$ m biotin and 5 $\mu$ m MG132.

1051

1052 ***Proteomic analysis of DCAF15 interaction partners***

1053 For proteomics experiments, after the urea buffer washes, the samples were resuspended in  
1054 denaturing buffer (8M urea, 50 mM ammonium bicarbonate pH 7.8). Proteins were reduced with  
1055 dithiothreitol (5 mM, RT, 30min) and alkylated with iodoacetamide (15 mM RT, 45 min in the  
1056 dark). Excess iodoacetamide was quenched with dithiothreitol (5 mM, room temperature, 20 min

1057 in the dark). The samples were diluted to 1 M urea using 50 mM ammonium bicarbonate and then  
1058 digested with trypsin (37°C, 16h). After protein digestion, samples were acidified with  
1059 trifluoroacetic acid to a final concentration of 0.5% and desalted using C18 StageTips<sup>71</sup>. Peptides  
1060 were eluted with 40% acetonitrile/5% formic acid then 80% acetonitrile/5% formic acid and dried  
1061 overnight under vacuum at 25°C (Labconco CentriVap Benchtop Vacuum Concentrator, Kansas  
1062 City, Mo).

1063  
1064 For tandem mass tag (TMT) labeling, dried peptides were resuspended in 50µL 200mM  
1065 HEPES/30% anhydrous acetonitrile. TMT reagents (5 mg) were dissolved in anhydrous  
1066 acetonitrile (250µL) of which 10µL was added to peptides to achieve a final acetonitrile  
1067 concentration of approximately 30% (v/v). Following incubation at room temperature for 1 h, the  
1068 reaction was quenched with 5% hydroxylamine/200mM HEPES to a final concentration of 0.3%  
1069 (v/v). The TMT labeled peptides were acidified with 50µL 1% trifluoroacetic acid and pooled prior  
1070 to desalting with SepPak (Waters) and dried under vacuum.

1071  
1072 The pooled TMT-labeled peptides were fractionated using high pH RP-HPLC. The samples were  
1073 resuspended in 5% formic acid/5% acetonitrile and fractionated over a ZORBAX extended C18  
1074 column (Agilent, 5µm particles, 4.6 mm ID and 250 mm in length). Peptides were separated on a  
1075 75-min linear gradient from 5% to 35% acetonitrile in 10mM ammonium bicarbonate at a flow  
1076 rate of 0.5mL/min on an Agilent 1260 Infinity pump equipped with a degasser and a diode array  
1077 detector (set at 214, 220, and 254nm wavelength) from Agilent Technologies (Waldbronn,  
1078 Germany). The samples were fractionated into a total of 96 fractions and then consolidated into 12  
1079 as described previously<sup>72</sup>. Samples were dried down under vacuum and reconstituted in 4%  
1080 acetonitrile/5% formic acid for LC-MS/MS processing.

1081  
1082 Peptides were analyzed on an Orbitrap Fusion Lumos mass spectrometer (Thermo Fisher  
1083 Scientific) coupled to an Easy-nLC (Thermo Fisher Scientific). Peptides were separated on a  
1084 microcapillary column (100 µm internal diameter, 25 cm long, filled using Maccel C18 AQ resin,  
1085 1.8µm, 120A; Sepax Technologies). The total LC-MS run length for each sample was 180 min  
1086 comprising a 165 min gradient from 6 to 30% acetonitrile in 0.125% formic acid. The flow rate  
1087 was 300 nL/min and the column was heated to 60°C.

1088  
1089 Data-dependent acquisition (DDA) mode was used for mass spectrometry data collection. A high  
1090 resolution MS1 scan in the Orbitrap (m/z range 500-1,200, 60k resolution, AGC  $5 \times 10^5$ , max  
1091 injection time 100 ms, RF for S-lens 30) was collected from which the top 10 precursors were  
1092 selected for MS2 analysis followed by MS3 analysis. For MS2 spectra, ions were isolated using a  
1093 0.5 m/z window using the mass filter. The MS2 scan was performed in the quadrupole ion trap  
1094 (CID, AGC  $1 \times 10^4$ , normalized collision energy 30%, max injection time 35 ms) and the MS3  
1095 scan was analyzed in the Orbitrap (HCD, 60k resolution, max AGC  $5 \times 10^4$ , max injection time  
1096 250 ms, normalized collision energy 50). For TMT reporter ion quantification, up to six fragment  
1097 ions from each MS2 spectrum were selected for MS3 analysis using synchronous precursor  
1098 selection (SPS).

1099  
1100 Mass spectrometry data were processed using an in-house software pipeline <sup>73</sup>. Raw files were  
1101 converted to mzXML files and searched against a composite human uniprot database (downloaded  
1102 on 29th March 2017) containing sequences in forward and reverse orientations using the Sequest  
1103 algorithm. Database searching matched MS/MS spectra with fully tryptic peptides from this  
1104 composite dataset with a precursor ion tolerance of 20 ppm and a product ion tolerance of 0.6 Da.  
1105 Carbamidomethylation of cysteine residues (+57.02146 Da) and TMT tags of peptide N-termini  
1106 (+229.162932 Da) were set as static modifications. Oxidation of methionines (+15.99492 Da) was  
1107 set as a variable modification. Linear discriminant analysis was used to filter peptide spectral  
1108 matches to a 1 % FDR (false discovery rate) as described previously <sup>73</sup>. Non-unique peptides that  
1109 matched to multiple proteins were assigned to proteins that contained the largest number of  
1110 matched redundant peptides sequences using the principle of Occam's razor <sup>73</sup>.

1111  
1112 Quantification of TMT reporter ion intensities was performed by extracting the most intense ion  
1113 within a 0.003 m/z window at the predicted m/z value for each reporter ion. TMT spectra were  
1114 used for quantification when the sum of the signal-to-noise for all the reporter ions was greater  
1115 than 200 and the isolation specificity was greater than 0.75 <sup>74</sup>.

1116  
1117 Base 2 logarithm of protein fold-changes were estimated by fitting a previously described Bayesian  
1118 model <sup>75</sup> to the peptide level intensities. Protein estimates are reported as the mean of the posterior



1119 distribution for each parameter. Similarly, coefficients of variation are calculated by taking the  
1120 posterior variance divided by the posterior mean. The probability of a small change (“P<sub>null</sub>”) was  
1121 estimated as the frequency of posterior samples that fall within the interval (-1,1) on the log<sub>2</sub> scale.

1122

### 1123 ***Polyubiquitination assay***

1124 Experiments were performed as per <sup>76</sup>. One million 293Ts were plated in 6-well dishes overnight.  
1125 Cells were transfected with 500ng of plasmids containing CMV-6his-ubiquitin, CMV-3fl-EGFP,  
1126 EF1A-DCAF15-3fl and/or CMV-SMC1A-HA. The SMC1A open reading frame was synthesized  
1127 based on reference sequence NM\_006306.3. After 36hrs, cells were treated with 2μM indisulam  
1128 and/or 10μM MG132. 12hrs later, replicate wells were harvested for whole-cell lysates or for Ni-  
1129 NTA pulldowns. Whole-cell lysates were made by extraction in 500μl NP40 lysis buffer. For Ni-  
1130 NTA pulldowns, cells were solubilized in 700μl of guanidine buffer (6M guanidine-HCL, 0.1M  
1131 Na<sub>2</sub>HPO<sub>4</sub>/NaH<sub>2</sub>PO<sub>4</sub>, 10mM imidazole, 0.05% TWEEN 20, pH 8.0), run through QIAshredder  
1132 columns (Qiagen) and briefly sonicated. Purifications of 6his-ubiquinated species were performed  
1133 as described in <sup>76</sup>, except for the use of magnetic Ni-NTA beads (Thermo Fisher Scientific 88831)  
1134 and the addition of 0.05% TWEEN 20 to wash buffers.

1135

### 1136 ***Data processing***

1137 Unless otherwise specified, data was graphed and statistically analyzed using Prism (GraphPad  
1138 Software). Sample size was not predetermined, No outliers were excluded. Unless otherwise noted,  
1139 all data points represent biological replicates rather than technical replicates. We define ‘technical  
1140 replicates’ as running an assay multiple times on the exact same sample.

1141

### 1142 **Acknowledgements**

1143 We thank Jonathan Paw for flow cytometry and cell sorting; Margaret Roy, Andrea Ireland,  
1144 Twaritha Vijay, Nicole Fong for next-generation sequencing; Adam Baker and Matt Sooknah for  
1145 RNA-seq data visualization; Hugo Hilton, David Stokoe, and Robert Cohen for critical reading of  
1146 the manuscript, and members of the Calico Oncology group for helpful discussion.

1147

### 1148 **Competing Interests**

1149 All authors are employees of Calico Life Sciences, LLC.

1150

1151 **References**

1152

- 1153 1 Snyder, A. *et al.* Genetic basis for clinical response to CTLA-4 blockade in melanoma. *N*  
1154 *Engl J Med* **371**, 2189-2199, doi:10.1056/NEJMoa1406498 (2014).
- 1155 2 Tumei, P. C. *et al.* PD-1 blockade induces responses by inhibiting adaptive immune  
1156 resistance. *Nature* **515**, 568-571, doi:10.1038/nature13954 (2014).
- 1157 3 Mariathasan, S. *et al.* TGFbeta attenuates tumour response to PD-L1 blockade by  
1158 contributing to exclusion of T cells. *Nature* **554**, 544-548, doi:10.1038/nature25501  
1159 (2018).
- 1160 4 Galon, J. & Bruni, D. Approaches to treat immune hot, altered and cold tumours with  
1161 combination immunotherapies. *Nat Rev Drug Discov*, doi:10.1038/s41573-018-0007-y  
1162 (2019).
- 1163 5 Easwaran, H., Tsai, H. C. & Baylin, S. B. Cancer epigenetics: tumor heterogeneity,  
1164 plasticity of stem-like states, and drug resistance. *Mol Cell* **54**, 716-727,  
1165 doi:10.1016/j.molcel.2014.05.015 (2014).
- 1166 6 Zaretsky, J. M. *et al.* Mutations Associated with Acquired Resistance to PD-1 Blockade in  
1167 Melanoma. *N Engl J Med* **375**, 819-829, doi:10.1056/NEJMoa1604958 (2016).
- 1168 7 Sade-Feldman, M. *et al.* Resistance to checkpoint blockade therapy through inactivation  
1169 of antigen presentation. *Nat Commun* **8**, 1136, doi:10.1038/s41467-017-01062-w  
1170 (2017).
- 1171 8 Kearney, C. J. *et al.* Tumor immune evasion arises through loss of TNF sensitivity. *Sci*  
1172 *Immunol* **3**, doi:10.1126/sciimmunol.aar3451 (2018).
- 1173 9 Pan, D. *et al.* A major chromatin regulator determines resistance of tumor cells to T cell-  
1174 mediated killing. *Science* **359**, 770-775, doi:10.1126/science.aao1710 (2018).
- 1175 10 Manguso, R. T. *et al.* In vivo CRISPR screening identifies Ptpn2 as a cancer  
1176 immunotherapy target. *Nature* **547**, 413-418, doi:10.1038/nature23270 (2017).
- 1177 11 Patel, S. J. *et al.* Identification of essential genes for cancer immunotherapy. *Nature* **548**,  
1178 537-542, doi:10.1038/nature23477 (2017).
- 1179 12 Dunn, G. P., Old, L. J. & Schreiber, R. D. The immunobiology of cancer  
1180 immunosurveillance and immunoediting. *Immunity* **21**, 137-148,  
1181 doi:10.1016/j.immuni.2004.07.017 (2004).
- 1182 13 Rodig, S. J. *et al.* MHC proteins confer differential sensitivity to CTLA-4 and PD-1  
1183 blockade in untreated metastatic melanoma. *Sci Transl Med* **10**,  
1184 doi:10.1126/scitranslmed.aar3342 (2018).
- 1185 14 Gao, J. *et al.* Loss of IFN-gamma Pathway Genes in Tumor Cells as a Mechanism of  
1186 Resistance to Anti-CTLA-4 Therapy. *Cell* **167**, 397-404 e399,  
1187 doi:10.1016/j.cell.2016.08.069 (2016).
- 1188 15 McGranahan, N. *et al.* Allele-Specific HLA Loss and Immune Escape in Lung Cancer  
1189 Evolution. *Cell* **171**, 1259-1271 e1211, doi:10.1016/j.cell.2017.10.001 (2017).
- 1190 16 Marcus, A. *et al.* Recognition of tumors by the innate immune system and natural killer  
1191 cells. *Adv Immunol* **122**, 91-128, doi:10.1016/B978-0-12-800267-4.00003-1 (2014).

- 1192 17 Moynihan, K. D. *et al.* Eradication of large established tumors in mice by combination  
1193 immunotherapy that engages innate and adaptive immune responses. *Nat Med* **22**,  
1194 1402-1410, doi:10.1038/nm.4200 (2016).
- 1195 18 Lopez-Soto, A., Gonzalez, S., Smyth, M. J. & Galluzzi, L. Control of Metastasis by NK Cells.  
1196 *Cancer Cell* **32**, 135-154, doi:10.1016/j.ccell.2017.06.009 (2017).
- 1197 19 Chiossone, L., Dumas, P. Y., Vienne, M. & Vivier, E. Natural killer cells and other innate  
1198 lymphoid cells in cancer. *Nat Rev Immunol* **18**, 671-688, doi:10.1038/s41577-018-0061-z  
1199 (2018).
- 1200 20 Ljunggren, H. G. & Malmberg, K. J. Prospects for the use of NK cells in immunotherapy of  
1201 human cancer. *Nat Rev Immunol* **7**, 329-339, doi:10.1038/nri2073 (2007).
- 1202 21 Klingemann, H. G. *et al.* Establishment and characterization of a human leukemic cell  
1203 line (SR-91) with features suggestive of early hematopoietic progenitor cell origin. *Leuk*  
1204 *Lymphoma* **12**, 463-470, doi:10.3109/10428199409073789 (1994).
- 1205 22 Maki, G., Klingemann, H. G., Martinson, J. A. & Tam, Y. K. Factors regulating the  
1206 cytotoxic activity of the human natural killer cell line, NK-92. *J Hematother Stem Cell Res*  
1207 **10**, 369-383, doi:10.1089/152581601750288975 (2001).
- 1208 23 Li, W. *et al.* MAGeCK enables robust identification of essential genes from genome-scale  
1209 CRISPR/Cas9 knockout screens. *Genome Biol* **15**, 554, doi:10.1186/s13059-014-0554-4  
1210 (2014).
- 1211 24 Brandt, C. S. *et al.* The B7 family member B7-H6 is a tumor cell ligand for the activating  
1212 natural killer cell receptor NKp30 in humans. *J Exp Med* **206**, 1495-1503,  
1213 doi:10.1084/jem.20090681 (2009).
- 1214 25 Selvaraj, P. *et al.* The T lymphocyte glycoprotein CD2 binds the cell surface ligand LFA-3.  
1215 *Nature* **326**, 400-403, doi:10.1038/326400a0 (1987).
- 1216 26 Rolle, A. *et al.* CD2-CD58 interactions are pivotal for the activation and function of  
1217 adaptive natural killer cells in human cytomegalovirus infection. *Eur J Immunol* **46**, 2420-  
1218 2425, doi:10.1002/eji.201646492 (2016).
- 1219 27 Martin, M. *et al.* CD84 functions as a homophilic adhesion molecule and enhances IFN-  
1220 gamma secretion: adhesion is mediated by Ig-like domain 1. *J Immunol* **167**, 3668-3676  
1221 (2001).
- 1222 28 Veillette, A. Immune regulation by SLAM family receptors and SAP-related adaptors. *Nat*  
1223 *Rev Immunol* **6**, 56-66, doi:10.1038/nri1761 (2006).
- 1224 29 Wang, N. *et al.* Cutting edge: The adapters EAT-2A and -2B are positive regulators of  
1225 CD244- and CD84-dependent NK cell functions in the C57BL/6 mouse. *J Immunol* **185**,  
1226 5683-5687, doi:10.4049/jimmunol.1001974 (2010).
- 1227 30 Stanietsky, N. *et al.* The interaction of TIGIT with PVR and PVRL2 inhibits human NK cell  
1228 cytotoxicity. *Proc Natl Acad Sci U S A* **106**, 17858-17863, doi:10.1073/pnas.0903474106  
1229 (2009).
- 1230 31 Bottino, C. *et al.* Identification of PVR (CD155) and Nectin-2 (CD112) as cell surface  
1231 ligands for the human DNAM-1 (CD226) activating molecule. *J Exp Med* **198**, 557-567,  
1232 doi:10.1084/jem.20030788 (2003).
- 1233 32 Jin, J., Arias, E. E., Chen, J., Harper, J. W. & Walter, J. C. A family of diverse Cul4-Ddb1-  
1234 interacting proteins includes Cdt2, which is required for S phase destruction of the  
1235 replication factor Cdt1. *Mol Cell* **23**, 709-721, doi:10.1016/j.molcel.2006.08.010 (2006).

- 1236 33 Jackson, S. & Xiong, Y. CRL4s: the CUL4-RING E3 ubiquitin ligases. *Trends Biochem Sci* **34**,  
1237 562-570, doi:10.1016/j.tibs.2009.07.002 (2009).
- 1238 34 Uhlmann, F. SMC complexes: from DNA to chromosomes. *Nat Rev Mol Cell Biol* **17**, 399-  
1239 412, doi:10.1038/nrm.2016.30 (2016).
- 1240 35 Mazumdar, C. & Majeti, R. The role of mutations in the cohesin complex in acute  
1241 myeloid leukemia. *Int J Hematol* **105**, 31-36, doi:10.1007/s12185-016-2119-7 (2017).
- 1242 36 Chen, E., Karr, R. W., Frost, J. P., Gonwa, T. A. & Ginder, G. D. Gamma interferon and 5-  
1243 azacytidine cause transcriptional elevation of class I major histocompatibility complex  
1244 gene expression in K562 leukemia cells in the absence of differentiation. *Mol Cell Biol* **6**,  
1245 1698-1705 (1986).
- 1246 37 Chen, L. & Flies, D. B. Molecular mechanisms of T cell co-stimulation and co-inhibition.  
1247 *Nat Rev Immunol* **13**, 227-242, doi:10.1038/nri3405 (2013).
- 1248 38 Acuto, O. & Michel, F. CD28-mediated co-stimulation: a quantitative support for TCR  
1249 signalling. *Nat Rev Immunol* **3**, 939-951, doi:10.1038/nri1248 (2003).
- 1250 39 Lindner, I. *et al.* Induced dendritic cell differentiation of chronic myeloid leukemia blasts  
1251 is associated with down-regulation of BCR-ABL. *J Immunol* **171**, 1780-1791 (2003).
- 1252 40 Townsend, S. E. & Allison, J. P. Tumor rejection after direct costimulation of CD8+ T cells  
1253 by B7-transfected melanoma cells. *Science* **259**, 368-370 (1993).
- 1254 41 Chen, L. *et al.* Costimulation of antitumor immunity by the B7 counterreceptor for the T  
1255 lymphocyte molecules CD28 and CTLA-4. *Cell* **71**, 1093-1102 (1992).
- 1256 42 Wilson, J. L. *et al.* NK cell triggering by the human costimulatory molecules CD80 and  
1257 CD86. *J Immunol* **163**, 4207-4212 (1999).
- 1258 43 Galea-Lauri, J. *et al.* Expression of a variant of CD28 on a subpopulation of human NK  
1259 cells: implications for B7-mediated stimulation of NK cells. *J Immunol* **163**, 62-70 (1999).
- 1260 44 Chambers, B. J., Salcedo, M. & Ljunggren, H. G. Triggering of natural killer cells by the  
1261 costimulatory molecule CD80 (B7-1). *Immunity* **5**, 311-317 (1996).
- 1262 45 Azuma, M., Cayabyab, M., Buck, D., Phillips, J. H. & Lanier, L. L. Involvement of CD28 in  
1263 MHC-unrestricted cytotoxicity mediated by a human natural killer leukemia cell line. *J*  
1264 *Immunol* **149**, 1115-1123 (1992).
- 1265 46 Martin-Fontecha, A., Assarsson, E., Carbone, E., Karre, K. & Ljunggren, H. G. Triggering of  
1266 murine NK cells by CD40 and CD86 (B7-2). *J Immunol* **162**, 5910-5916 (1999).
- 1267 47 Peach, R. J. *et al.* Both extracellular immunoglobulin-like domains of CD80 contain  
1268 residues critical for binding T cell surface receptors CTLA-4 and CD28. *J Biol Chem* **270**,  
1269 21181-21187 (1995).
- 1270 48 Assi, R. *et al.* Final results of a phase 2, open-label study of indisulam, idarubicin, and  
1271 cytarabine in patients with relapsed or refractory acute myeloid leukemia and high-risk  
1272 myelodysplastic syndrome. *Cancer* **124**, 2758-2765, doi:10.1002/cncr.31398 (2018).
- 1273 49 Han, T. *et al.* Anticancer sulfonamides target splicing by inducing RBM39 degradation via  
1274 recruitment to DCAF15. *Science* **356**, doi:10.1126/science.aal3755 (2017).
- 1275 50 Uehara, T. *et al.* Selective degradation of splicing factor CAPERalpha by anticancer  
1276 sulfonamides. *Nat Chem Biol* **13**, 675-680, doi:10.1038/nchembio.2363 (2017).
- 1277 51 Ito, T. *et al.* Identification of a primary target of thalidomide teratogenicity. *Science* **327**,  
1278 1345-1350, doi:10.1126/science.1177319 (2010).

- 1279 52 Fischer, E. S. *et al.* Structure of the DDB1-CRBN E3 ubiquitin ligase in complex with  
1280 thalidomide. *Nature* **512**, 49-53, doi:10.1038/nature13527 (2014).
- 1281 53 Kronke, J. *et al.* Lenalidomide causes selective degradation of IKZF1 and IKZF3 in  
1282 multiple myeloma cells. *Science* **343**, 301-305, doi:10.1126/science.1244851 (2014).
- 1283 54 Bolouri, H. *et al.* The molecular landscape of pediatric acute myeloid leukemia reveals  
1284 recurrent structural alterations and age-specific mutational interactions. *Nat Med* **24**,  
1285 103-112, doi:10.1038/nm.4439 (2018).
- 1286 55 Cancer Genome Atlas Research, N. *et al.* Genomic and epigenomic landscapes of adult  
1287 de novo acute myeloid leukemia. *N Engl J Med* **368**, 2059-2074,  
1288 doi:10.1056/NEJMoa1301689 (2013).
- 1289 56 Roux, K. J., Kim, D. I., Raida, M. & Burke, B. A promiscuous biotin ligase fusion protein  
1290 identifies proximal and interacting proteins in mammalian cells. *J Cell Biol* **196**, 801-810,  
1291 doi:10.1083/jcb.201112098 (2012).
- 1292 57 Luo, N. *et al.* Melanoma response to anti-PD-L1 immunotherapy requires JAK1 signaling,  
1293 but not JAK2. *Oncoimmunology* **7**, e1438106, doi:10.1080/2162402X.2018.1438106  
1294 (2018).
- 1295 58 Ferlazzo, G. & Munz, C. NK cell compartments and their activation by dendritic cells. *J*  
1296 *Immunol* **172**, 1333-1339, doi:10.4049/jimmunol.172.3.1333 (2004).
- 1297 59 O'Connell, B. C. & Harper, J. W. Ubiquitin proteasome system (UPS): what can chromatin  
1298 do for you? *Curr Opin Cell Biol* **19**, 206-214, doi:10.1016/j.ceb.2007.02.014 (2007).
- 1299 60 Litwin, I., Pilarczyk, E. & Wysocki, R. The Emerging Role of Cohesin in the DNA Damage  
1300 Response. *Genes (Basel)* **9**, doi:10.3390/genes9120581 (2018).
- 1301 61 Chandrashekar, D. S. *et al.* UALCAN: A Portal for Facilitating Tumor Subgroup Gene  
1302 Expression and Survival Analyses. *Neoplasia* **19**, 649-658, doi:10.1016/j.neo.2017.05.002  
1303 (2017).
- 1304 62 Doench, J. G. *et al.* Optimized sgRNA design to maximize activity and minimize off-target  
1305 effects of CRISPR-Cas9. *Nat Biotechnol* **34**, 184-191, doi:10.1038/nbt.3437 (2016).
- 1306 63 Sanjana, N. E., Shalem, O. & Zhang, F. Improved vectors and genome-wide libraries for  
1307 CRISPR screening. *Nat Methods* **11**, 783-784, doi:10.1038/nmeth.3047 (2014).
- 1308 64 Grigaitė, R., Maneliene, Z. & Janulaitis, A. AarI, a restriction endonuclease from  
1309 *Arthrobacter aurescens* SS2-322, which recognizes the novel non-palindromic sequence  
1310 5'-CACCTGC(N)<sub>4</sub>/8-3'. *Nucleic Acids Res* **30**, e123 (2002).
- 1311 65 Chen, B. *et al.* Dynamic imaging of genomic loci in living human cells by an optimized  
1312 CRISPR/Cas system. *Cell* **155**, 1479-1491, doi:10.1016/j.cell.2013.12.001 (2013).
- 1313 66 van Overbeek, M. *et al.* DNA Repair Profiling Reveals Nonrandom Outcomes at Cas9-  
1314 Mediated Breaks. *Mol Cell* **63**, 633-646, doi:10.1016/j.molcel.2016.06.037 (2016).
- 1315 67 Stamper, C. C. *et al.* Crystal structure of the B7-1/CTLA-4 complex that inhibits human  
1316 immune responses. *Nature* **410**, 608-611, doi:10.1038/35069118 (2001).
- 1317 68 Patro, R., Duggal, G., Love, M. I., Irizarry, R. A. & Kingsford, C. Salmon provides fast and  
1318 bias-aware quantification of transcript expression. *Nat Methods* **14**, 417-419,  
1319 doi:10.1038/nmeth.4197 (2017).
- 1320 69 Pimentel, H., Bray, N. L., Puente, S., Melsted, P. & Pachter, L. Differential analysis of  
1321 RNA-seq incorporating quantification uncertainty. *Nat Methods* **14**, 687-690,  
1322 doi:10.1038/nmeth.4324 (2017).



- 1323 70 Barretina, J. *et al.* The Cancer Cell Line Encyclopedia enables predictive modelling of  
1324 anticancer drug sensitivity. *Nature* **483**, 603-607, doi:10.1038/nature11003 (2012).
- 1325 71 Rappsilber, J., Mann, M. & Ishihama, Y. Protocol for micro-purification, enrichment, pre-  
1326 fractionation and storage of peptides for proteomics using StageTips. *Nat Protoc* **2**,  
1327 1896-1906, doi:10.1038/nprot.2007.261 (2007).
- 1328 72 Edwards, A. & Haas, W. Multiplexed Quantitative Proteomics for High-Throughput  
1329 Comprehensive Proteome Comparisons of Human Cell Lines. *Methods Mol Biol* **1394**, 1-  
1330 13, doi:10.1007/978-1-4939-3341-9\_1 (2016).
- 1331 73 Huttlin, E. L. *et al.* A tissue-specific atlas of mouse protein phosphorylation and  
1332 expression. *Cell* **143**, 1174-1189, doi:10.1016/j.cell.2010.12.001 (2010).
- 1333 74 Ting, L., Rad, R., Gygi, S. P. & Haas, W. MS3 eliminates ratio distortion in isobaric  
1334 multiplexed quantitative proteomics. *Nat Methods* **8**, 937-940, doi:10.1038/nmeth.1714  
1335 (2011).
- 1336 75 O'Brien, J. J. *et al.* Compositional Proteomics: Effects of Spatial Constraints on Protein  
1337 Quantification Utilizing Isobaric Tags. *J Proteome Res* **17**, 590-599,  
1338 doi:10.1021/acs.jproteome.7b00699 (2018).
- 1339 76 Lu, G. *et al.* The myeloma drug lenalidomide promotes the cereblon-dependent  
1340 destruction of Ikaros proteins. *Science* **343**, 305-309, doi:10.1126/science.1244917  
1341 (2014).  
1342

**A**

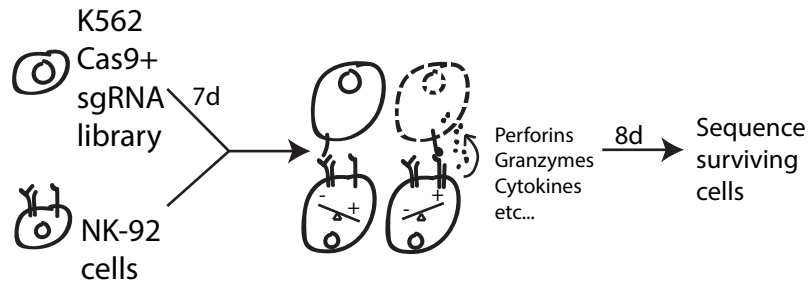

**B**

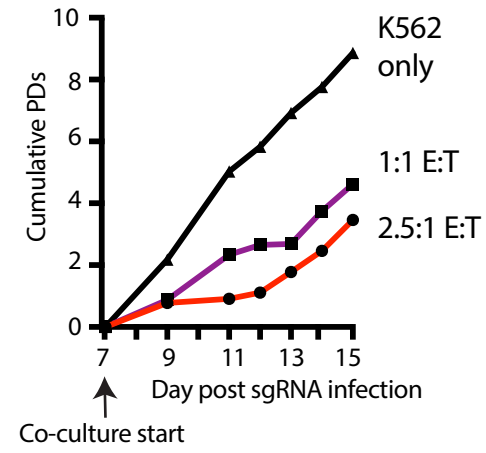

**C**

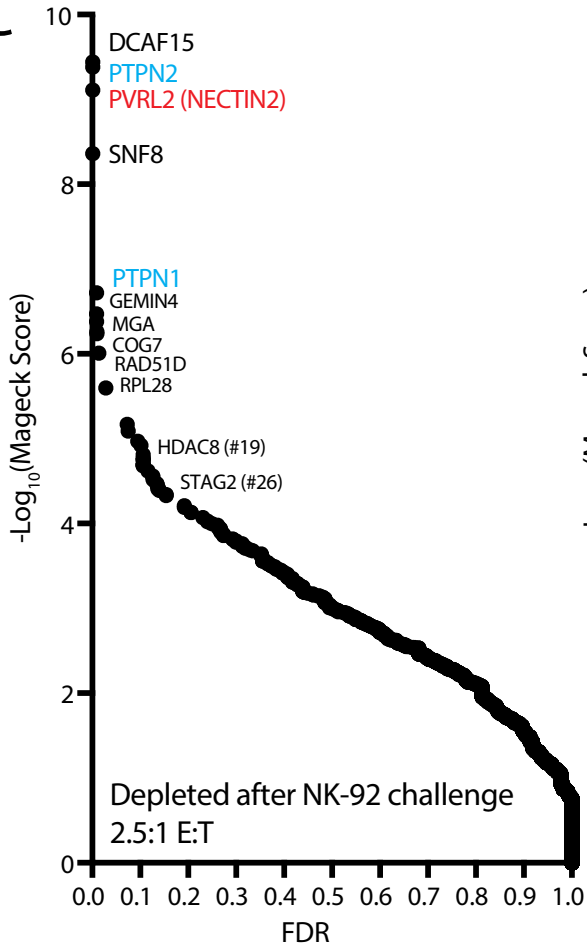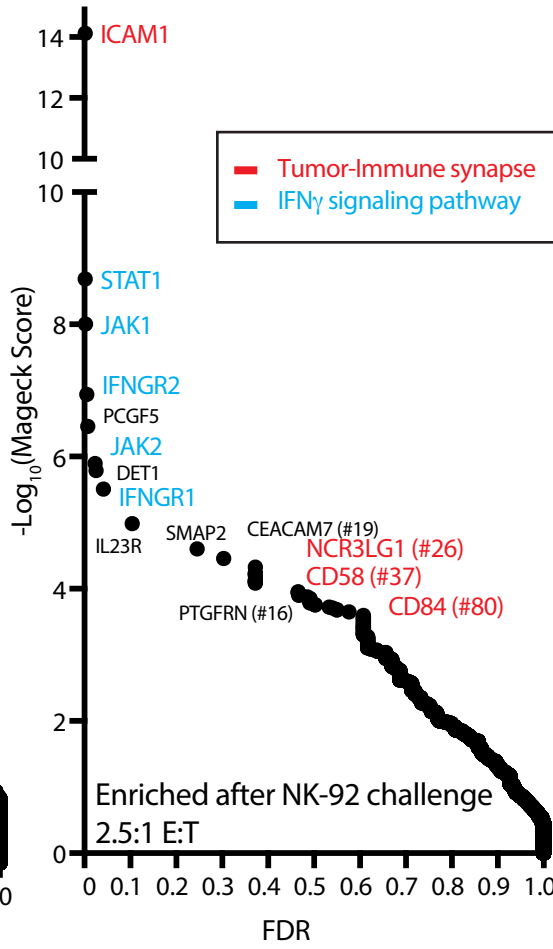

**D**

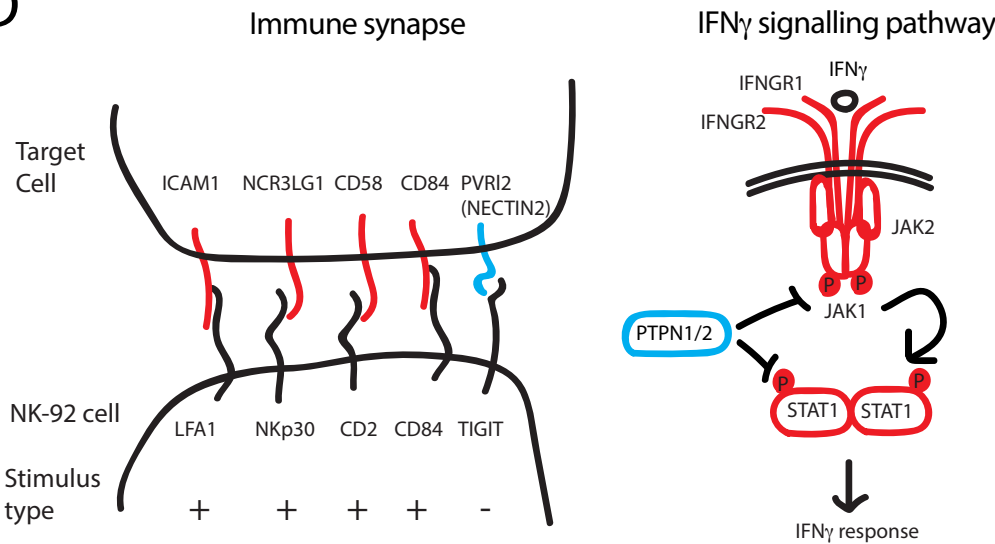

**Fig. 1**



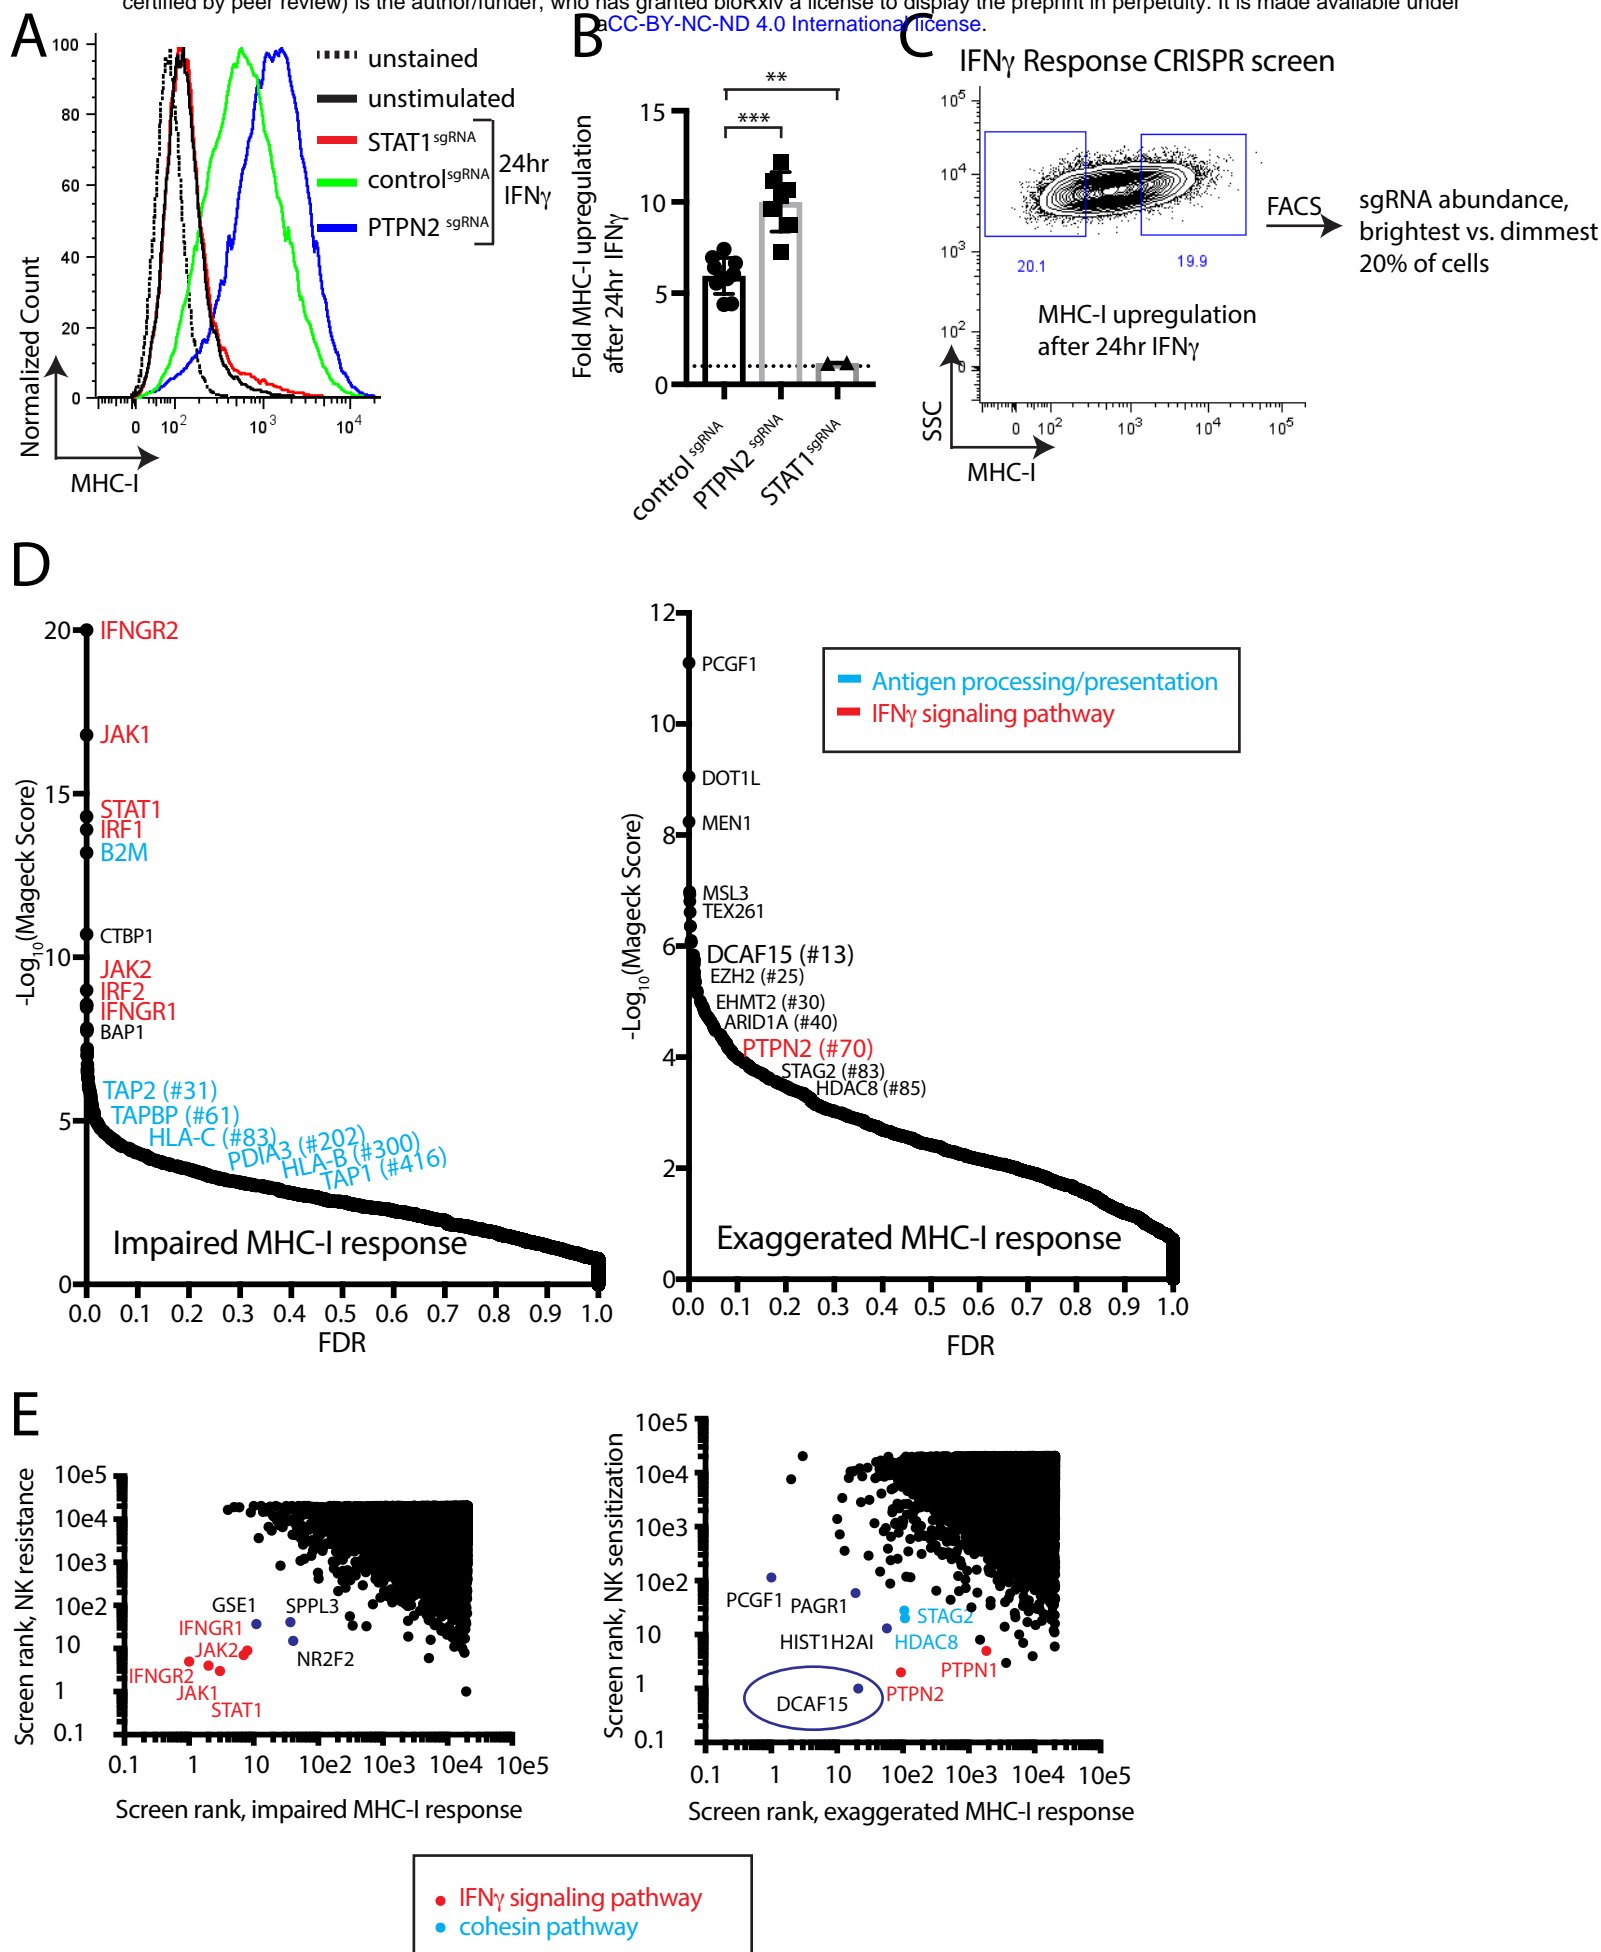

Fig. 2

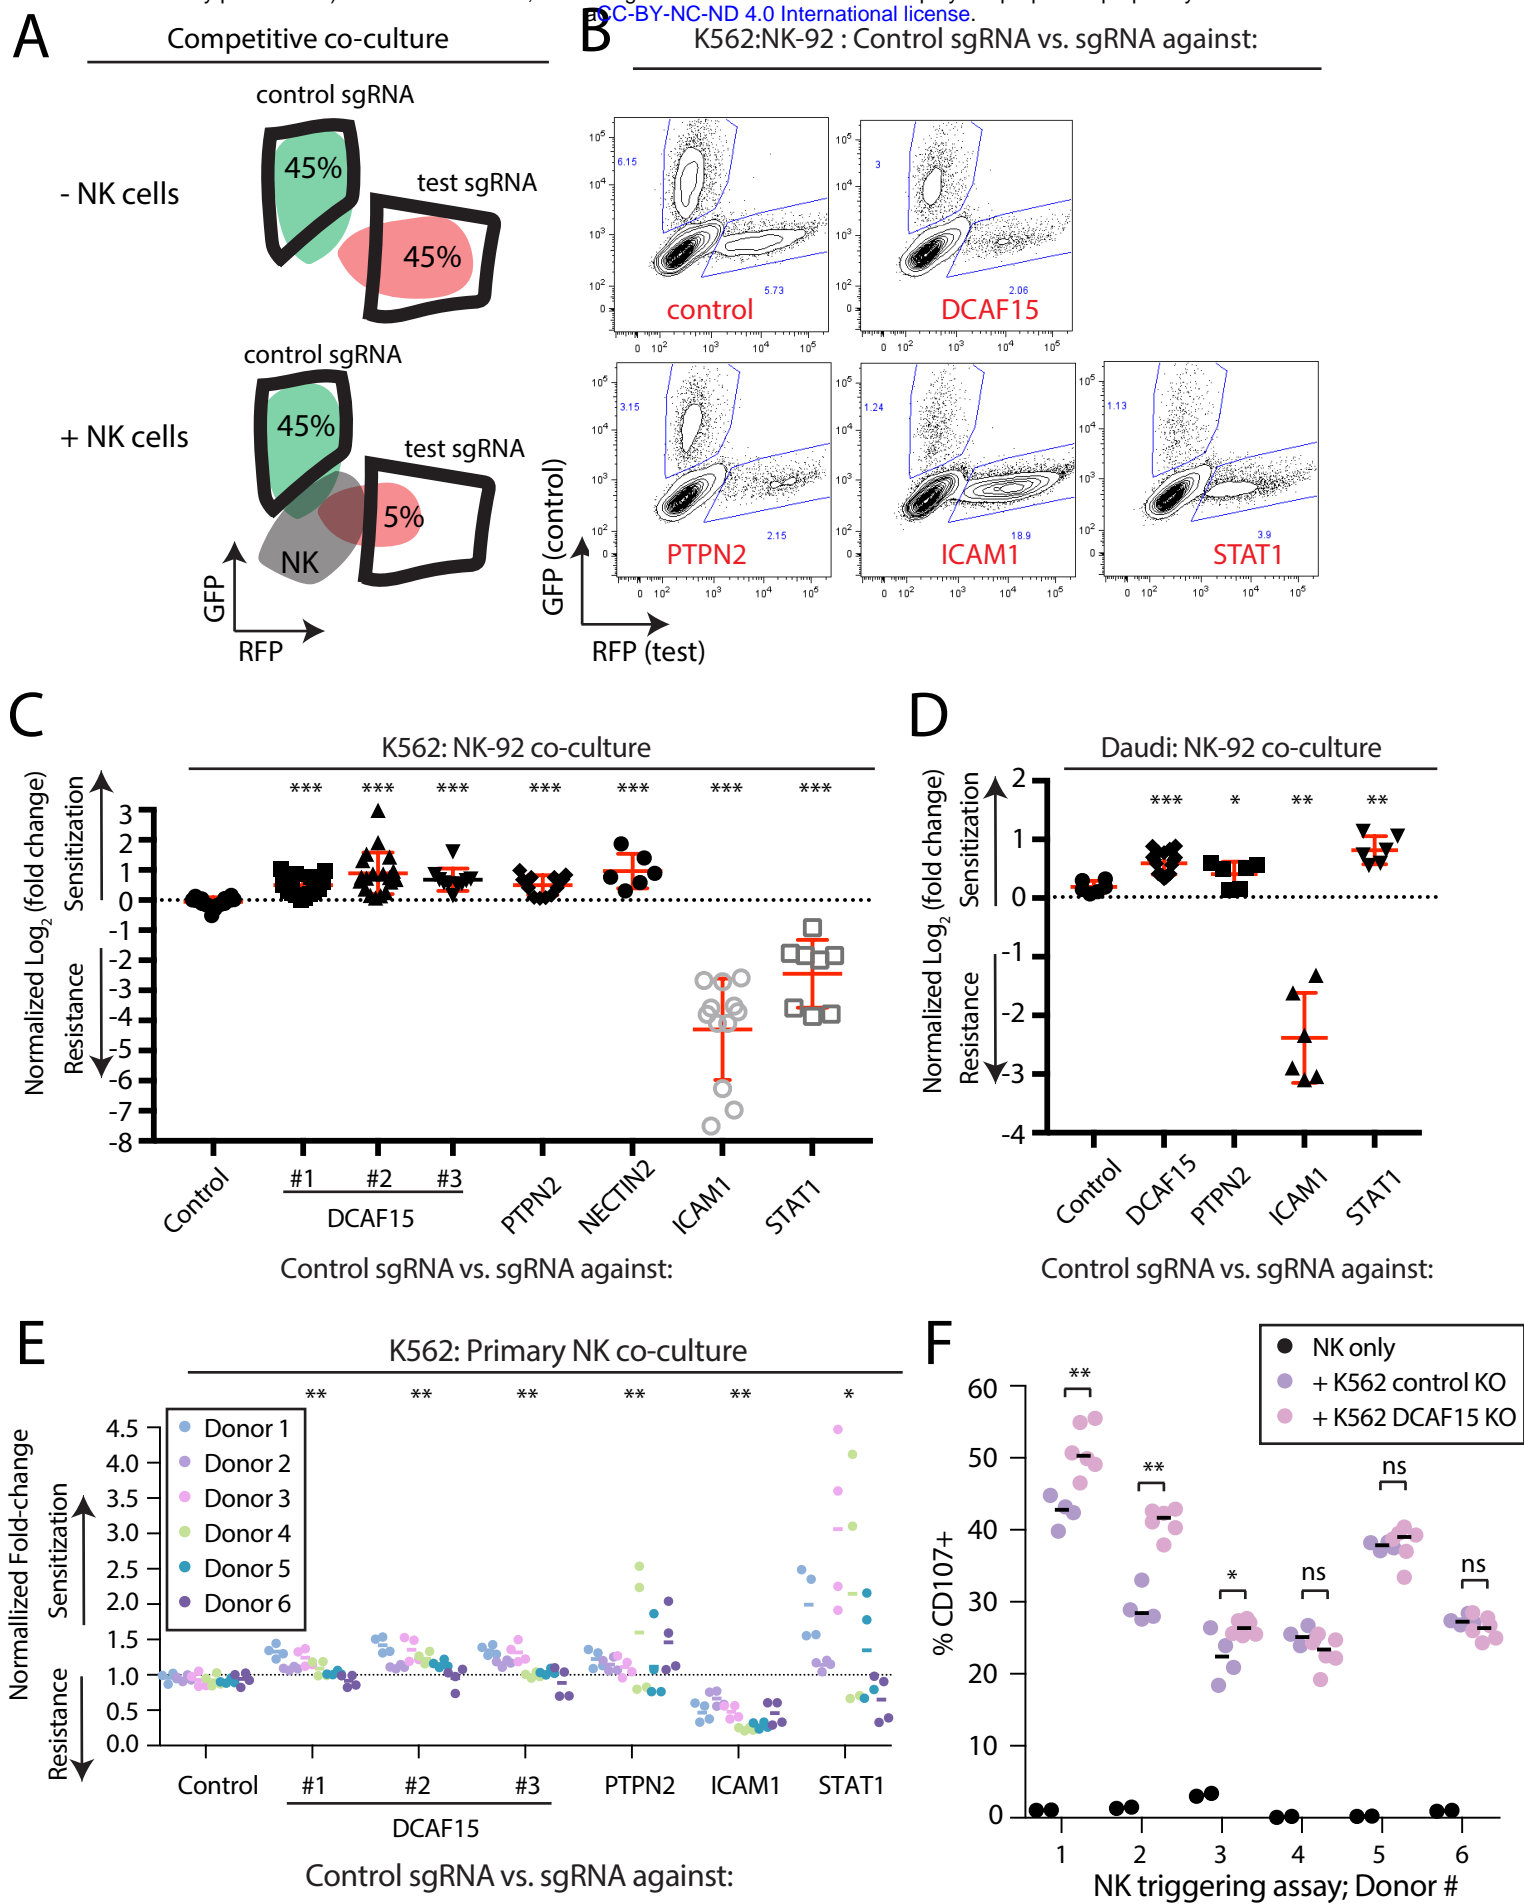

Fig. 3

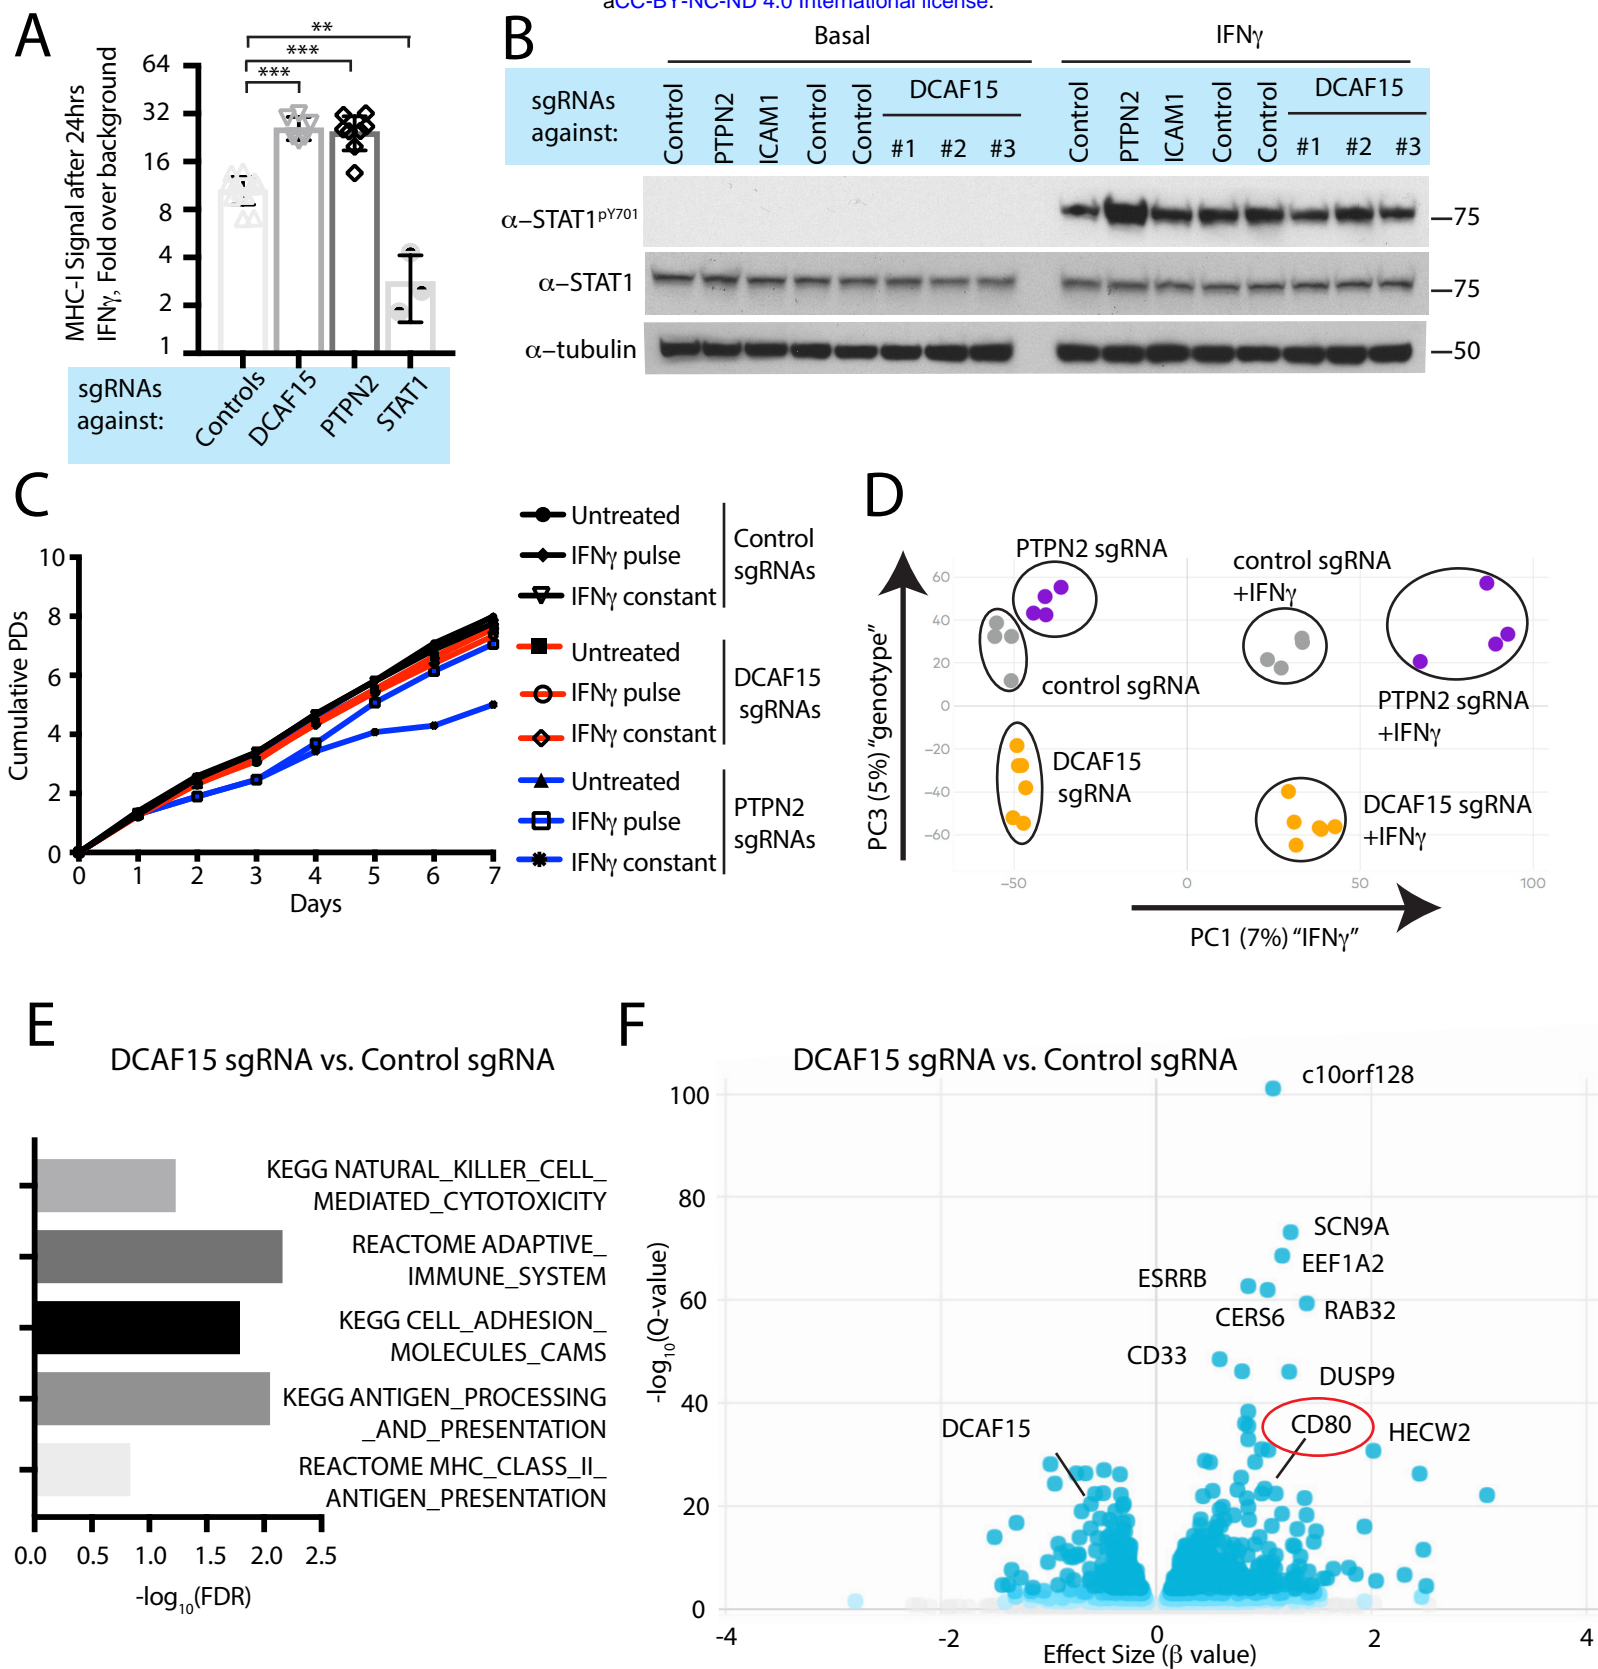

Fig. 4

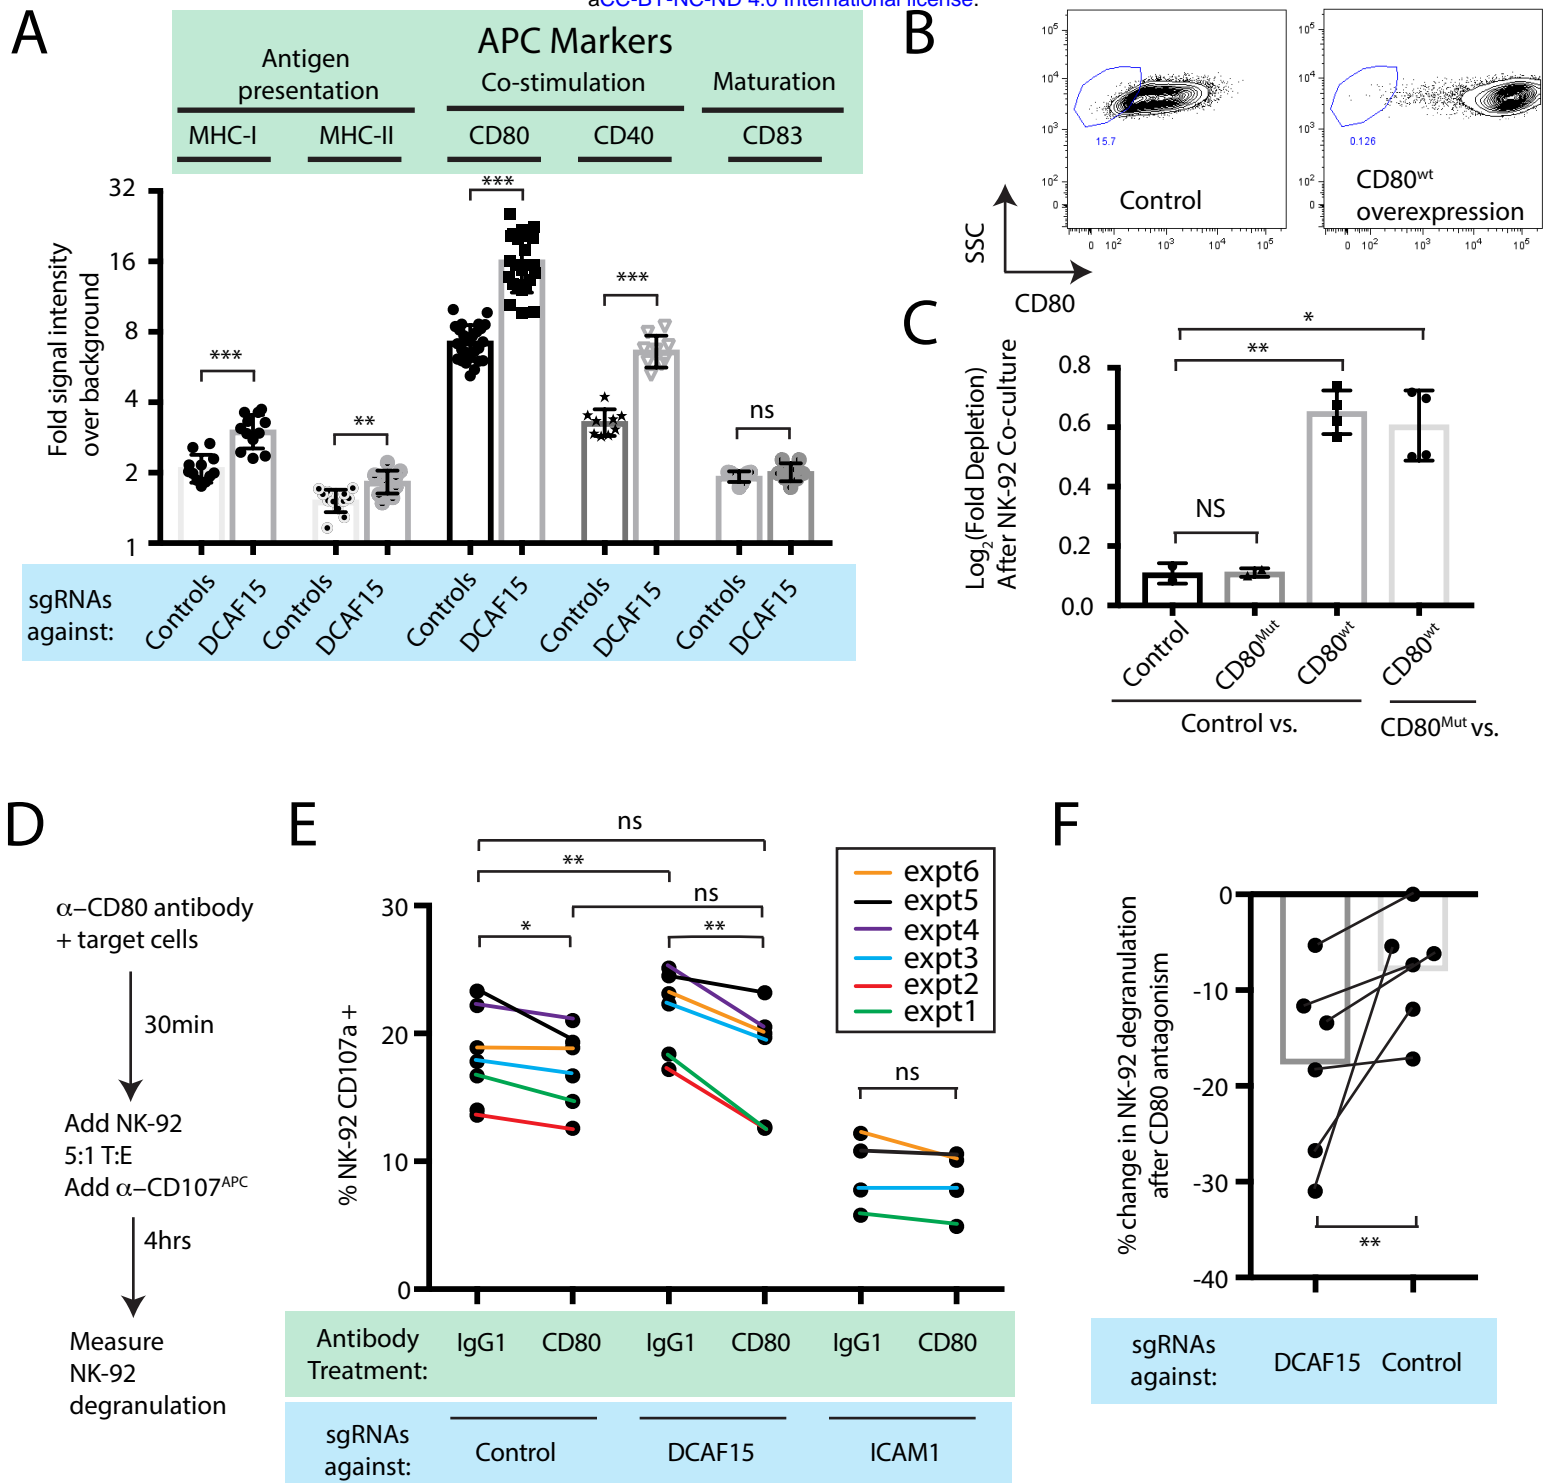

Fig. 5

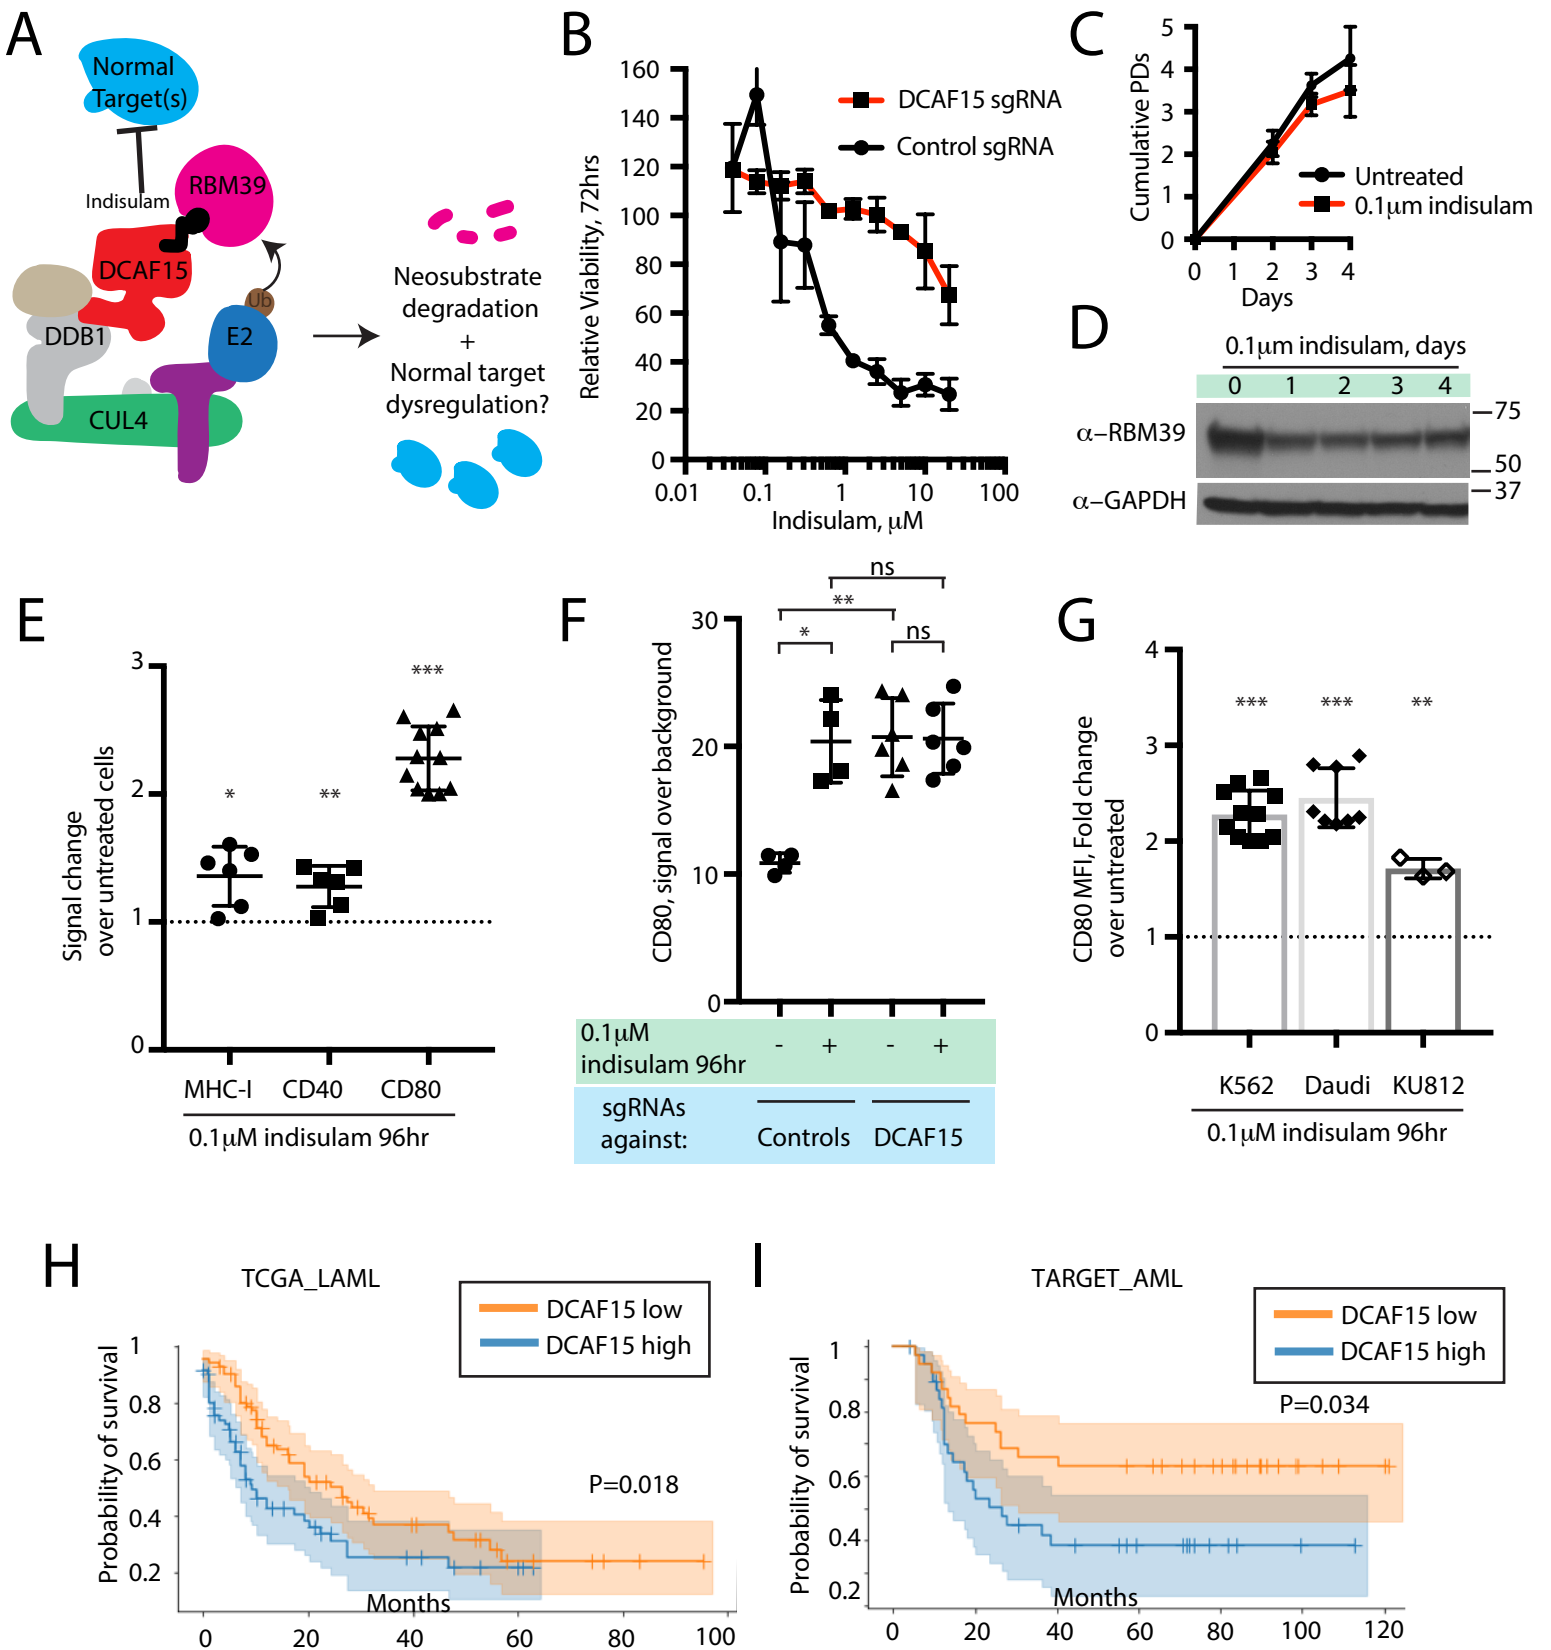

Fig. 6

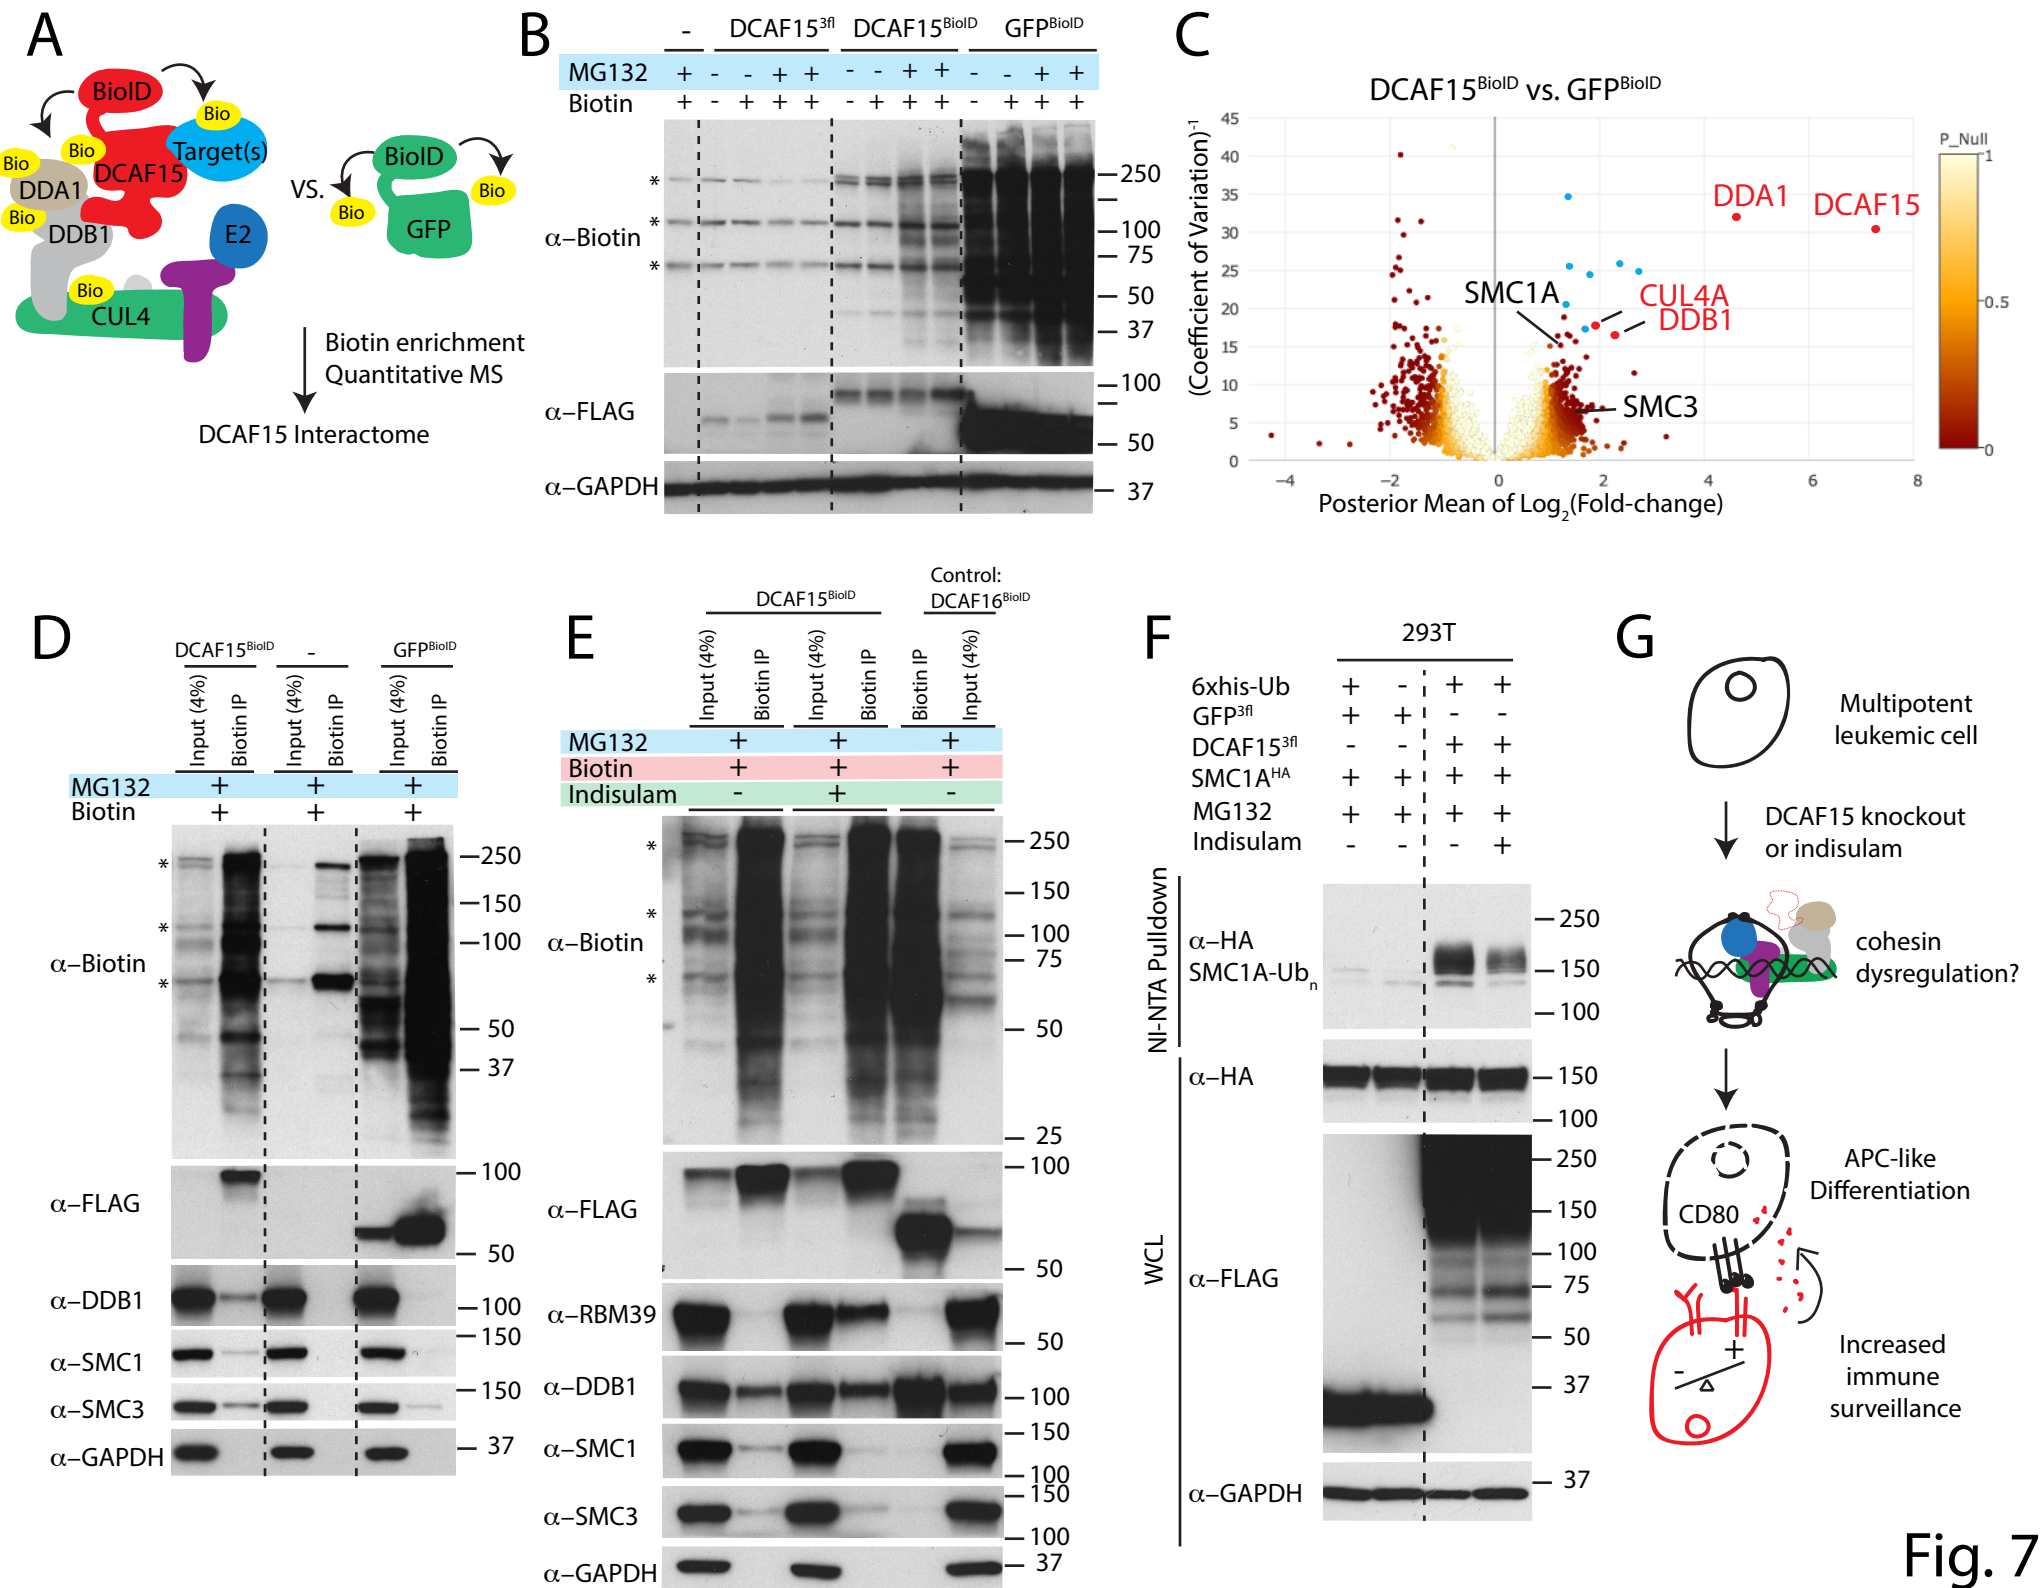

Fig. 7



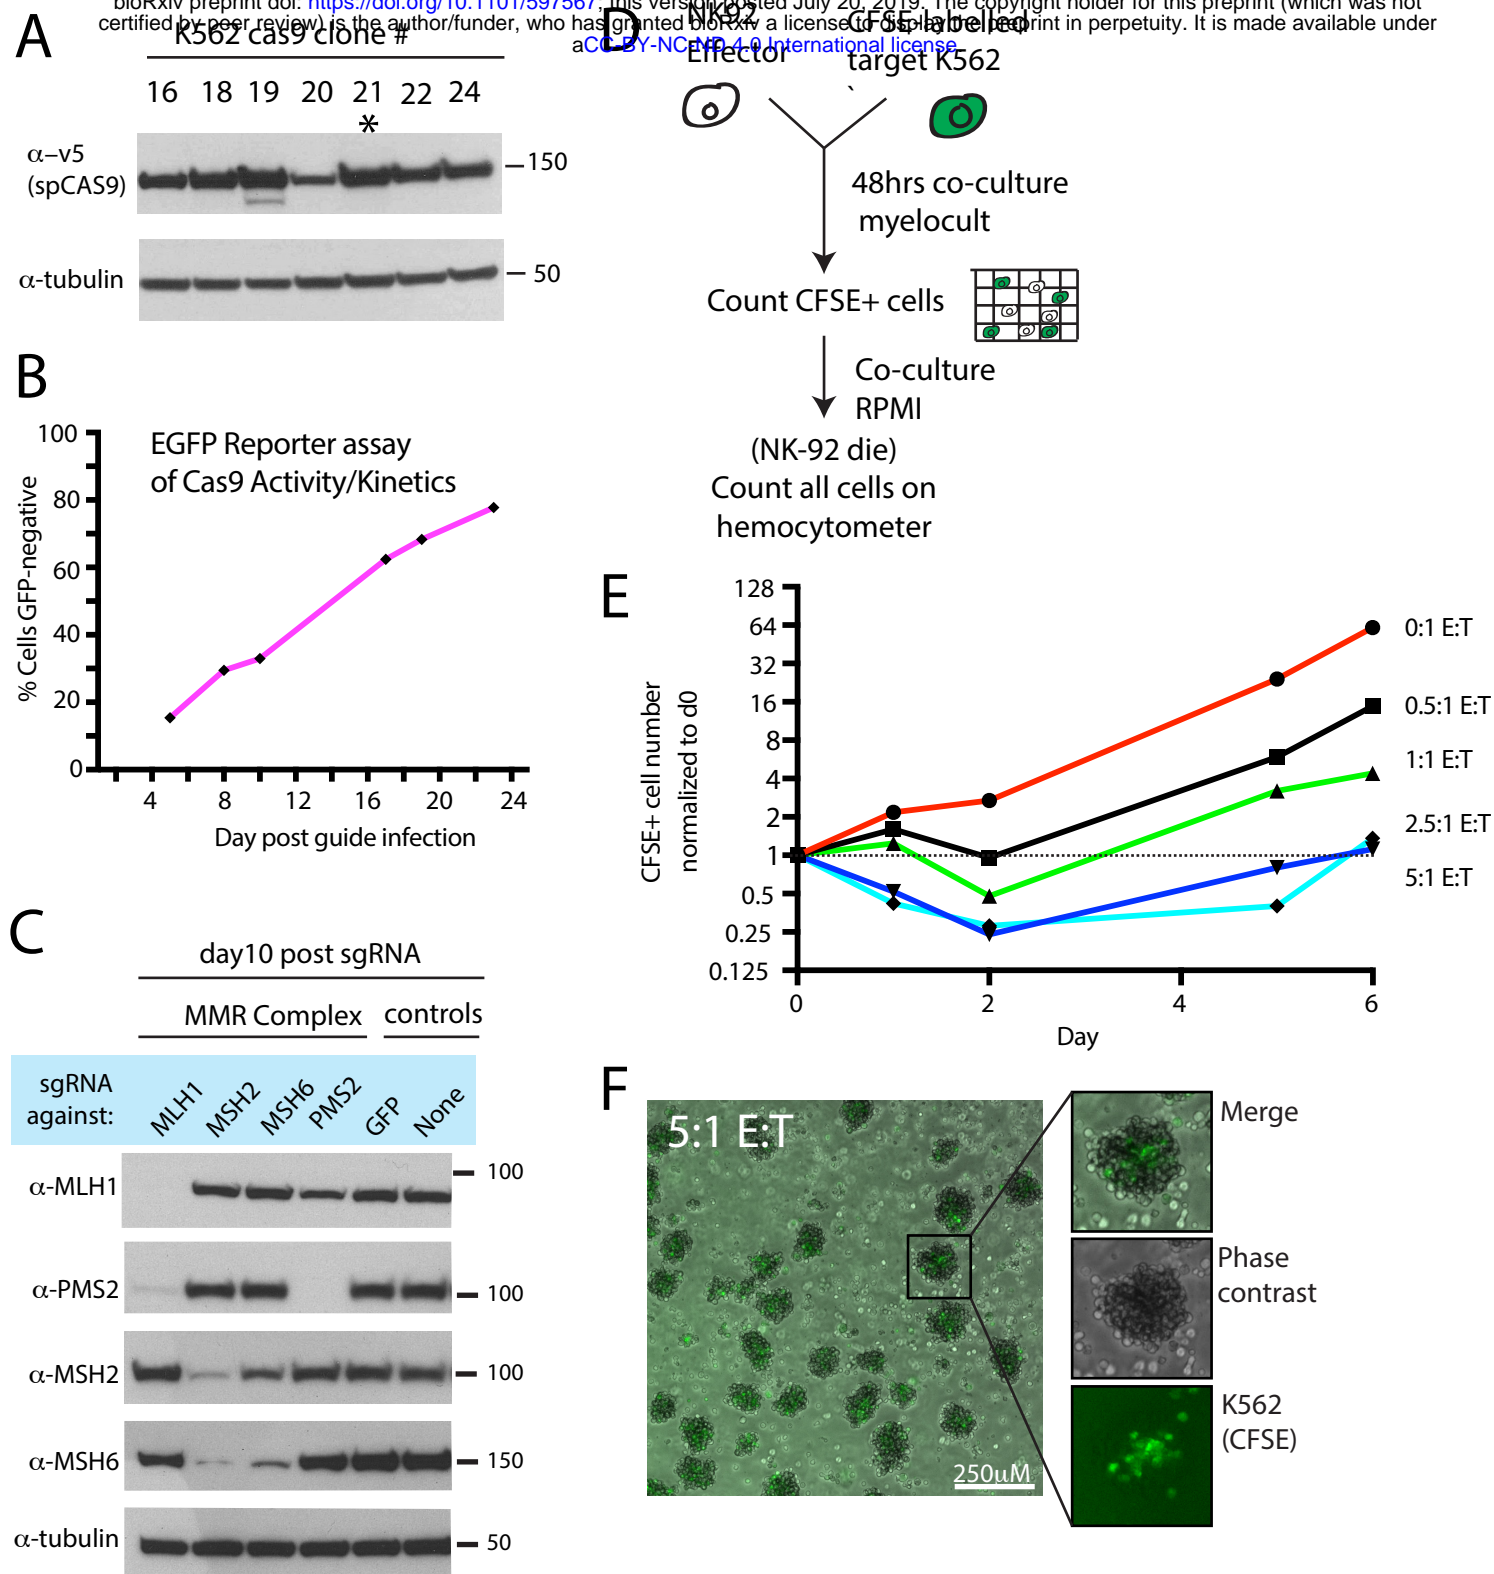

Fig1- S1



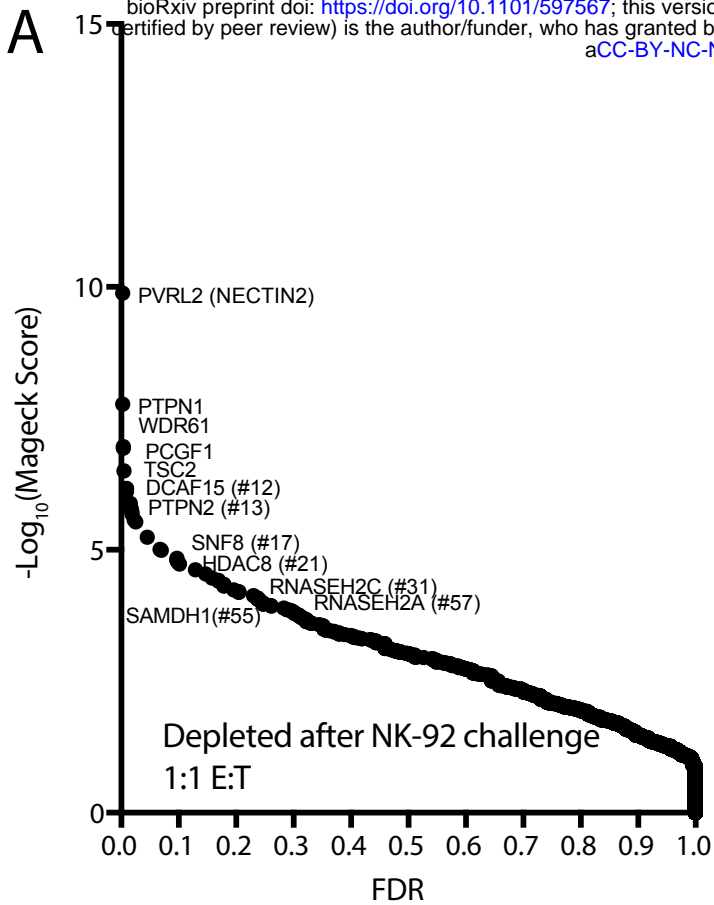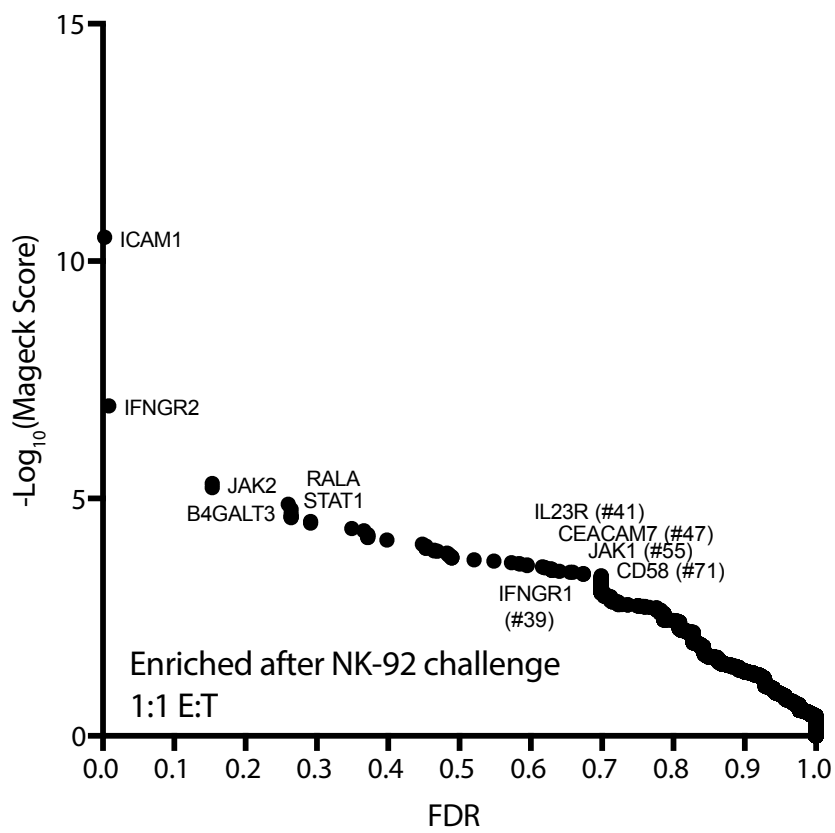

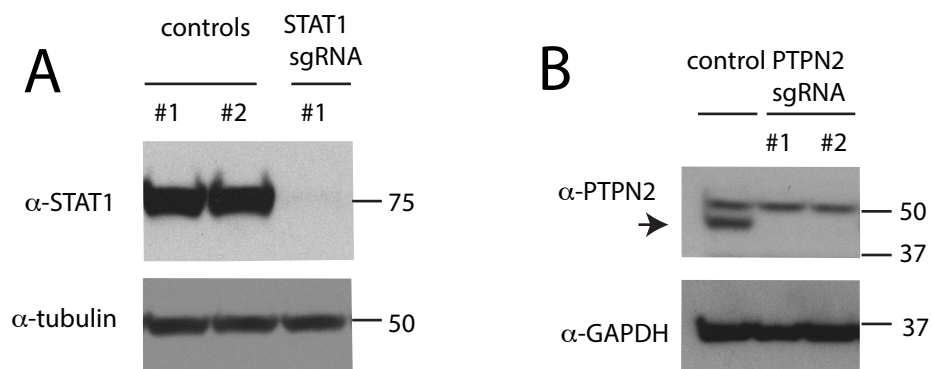

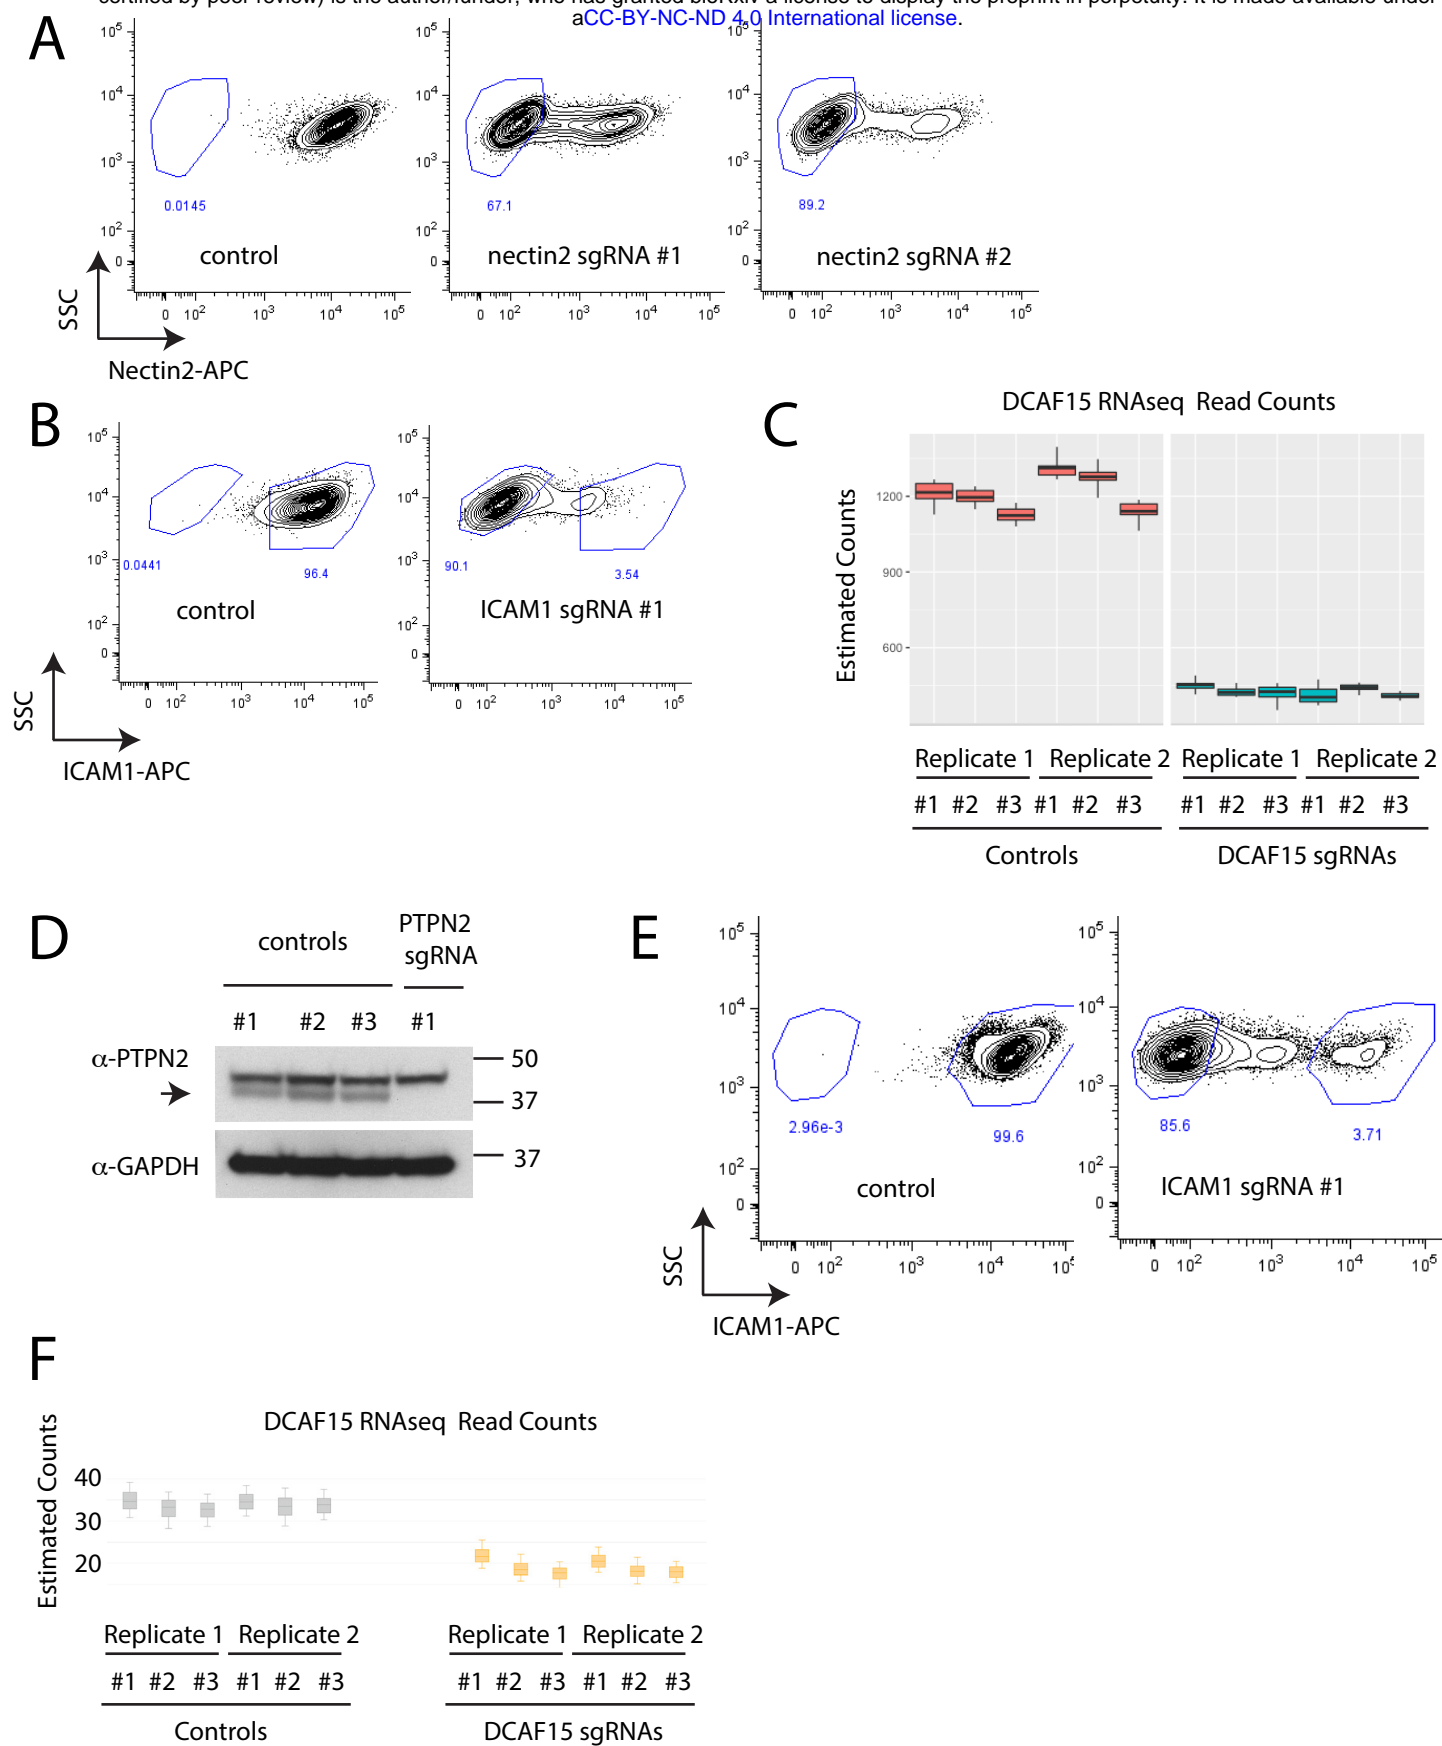

**A**

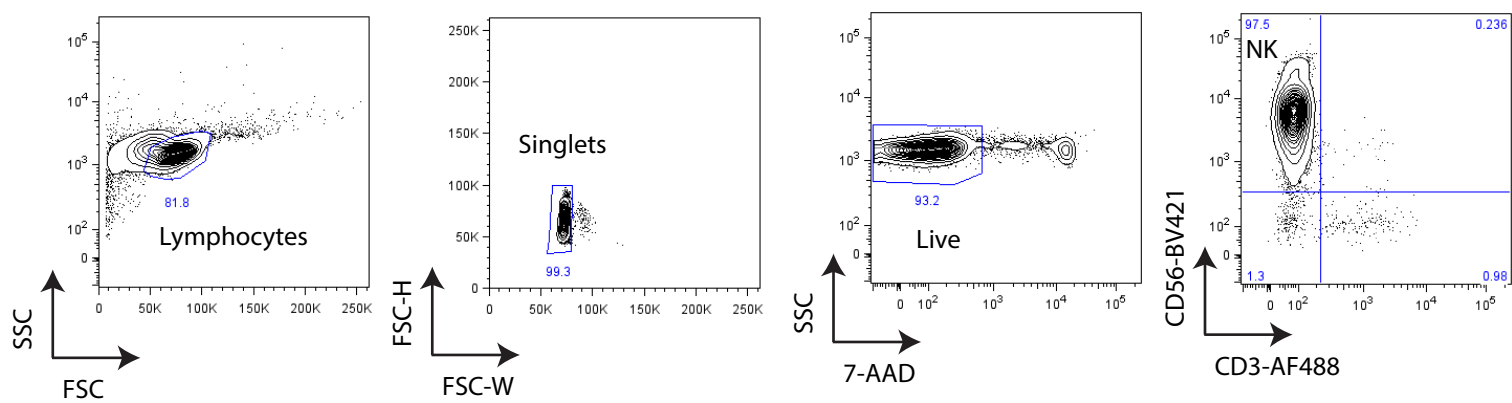

**B**

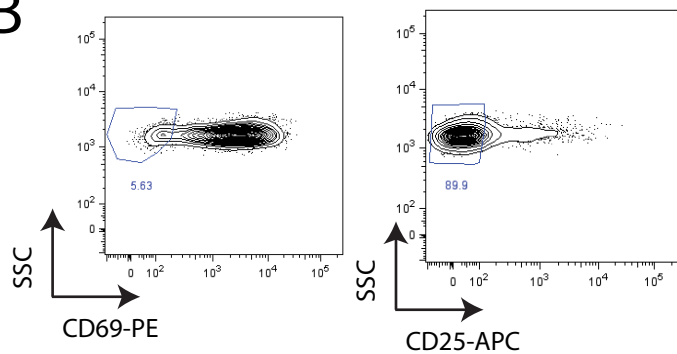

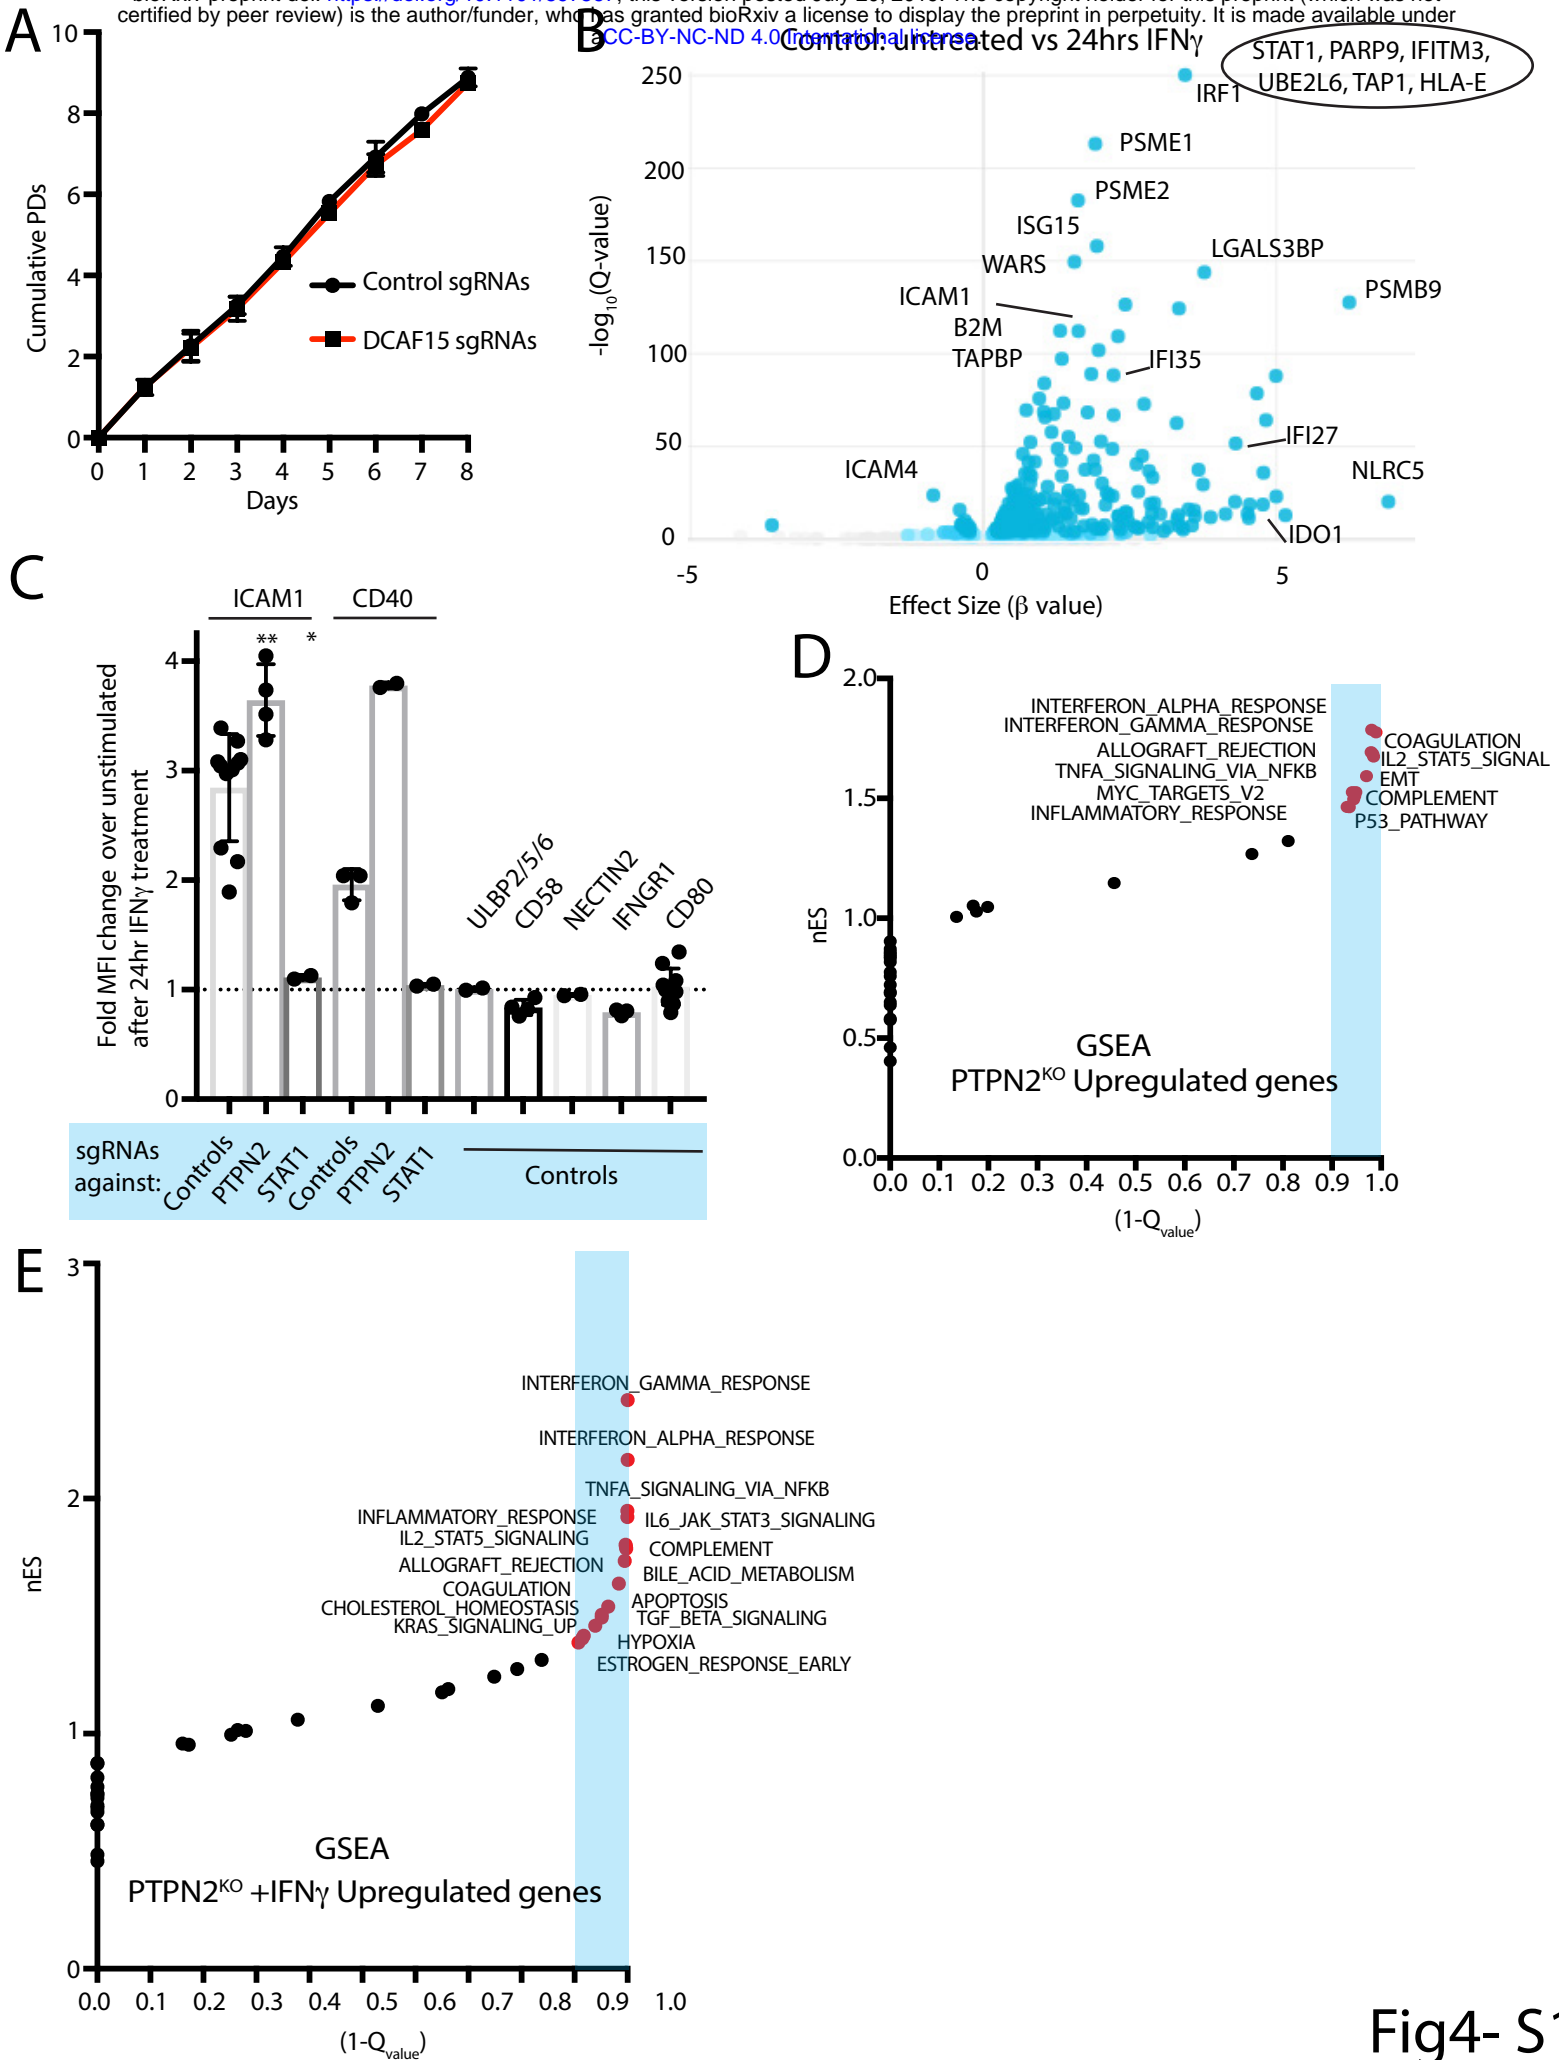

Fig4- S1

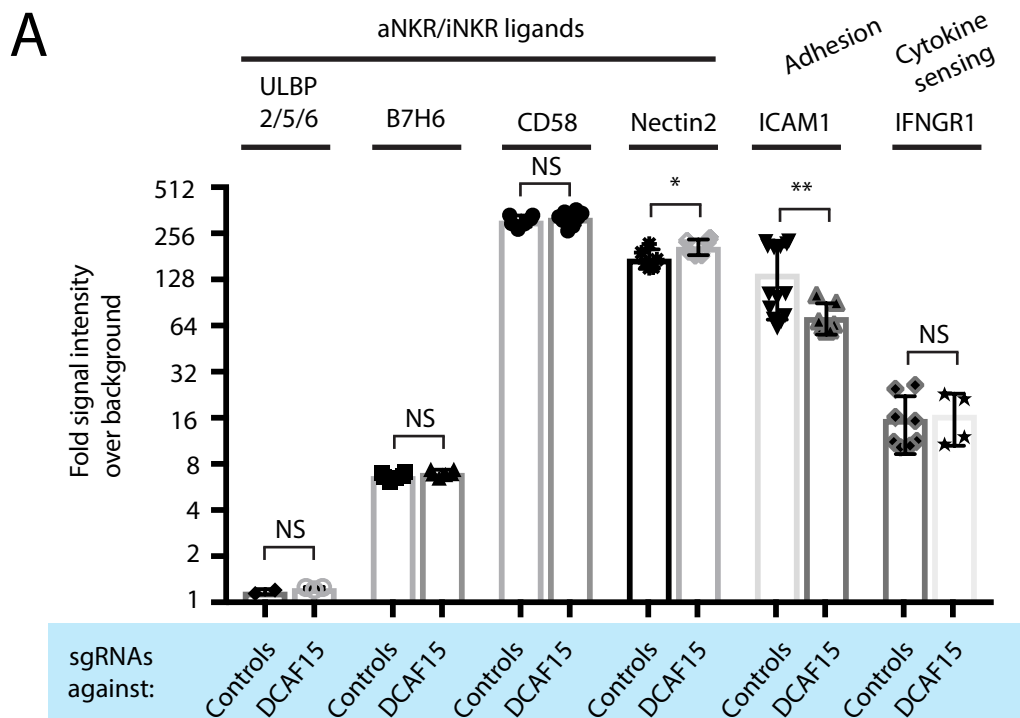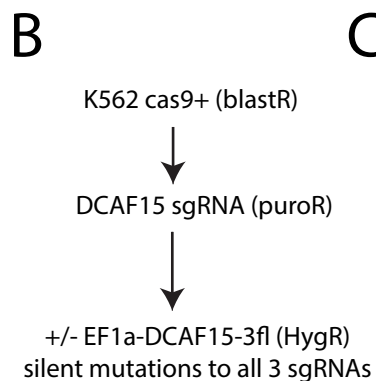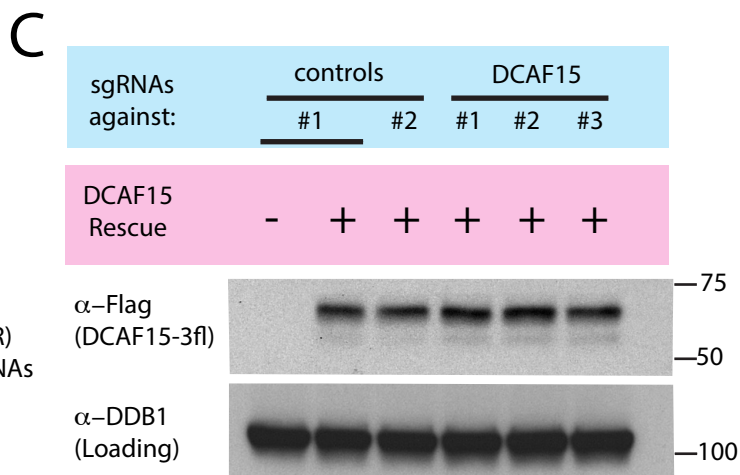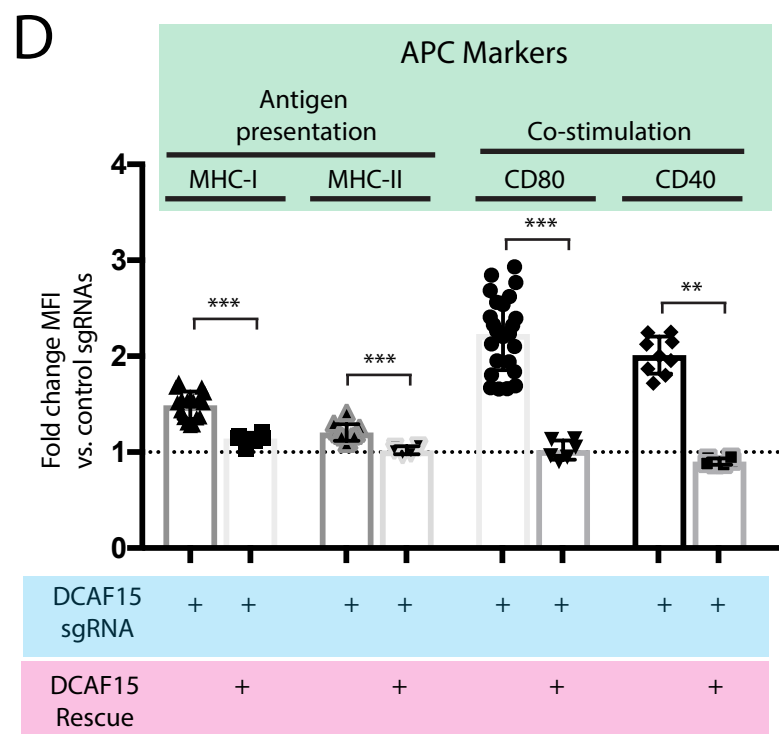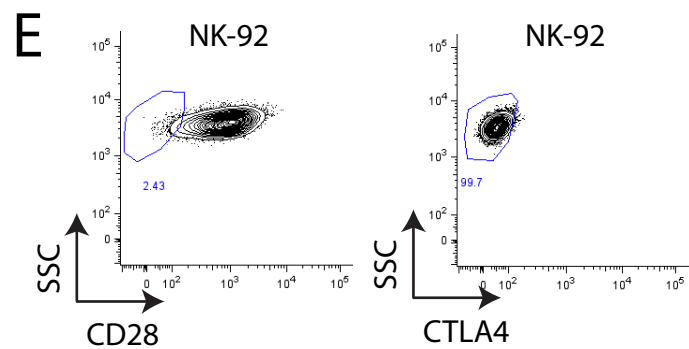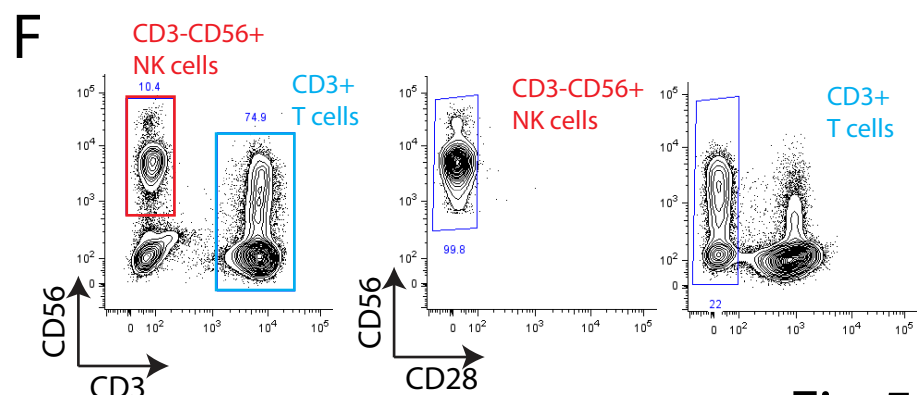

Fig.5-S1

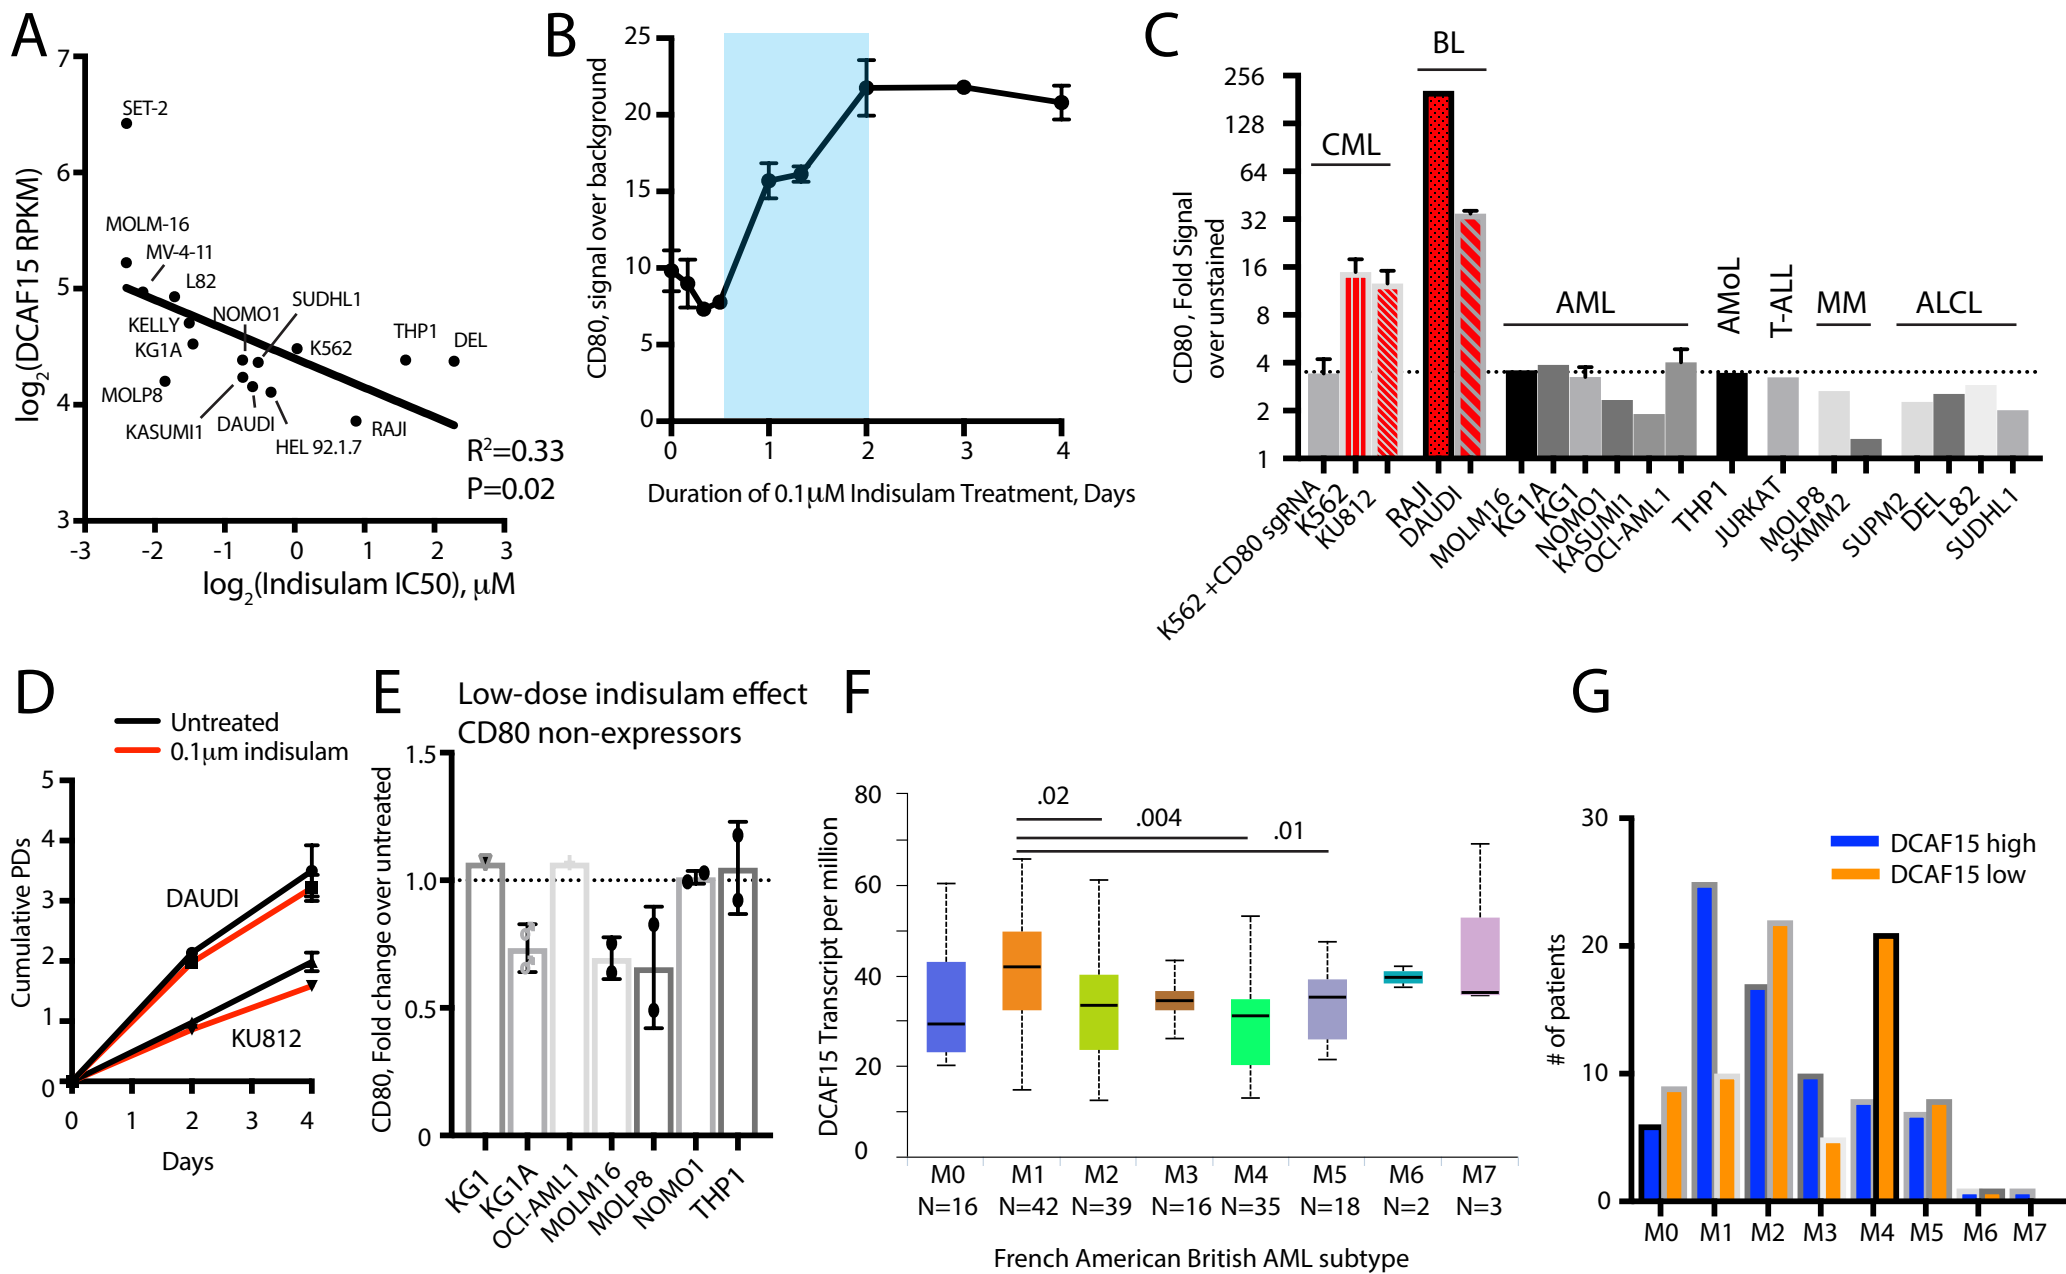

Fig.6-S1



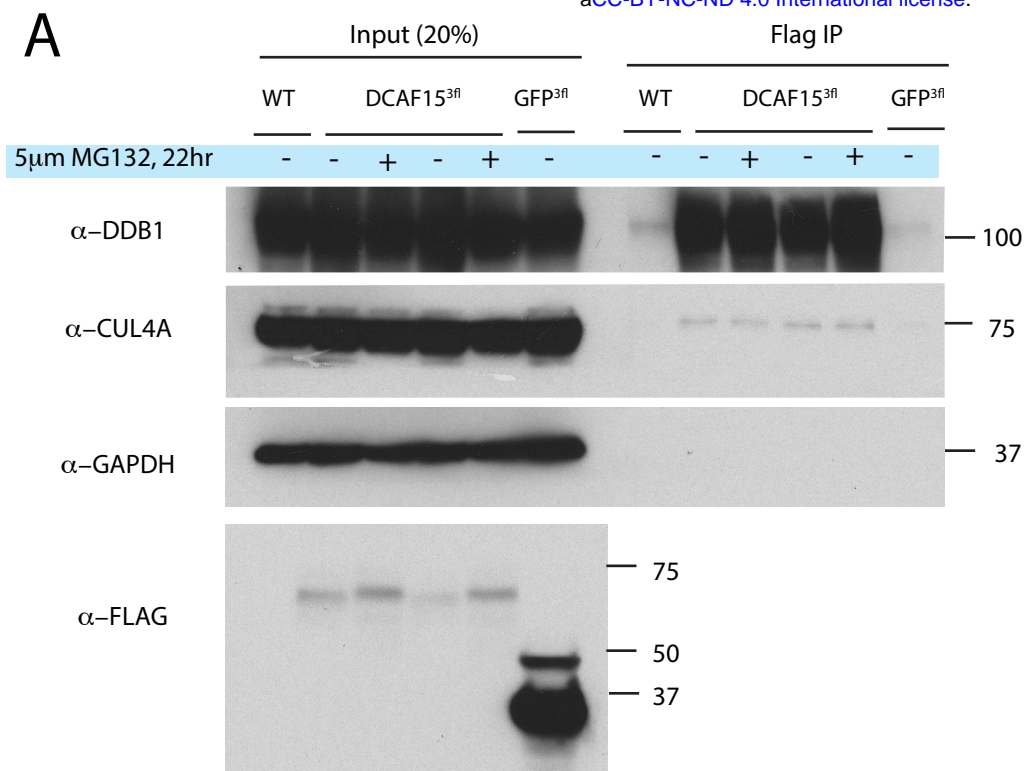

Source: https://www.biorxiv.org/content/10.1101/597567v2.full.pdf
